# Supplementary material for: The Incidence of Infection Complicating Snakebites in Tropical Australia: Implications for Clinical Management and Antimicrobial Prophylaxis
Source: J Trop Med. 2023 Oct 12;2023:5812766. doi: 10.1155/2023/5812766 (PMC10586896; doi:10.1155/2023/5812766)
Supplement: Supplementary Materials — Supplementary Figure 1: Annual incidence of snakebite presentations per 100,000 population during the study period. Supplementary Figure 2: Month of the snakebite in this cohort. In the southern hemisphere, spring is September to November inclusive, summer is December to February inclusive, autumn is March to May inclusive, and winter is June to August inclusive. In far North Queensland, the monsoonal wet season occurs between November and May. [file 5812766.f1.zip › Dataset for JTM.txt]

case	consensus	admdate	month	year	dischargedate	ageatadmission	gender	hblowestfirst24h	wcchighestfirst24h	neutrophilshighestfirst24h	plateletslowestfirst24h	fragmentedredcellsonbloodfilmybf	aptthighestfirst24h	derivedfibrinogenlowestfirst24h	ddimerhighestfirst24h	inrhighestfirst24h	ckhighestfirst24h	creatininehighestfirst24h	crphighestfirst24h	rbcq	erythematousyn	pusyn	blisteringyn	vdkcollectedyn	vdkresult	suddencollapseyn	nonspecificroprtedsx	antivenomgivenyn	reactiontoantivenomyn	inidicationforantivenom	coagulopathy	myotoxicity	microangiopathy	aki	haemorrhage	collapse	neurotoxicity	nss	icdcodedesc	animal	biteyn	site	limb	delayed8hrsfrominjtodrreview	daystochadmissionafterbitehastob	priordrreviewyn	referreddirectlytochbydrgphospot	referreddirectlytochfromregional	infectedatpresentationyn
968		23 Jul 2019	7	2019	23 Jul 2019	21	M	155	15.4	12.08	195	no comment	30	1.6	0.6	1.1	393	78		N	Y	N	N	N	NA	N	Nausea, vomiting	N	nad	nad	0	0	0	0	0	0	0	0	BITTEN / CRUSHED SNAKE NOS	Snake	Y	Arm	1	N	0	Y - IHT Weipa	Y	Y	N
970		13 Oct 2018	10	2018	14 Oct 2018	1	M	120	11.4	5.39	391	no comment	29	2.4	1.0	1.0	204	33		N	N	N	N	N	NA	N	N	N	nad	nad	0	0	0	0	0	0	0	0	BITTEN OR CRUSHED BY NONVENOMOUS SNAKE	Snake	Y	Arm	1	N	0	Y - IHT Mossman	Y	Y	N
978		19 Feb 2015	2	2015	19 Feb 2015	7	F	113	9.5	4.3	349	no comment	36	2.8	0.3	1.1	142	38		N	N	N	N	N	not done	N	N	N	nad	nad	0	0	0	0	0	0	0	0	BITTEN / CRUSHED SNAKE NOS	Snake	Y	Arm	1	N	0	N	N	N	N
979		23 May 2019	5	2019	24 May 2019	24	F	126	8.9	6.47	200	no comment	42	2.1	0.1	1.1	91	58		N	N	N	N	N	NA	N	Headache, abdominal pain	N	nad	nad	0	0	0	0	0	0	0	0	BITTEN / CRUSHED SNAKE NOS	Snake	Y	Arm	1	N	0	N	N	N	N
980		07 Mar 2015	3	2015	07 Mar 2015	49	F	146	11.3	6.45	189	BFR no fragmented red cells	27	3.7	1.1	0.9	572	71		N	N	N	N	N	not done	N	N	N	nad	nad	0	0	0	0	0	0	0	0	BITTEN / CRUSHED SNAKE NOS	Snake	Y	Arm	1	N	0	N	N	N	N
981		16 May 2019	5	2019	16 May 2019	55	F	142	4.5	2.65	181	no comment	25	2.6	0.1	0.9	59	65		N	N	N	N	N	NA	N	N	N	nad	nad	0	0	0	0	0	0	0	0	BITTEN / CRUSHED SNAKE NOS	Snake	Y	Arm	1	N	0	N	N	N	N
982		31 Oct 2016	10	2016	31 Oct 2016	58	F	153	10.2	7.29	235	no comment	28	3.2	0.3	1.1	131	67		N	N	N	N	N	not done	N	N	N	nad	nad	0	0	0	0	0	0	0	0	BITTEN / CRUSHED SNAKE NOS	Snake	Y	Arm	1	N	0	N	N	N	N
983		02 Jan 2020	1	2020	03 Jan 2020	68	F	135	8.9	5.03	255	no comment	24	3.6	0.6	1.0	228	77		N	N	N	N	N	NA	N	N	N	nad	nad	0	0	0	0	0	0	0	0	BITTEN / CRUSHED SNAKE NOS	Snake	Y	Arm	1	N	0	N	N	N	N
984		05 Apr 2016	4	2016	05 Apr 2016	69	F	120	8.5	6.78	195	no comment	25	4.2		1.0	112	70		N	N	N	N	N	not done	N	N	N	nad	nad	0	0	0	0	0	0	0	0	BITTEN / CRUSHED SNAKE NOS	Snake	Y	Arm	1	N	0	N	N	N	N
985		19 Apr 2018	4	2018	20 Apr 2018	20	M	137	10.5	7.8	201	no comment	26	2.7	0.3	1.1	216	102		N	N	N	N	N	NA	N	Nausea, dizzy, pain	N	nad	nad	0	0	0	0	0	0	0	0	BITTEN / CRUSHED SNAKE NOS	Snake	Y	Arm	1	N	0	N	N	N	N
986		23 Mar 2020	3	2020	23 Mar 2020	21	M	147	6.9	4.46	253	no comment	30	2.0	0.3	1.1	150	77		N	N	N	N	N	NA	N	N	N	nad	nad	0	0	0	0	0	0	0	0	BITTEN / CRUSHED SNAKE NOS	Snake	Y	Arm	1	N	0	N	N	N	N
987		14 Nov 2018	11	2018	15 Nov 2018	24	M	146	5.8	2.74	322	no comment	30	1.8		1.1	162	94		N	N	N	N	N	NA	N	N	N	nad	nad	0	0	0	0	0	0	0	0	BITTEN / CRUSHED SNAKE NOS	Snake	Y	Arm	1	N	0	N	N	N	N
988		31 Oct 2016	10	2016	31 Oct 2016	25	M	138	12.3	6.35	194	BFR no fragmented red cells	25	1.6	1.1	1.1	346	118		N	N	N	N	N	not done	N	N	N	nad	nad	0	0	0	0	0	0	0	0	BITTEN / CRUSHED SNAKE NOS	Snake	Y	Arm	1	N	0	N	N	N	N
989		22 Oct 2014	10	2014	22 Oct 2014	42	M	157	7.7	4.07	126	no comment	34	2.2	0.4	1.1	174	100		N	Y	N	N	N	not done	N	bite, pain and swelling	N	nad	nad	0	0	0	0	0	0	0	0	BITTEN / CRUSHED SNAKE NOS	Snake	Y	Arm	1	N	0	N	N	N	N
990		05 Aug 2016	8	2016	06 Aug 2016	46	M	149	7.6	4.95	254	no comment	26	2.1	0.1	1.1	173	82		N	N	N	N	Y	negative	N	N	N	nad	nad	0	0	0	0	0	0	0	0	BITTEN / CRUSHED SNAKE NOS	Snake	Y	Arm	1	N	0	N	N	N	N
991		05 Apr 2020	4	2020	06 Apr 2020	56	M	144	7.5	4.86	253	no comment	30	2.2	0.4	1.0	303	95		N	N	N	N	N	NA	N	N	N	nad	nad	0	0	0	0	0	0	0	0	BITTEN / CRUSHED SNAKE NOS	Snake	Y	Arm	1	N	0	N	N	N	N
992		18 Mar 2018	3	2018	19 Mar 2018	70	M	148	6.4	4.35	325	no comment	27	2.6	0.4	0.9	1180	79		N	N	N	N	N	NA	N	Headache, dry mouth	N	nad	nad	0	0	0	0	0	0	0	0	BITTEN / CRUSHED SNAKE NOS	Snake	Y	Arm	1	N	0	N	N	N	N
993		26 Jun 2015	6	2015	26 Jun 2015	82	M	118	7.4	5.46	149	no comment	50	4.0	0.3	2.4	89	90	9.699999809	N	N	N	N	N	not done	N	woozy	N	nad	nad	0	0	0	0	0	0	0	0	BITTEN / CRUSHED SNAKE NOS	Snake	Y	Arm	1	N	0	N	N	N	N
994		22 Mar 2020	3	2020	22 Mar 2020	47	F	134	18.4	11.52	304	BFR no fragmented red cells	34	2.7	0.4	1.0	252	51		N	N	N	N	N	NA	N	Abdominal pain	N	nad	nad	0	0	0	0	0	0	0	0	BITTEN OR CRUSHED BY NONVENOMOUS SNAKE	Snake	Y	Arm	1	N	0	N	N	N	N
995		09 Dec 2018	12	2018	09 Dec 2018	58	F	117	6.7	3.37	251	BFR no fragmented red cells	31	2.9	0.5	0.9	91	67		N	N	N	N	N	NA	N	N	N	nad	nad	0	0	0	0	0	0	0	0	BITTEN OR CRUSHED BY NONVENOMOUS SNAKE	Snake	Y	Arm	1	N	0	N	N	N	N
996		04 Aug 2016	8	2016	05 Aug 2016	65	M	153	7.3	3.7	218	no comment	30	2.5	0.4	1.0	129	88		N	N	N	N	N	not done	N	leg felt a little tingly and heavy, subjective dyspnoea	N	nad	nad	0	0	0	0	0	0	0	0	BITTEN OR CRUSHED BY NONVENOMOUS SNAKE	Snake	Y	Arm	1	N	0	N	N	N	N
997		18 Jan 2015	1	2015	18 Jan 2015	90	M	105	5.3	3.89	263	no comment	41	5.5	1.3	2.6	396	86		N	N	N	N	N	not done	N	N	N	nad	nad	0	0	0	0	0	0	0	0	CONTACT WITH BROWN SNAKE	Snake	Y	Arm	1	N	0	N	N	N	N
1362		12 Sep 2017	9	2017	13 Sep 2017	55	F	131	6.5	3.04	264	no comment	26	2.4	0.3	1.0	100	63		N	N	N	N	N	NA	N	Palpitations	N	nad	nad	0	0	0	0	0	0	0	0	BITTEN / CRUSHED SNAKE NOS	Snake	Y	Arm	1	N	0	Y - direct ref GP	Y	N	N
1366		01 Feb 2017	2	2017	01 Feb 2017	61	F	134	9.3	4.73	342	no comment	23	4.9	0.7	1.1	55	54		N	N	N	N	N	NA	N	Pain	N	nad	nad	0	0	0	0	0	0	0	0	BITTEN / CRUSHED SNAKE NOS	Snake	Y	Arm	1	N	0	Y - GP	Y	N	N
1426		30 May 2016	5	2016	31 May 2016	22	M	140	4.9	2.38	204	no comment	37	2.0	0.1	1.2	278	72		N	N	N	N	N	not done	N	burning pain	N	nad	nad	0	0	0	0	0	0	0	0	BITTEN / CRUSHED SNAKE NOS	Snake	Y	Arm	1	N	0	Y - IHT Laura	Y	Y	N
1430		18 Feb 2015	2	2015	19 Feb 2015	11	M	132	6.3	3.34	238	no comment	33	3.8	0.5	1.2	154	58		N	N	N	N	N	not done	N	diaphoretic and pre-syncopal initially	N	nad	nad	0	0	0	0	0	0	0	0	BITTEN / CRUSHED SNAKE NOS	Snake	Y	Arm	1	N	0	Y - IHT Mareeba	Y	Y	N
1431		17 Jan 2019	1	2019	17 Jan 2019	32	M	152	8.3	5.03	287	no comment	32	2.6		1.0	136	93		N	N	N	N	N	NA	N	N	N	nad	nad	0	0	0	0	0	0	0	0	CONTACT WITH TAIPAN	Snake	Y	Arm	1	N	0	Y - IHT Mareeba	Y	Y	N
1517		14 Jan 2020	1	2020	15 Jan 2020	28	M	141	5.5	2.91	166	no comment	32	1.9	0.4	1.0	2380	102		N	N	N	N	N	NA	N	N	N	nad	nad	0	0	0	0	0	0	0	0	BITTEN / CRUSHED SNAKE NOS	Snake	Y	Arm	1	N	0	Y - IHT Mossman	Y	Y	N
1645		02 Jul 2017	7	2017	02 Jul 2017	21	M	153	8.8	5.68	210	no comment	41	2.1	0.3	1.1	489	78		N	N	N	N	N	NA	N	N	N	nad	nad	0	0	0	0	0	0	0	0	BITTEN / CRUSHED SNAKE NOS	Snake	Y	Arm	1	N	0	Y - RFDS	Y	Y	N
1654		07 Oct 2015	10	2015	08 Oct 2015	41	M	154	11.4	7.91	263	no comment	29	2.5		1.1	119	115		N	N	N	N	N	not done	N	dizziness and palpitaions	N	nad	nad	0	0	0	0	0	0	0	0	BITTEN OR CRUSHED BY NONVENOMOUS SNAKE	Snake	Y	Arm	1	N	0	Y - RFDS	Y	Y	N
962		11 Nov 2019	11	2019	11 Nov 2019	25	M	140	10.5	6.05	195	no comment	28	2.8	0.3	1.0	788	99		N	N	N	N	N	NA	N	Pain	N	nad	nad	0	0	0	0	0	0	0	0	BITTEN / CRUSHED SNAKE NOS	Snake	Y	Foot/ankle	1	N	0	Y - IHT Cooktown	Y	Y	N
966		13 Oct 2020	10	2020	13 Oct 2020	66	M	140	6.1	3.23	226	no comment	29	2.7	0.3	0.9	178	108		N	N	N	N	N	NA	N	N	N	nad	nad	0	0	0	0	0	0	0	0	BITTEN OR CRUSHED BY NONVENOMOUS SNAKE	Snake	Y	Foot/ankle	1	N	0	N	N	N	N
969		18 Dec 2018	12	2018	19 Dec 2018	47	F	115	8.0	3.86	177	BFR no fragmented red cells	27	3.3		1.1		83		N	N	N	N	N	NA	N	N	N	nad	nad	0	0	0	0	0	0	0	0	BITTEN / CRUSHED SNAKE NOS	Snake	Y	Foot/ankle	1	N	0	N	N	N	N
971		25 Oct 2015	10	2015	25 Oct 2015	51	F	125	9.7	6.84	382	no comment	32	2.8	0.1	1.1	64	49		N	N	N	N	N	not done	N	N	N	nad	nad	0	0	0	0	0	0	0	0	BITTEN OR CRUSHED BY NONVENOMOUS SNAKE	Snake	Y	Foot/ankle	1	N	0	Y - IHT Cooktown	Y	Y	N
972		06 Dec 2014	12	2014	06 Dec 2014	50	F	140	7.8	4.43	324	no comment	28	2.5	0.3	1.0	171	53		N	Y	N	N	N	not done	N	sore at bite site, warm/swollen, Abx	N	nad	nad	0	0	0	0	0	0	0	0	BITTEN / CRUSHED SNAKE NOS	Snake	Y	Foot/ankle	1	N	0	Y - IHT Cooktown	Y	Y	N
973		22 Mar 2020	3	2020	23 Mar 2020	70	M	154	6.2	3.32	189	no comment	32	2.7	0.5	1.1	107	83		N	N	N	N	N	NA	N	Pain	N	nad	nad	0	0	0	0	0	0	0	0	CONTACT WITH BLACK SNAKE	Snake	Y	Foot/ankle	1	N	0	N	N	N	N
976		11 Apr 2016	4	2016	11 Apr 2016	23	M	151	11.4	6.74	230	no comment	34	2.5	0.3	1.1	168	94		N	N	N	N	N	not done	N	N	N	nad	nad	0	0	0	0	0	0	0	0	BITTEN OR CRUSHED BY NONVENOMOUS SNAKE	Snake	Y	Foot/ankle	1	N	0	N	N	N	N
998		17 Dec 2015	12	2015	17 Dec 2015	49	M	139	7.9	3.46	220	no comment	28	4.0	0.1	1.0	161	65		N	N	N	N	N	not done	N	N	N	nad	nad	0	0	0	0	0	0	0	0	BITTEN OR CRUSHED BY NONVENOMOUS SNAKE	Snake	N	Foot/ankle	1	N	0	N	N	N	N
999		12 Oct 2014	10	2014	13 Oct 2014	2	F	122	8.4	2.1	268	no comment	30	2.1	0.9	1.1	56	29		N	N	N	N	N	not done	N	N	N	nad	nad	0	0	0	0	0	0	0	0	BITTEN / CRUSHED SNAKE NOS	Snake	Y	Foot/ankle	1	N	0	N	N	N	N
1000		15 Dec 2015	12	2015	16 Dec 2015	4	F	126	8.9	4.85	298	BFR no fragmented red cells	30	2.6	0.2	1.1	128	66		N	N	N	N	N	not done	N	N	N	nad	nad	0	0	0	0	0	0	0	0	BITTEN / CRUSHED SNAKE NOS	Snake	Y	Foot/ankle	1	N	0	N	N	N	N
1001		21 Nov 2019	11	2019	21 Nov 2019	4	F	125	7.9	3.35	316	BFR no fragmented red cells	36	1.7		1.1		29		N	N	N	N	N	NA	N	N	N	nad	nad	0	0	0	0	0	0	0	0	BITTEN / CRUSHED SNAKE NOS	Snake	Y	Foot/ankle	1	N	0	N	N	N	N
1002		29 Sep 2017	9	2017	30 Sep 2017	8	F	128	9.1	4.3	303	no comment	30	2.5	0.5	1.2	146	34		N	N	N	N	N	NA	N	N	N	nad	nad	0	0	0	0	0	0	0	0	BITTEN / CRUSHED SNAKE NOS	Snake	Y	Foot/ankle	1	N	0	N	N	N	N
1003		11 Mar 2019	3	2019	11 Mar 2019	8	F	126	7.4	2.79	186	BFR no fragmented red cells	32	1.9		1.1	126	34		N	N	N	N	N	NA	N	N	N	nad	nad	0	0	0	0	0	0	0	0	BITTEN / CRUSHED SNAKE NOS	Snake	Y	Foot/ankle	1	N	0	N	N	N	N
1004		26 Nov 2017	11	2017	27 Nov 2017	9	F	124	9.6	4.43	101	no comment	26	1.7	0.9	0.9	145	45		N	N	N	N	N	NA	N	N	N	nad	nad	0	0	0	0	0	0	0	0	BITTEN / CRUSHED SNAKE NOS	Snake	Y	Foot/ankle	1	N	0	N	N	N	N
1005		14 Mar 2020	3	2020	15 Mar 2020	10	F	106	11.0	5.36	383	BFR no fragmented red cells	31	2.2	1.0	1.1	148	50		N	N	N	N	N	NA	N	N	N	nad	nad	0	0	0	0	0	0	0	0	BITTEN / CRUSHED SNAKE NOS	Snake	Y	Foot/ankle	1	N	0	N	N	N	N
1006		11 Mar 2015	3	2015	12 Mar 2015	11	F	135	7.9	2.97	248	no comment	34	3.0	0.1	1.1	127	66		N	N	N	N	N	not done	N	N	N	nad	nad	0	0	0	0	0	0	0	0	BITTEN / CRUSHED SNAKE NOS	Snake	Y	Foot/ankle	1	N	0	N	N	N	N
1007		08 Apr 2018	4	2018	09 Apr 2018	11	F	136	8.9	4.62	322	no comment	29	2.3	0.4	1.0	121	38		N	N	N	N	N	NA	N	N	N	nad	nad	0	0	0	0	0	0	0	0	BITTEN / CRUSHED SNAKE NOS	Snake	Y	Foot/ankle	1	N	0	N	N	N	N
1008		07 May 2016	5	2016	08 May 2016	12	F	129	9.4	4.36	208	no comment	26	2.4	1.1	1.0	93	64		N	N	N	N	N	not done	N	N	N	nad	nad	0	0	0	0	0	0	0	0	BITTEN / CRUSHED SNAKE NOS	Snake	Y	Foot/ankle	1	N	0	N	N	N	N
1009		16 May 2018	5	2018	17 May 2018	14	F	123	9.2	5.65	319	no comment	32	2.3	0.3	1.1	114	75		N	N	N	N	N	NA	N	N	N	nad	nad	0	0	0	0	0	0	0	0	BITTEN / CRUSHED SNAKE NOS	Snake	Y	Foot/ankle	1	N	0	N	N	N	N
1010		16 Dec 2018	12	2018	16 Dec 2018	15	F	137	9.1	5.05	221	BFR no fragmented red cells	29	4.0	0.4	1.0	82	49		N	N	N	N	N	NA	N	Nausea, pain	N	nad	nad	0	0	0	0	0	0	0	0	BITTEN / CRUSHED SNAKE NOS	Snake	Y	Foot/ankle	1	N	0	N	N	N	N
1011		17 May 2014	5	2014	18 May 2014	16	F	133	9.6	4.96	221	no comment	27	2.6	0.1	1.1	133	93		N	N	N	N	N	not done	N	minor bite site pain	N	nad	nad	0	0	0	0	0	0	0	0	BITTEN / CRUSHED SNAKE NOS	Snake	Y	Foot/ankle	1	N	0	N	N	N	N
1012		01 Nov 2017	11	2017	14 Dec 2017	16	F	127	13.1	8.66	263	no comment	25	3.7	0.9	0.9	71	93		N	N	N	N	N	NA	N	Nausea	N	nad	nad	0	0	0	0	0	0	0	0	BITTEN / CRUSHED SNAKE NOS	Snake	Y	Foot/ankle	1	N	0	N	N	N	N
1013		13 Dec 2017	12	2017	02 Nov 2017	16	F	124	12.8	7.5	238	no comment	26	3.4	0.3	0.9	52	73		N	N	N	N	N	NA	N	Nausea	N	nad	nad	0	0	0	0	0	0	0	0	BITTEN / CRUSHED SNAKE NOS	Snake	Y	Foot/ankle	1	N	0	N	N	N	N
1014		26 Aug 2018	8	2018	27 Aug 2018	16	F	124	10.1	5.75	211	no comment	29	2.4	0.6	1.0	85	51		N	N	N	N	N	NA	N	Abdominal pain	N	nad	nad	0	0	0	0	0	0	0	0	BITTEN / CRUSHED SNAKE NOS	Snake	Y	Foot/ankle	1	N	0	N	N	N	N
1015		10 Jan 2015	1	2015	10 Jan 2015	17	F	121	5.6	2.91	197	no comment	43	2.2	0.1	1.1		60		N	N	N	N	N	not done	N	N	N	nad	nad	0	0	0	0	0	0	0	0	BITTEN / CRUSHED SNAKE NOS	Snake	Y	Foot/ankle	1	N	0	N	N	N	N
1016		05 Feb 2015	2	2015	05 Feb 2015	17	F	134	8.5	4.02	231	no comment	34	3.5	0.1	1.1	92	66		N	N	N	N	N	not done	N	mild headache	N	nad	nad	0	0	0	0	0	0	0	0	BITTEN / CRUSHED SNAKE NOS	Snake	Y	Foot/ankle	1	N	0	N	N	N	N
1017		21 Dec 2017	12	2017	22 Dec 2017	18	F	124	15.2	11.03	292	no comment	30	3.3	0.1	1.2	79	79		N	N	N	N	N	NA	N	N	N	nad	nad	0	0	0	0	0	0	0	0	BITTEN / CRUSHED SNAKE NOS	Snake	Y	Foot/ankle	1	N	0	N	N	N	N
1018		19 May 2018	5	2018	20 May 2018	19	F	134	8.3	4.83	279	no comment	25	2.5	0.3	1.0	142	70		N	N	N	N	N	NA	N	N	N	nad	nad	0	0	0	0	0	0	0	0	BITTEN / CRUSHED SNAKE NOS	Snake	Y	Foot/ankle	1	N	0	N	N	N	N
1019		05 Jan 2019	1	2019	05 Jan 2019	19	F	124	8.5	5.4	188	no comment	34	2.1	0.1	1.1	121	60		N	N	N	N	N	NA	N	N	N	nad	nad	0	0	0	0	0	0	0	0	BITTEN / CRUSHED SNAKE NOS	Snake	Y	Foot/ankle	1	N	0	N	N	N	N
1020		05 Feb 2020	2	2020	05 Feb 2020	19	F	103	10.7	7.94	207	no comment	30	3.7	0.9	1.0	65	48		N	N	N	N	N	NA	N	Dizzy	N	nad	nad	0	0	0	0	0	0	0	0	BITTEN / CRUSHED SNAKE NOS	Snake	Y	Foot/ankle	1	N	0	N	N	N	N
1021		01 Dec 2018	12	2018	02 Dec 2018	20	F	120	6.8	3.69	326	BFR no fragmented red cells	35	1.7	0.1	1.2	131	68		N	N	N	N	N	NA	N	Headache	N	nad	nad	0	0	0	0	0	0	0	0	BITTEN / CRUSHED SNAKE NOS	Snake	Y	Foot/ankle	1	N	0	N	N	N	N
1022		24 Apr 2016	4	2016	24 Apr 2016	21	F	113	9.7	4.38	296	no comment	35	2.4	0.1	1.1	82	48		N	N	N	N	N	not done	N	slight pain at site	N	nad	nad	0	0	0	0	0	0	0	0	BITTEN / CRUSHED SNAKE NOS	Snake	Y	Foot/ankle	1	N	0	N	N	N	N
1023		30 Jan 2019	1	2019	31 Jan 2019	22	F	121	12.3	9.42	210	no comment	22	3.3	0.6	0.9	61	63		N	N	N	N	N	NA	N	N	N	nad	nad	0	0	0	0	0	0	0	0	BITTEN / CRUSHED SNAKE NOS	Snake	Y	Foot/ankle	1	N	0	N	N	N	N
1024		27 Nov 2016	11	2016	27 Nov 2016	24	F	119	9.2	6.09	339	no comment	31	2.8		1.0	67	62		N	N	N	N	Y	negative	N	N	N	nad	nad	0	0	0	0	0	0	0	0	BITTEN / CRUSHED SNAKE NOS	Snake	Y	Foot/ankle	1	N	0	N	N	N	N
1025		26 Feb 2019	2	2019	26 Feb 2019	24	F	138	8.6	5.06	297	no comment	30	2.2	0.1	0.9	53	68		N	N	N	N	N	NA	N	N	N	nad	nad	0	0	0	0	0	0	0	0	BITTEN / CRUSHED SNAKE NOS	Snake	Y	Foot/ankle	1	N	0	N	N	N	N
1026		07 Apr 2016	4	2016	07 Apr 2016	25	F	102	12.3	8.45	267	BFR no fragmented red cells	32	4.1	1.0	1.1	50	54		N	N	N	N	N	not done	N	N	N	nad	nad	0	0	0	0	0	0	0	0	BITTEN / CRUSHED SNAKE NOS	Snake	Y	Foot/ankle	1	N	0	N	N	N	N
1027		08 Aug 2019	8	2019	09 Aug 2019	26	F	119	7.0	3.6	215	no comment	27	2.4	0.3	1.1	147	67		N	N	N	N	N	NA	N	N	N	nad	nad	0	0	0	0	0	0	0	0	BITTEN / CRUSHED SNAKE NOS	Snake	Y	Foot/ankle	1	N	0	N	N	N	N
1028		01 Jan 2017	1	2017	01 Jan 2017	27	F	123	4.5	2.72	196	no comment	31	2.9	0.1	1.2	121	65		N	N	N	N	N	not done	N	N	N	nad	nad	0	0	0	0	0	0	0	0	BITTEN / CRUSHED SNAKE NOS	Snake	Y	Foot/ankle	1	N	0	N	N	N	N
1029		09 Oct 2019	10	2019	09 Jul 2020	28	F	136	7.3	3.02	299	no comment	30	2.4	0.4	1.0	88	51		N	N	N	N	N	NA	N	Headache	N	nad	nad	0	0	0	0	0	0	0	0	BITTEN / CRUSHED SNAKE NOS	Snake	Y	Foot/ankle	1	N	0	N	N	N	N
1030		14 Apr 2020	4	2020	15 Apr 2020	27	F	121	7.9	3.76	193	BFR no fragmented red cells	31	1.5	0.3	1.0	129	64		N	N	N	N	N	NA	N	N	N	nad	nad	0	0	0	0	0	0	0	0	BITTEN / CRUSHED SNAKE NOS	Snake	Y	Foot/ankle	1	N	0	N	N	N	N
1031		17 Feb 2018	2	2018	17 Feb 2018	30	F	125	6.9	3.54	207	no comment	28	1.9	0.2	1.1	159	63		N	N	N	N	N	NA	N	N	N	nad	nad	0	0	0	0	0	0	0	0	BITTEN / CRUSHED SNAKE NOS	Snake	Y	Foot/ankle	1	N	0	N	N	N	N
1032		26 Dec 2018	12	2018	27 Dec 2018	30	F	128	8.0	3.88	263	BFR no fragmented red cells	22	2.5	0.1	1.0	145	63		N	N	N	N	N	NA	N	N	N	nad	nad	0	0	0	0	0	0	0	0	BITTEN / CRUSHED SNAKE NOS	Snake	Y	Foot/ankle	1	N	0	N	N	N	N
1033		08 Oct 2017	10	2017	08 Oct 2017	32	F	118	4.3	2.07	240	no comment	30	1.8	0.1	1.1	197			N	N	N	N	N	N	N	Leg weakness	N	nad	nad	0	0	0	0	0	0	0	0	BITTEN / CRUSHED SNAKE NOS	Snake	Y	Foot/ankle	1	N	0	N	N	N	N
1034		14 Mar 2020	3	2020	14 Mar 2020	32	F	122	7.6	4.23	269	no comment	29	2.4	0.5	1.1	209	75		N	N	N	N	N	NA	N	Nausea	N	nad	nad	0	0	0	0	0	0	0	0	BITTEN / CRUSHED SNAKE NOS	Snake	Y	Foot/ankle	1	N	0	N	N	N	N
1035		13 Nov 2015	11	2015	14 Nov 2015	35	F	114	6.3	3.09	229	no comment	32	1.8	0.3	1.1	317	57		N	N	N	N	N	not done	N	N	N	nad	nad	0	0	0	0	0	0	0	0	BITTEN / CRUSHED SNAKE NOS	Snake	Y	Foot/ankle	1	N	0	N	N	N	N
1036		13 Oct 2019	10	2019	14 Oct 2019	35	F	132	8.8	3.64	243	BFR no fragmented red cells	26	2.6	0.3	1.1	226	50		N	N	N	N	N	NA	N	Nausea	N	nad	nad	0	0	0	0	0	0	0	0	BITTEN / CRUSHED SNAKE NOS	Snake	Y	Foot/ankle	1	N	0	N	N	N	N
1037		23 Sep 2016	9	2016	24 Sep 2016	36	F	122	9.9	5.73	328	no comment	31	1.9	0.7	1.1	60	57		N	N	N	N	N	not done	N	pain at site	N	nad	nad	0	0	0	0	0	0	0	0	BITTEN / CRUSHED SNAKE NOS	Snake	Y	Foot/ankle	1	N	0	N	N	N	N
1038		04 Apr 2015	4	2015	04 Apr 2015	38	F	115	5.5	2.12	196	BFR no fragmented red cells	33	2.4		1.1	142	63		N	N	N	N	N	not done	N	N	N	nad	nad	0	0	0	0	0	0	0	0	BITTEN / CRUSHED SNAKE NOS	Snake	Y	Foot/ankle	1	N	0	N	N	N	N
1039		28 Feb 2015	2	2015	28 Feb 2015	39	F	117	10.0	6.35	217	no comment	30	2.7	1.0	1.2	106	58		N	N	N	N	N	not done	N	N	N	nad	nad	0	0	0	0	0	0	0	0	BITTEN / CRUSHED SNAKE NOS	Snake	Y	Foot/ankle	1	N	0	N	N	N	N
1040		10 Dec 2016	12	2016	10 Dec 2016	39	F	138	6.9	3.42	299	no comment	33	3.1		1.1	125	55		N	N	N	N	N	not done	N	N	N	nad	nad	0	0	0	0	0	0	0	0	BITTEN / CRUSHED SNAKE NOS	Snake	Y	Foot/ankle	1	N	0	N	N	N	N
1041		24 Dec 2018	12	2018	24 Dec 2018	39	F	137	7.9	4.24	182	BFR no fragmented red cells	29	3.6	0.9	1.1	163	62		N	N	N	N	N	NA	N	N	N	nad	nad	0	0	0	0	0	0	0	0	BITTEN / CRUSHED SNAKE NOS	Snake	Y	Foot/ankle	1	N	0	N	N	N	N
1042		20 Apr 2019	4	2019	21 Apr 2019	39	F	114	9.9	8.16	242	no comment	23	2.4	0.5	1.0	155	65		N	N	N	N	N	NA	N	N	N	nad	nad	0	0	0	0	0	0	0	0	BITTEN / CRUSHED SNAKE NOS	Snake	Y	Foot/ankle	1	N	0	N	N	N	N
1043		03 Nov 2017	11	2017	04 Nov 2017	40	F	122	5.5	2.56	210	no comment	32	2.1	0.3	1.1	128	76		N	N	N	N	N	NA	N	N	N	nad	nad	0	0	0	0	0	0	0	0	BITTEN / CRUSHED SNAKE NOS	Snake	Y	Foot/ankle	1	N	0	N	N	N	N
1044		11 Sep 2016	9	2016	11 Sep 2016	41	F	131	9.0	4.87	231	no comment	31	2.7	0.7	1.0	84	63		N	N	N	N	N	not done	N	N	N	nad	nad	0	0	0	0	0	0	0	0	BITTEN / CRUSHED SNAKE NOS	Snake	Y	Foot/ankle	1	N	0	N	N	N	N
1045		07 Oct 2017	10	2017	07 Oct 2017	41	F	133	7.6	4.42	285	no comment	26	4.1	0.6	1.2	91	53		N	N	N	N	N	NA	N	N	N	nad	nad	0	0	0	0	0	0	0	0	BITTEN / CRUSHED SNAKE NOS	Snake	Y	Foot/ankle	1	N	0	N	N	N	N
1046		23 Feb 2017	2	2017	23 Feb 2017	42	F	141	7.9	3.33	221	no comment	23	2.0	0.3	1.0	280	64		N	N	N	N	N	NA	N	N	N	nad	nad	0	0	0	0	0	0	0	0	BITTEN / CRUSHED SNAKE NOS	Snake	Y	Foot/ankle	1	N	0	N	N	N	N
1047		24 Jan 2019	1	2019	25 Jan 2019	46	F	122	8.1	4.22	186	no comment	26	2.5	0.3	1.0	77	64		N	N	N	N	N	NA	N	N	N	nad	nad	0	0	0	0	0	0	0	0	BITTEN / CRUSHED SNAKE NOS	Snake	Y	Foot/ankle	1	N	0	N	N	N	N
1048		09 Apr 2015	4	2015	10 Apr 2015	48	F	130	8.7	4.72	270	no comment	28	2.9	1.7	1.0	79	78		N	Y	N	N	N	not done	N	some local pain and swelling, not infected	N	nad	nad	0	0	0	0	0	0	0	0	BITTEN / CRUSHED SNAKE NOS	Snake	Y	Foot/ankle	1	N	0	N	N	N	N
1049		22 Jan 2017	1	2017	22 Jan 2017	50	F	112	5.6	3.72	186	no comment	30	3.5		1.1	187	61		N	N	N	N	N	NA	N	Nausea	N	nad	nad	0	0	0	0	0	0	0	0	BITTEN / CRUSHED SNAKE NOS	Snake	Y	Foot/ankle	1	N	0	N	N	N	N
1050		02 Jan 2020	1	2020	02 Jan 2020	50	F	124	7.1	3.71	239	no comment	28	2.1	0.3	0.9	124	73		N	N	N	N	N	NA	N	Dizzy	N	nad	nad	0	0	0	0	0	0	0	0	BITTEN / CRUSHED SNAKE NOS	Snake	Y	Foot/ankle	1	N	0	N	N	N	N
1051		28 Sep 2016	9	2016	28 Sep 2016	51	F	133	12.0	7.42	277	BFR no fragmented red cells	28	4.7	0.2	1.0	60	70		N	N	N	N	N	not done	N	lip paraesthesia and palpitations	N	nad	nad	0	0	0	0	0	0	0	0	BITTEN / CRUSHED SNAKE NOS	Snake	Y	Foot/ankle	1	N	0	N	N	N	N
1052		08 Jan 2017	1	2017	09 Jan 2017	51	F	134	6.6	3.5	251	no comment	32	3.8		1.1	99	69		N	N	N	N	N	not done	N	N	N	nad	nad	0	0	0	0	0	0	0	0	BITTEN / CRUSHED SNAKE NOS	Snake	Y	Foot/ankle	1	N	0	N	N	N	N
1053		04 Aug 2017	8	2017	04 Aug 2017	51	F	144	10.7	7.69	206	no comment	26	3.5	0.7	1.0	106	53		N	N	N	N	N	NA	N	N	N	nad	nad	0	0	0	0	0	0	0	0	BITTEN / CRUSHED SNAKE NOS	Snake	Y	Foot/ankle	1	N	0	N	N	N	N
1054		06 Mar 2015	3	2015	06 Mar 2015	52	F	127	5.2	2.76	165	no comment	28	2.2	0.1	1.1	198	84		N	N	N	N	N	not done	N	N	N	nad	nad	0	0	0	0	0	0	0	0	BITTEN / CRUSHED SNAKE NOS	Snake	Y	Foot/ankle	1	N	0	N	N	N	N
1055		18 Dec 2017	12	2017	19 Dec 2017	52	F	124	8.9	6.49	281	no comment	29	2.4	2.1	1.1	54	69		N	N	N	N	N	NA	N	N	N	nad	nad	0	0	0	0	0	0	0	0	BITTEN / CRUSHED SNAKE NOS	Snake	Y	Foot/ankle	1	N	0	N	N	N	N
1056		23 Jan 2020	1	2020	24 Jan 2020	53	F	131	5.4	3.05	245	no comment	29	2.1	0.2	0.9	95	65		N	N	N	N	N	NA	N	N	N	nad	nad	0	0	0	0	0	0	0	0	BITTEN / CRUSHED SNAKE NOS	Snake	Y	Foot/ankle	1	N	0	N	N	N	N
1057		02 Feb 2015	2	2015	02 Feb 2015	54	F	121	6.3	3.47	168	no comment	32	2.8	0.5	1.1	206	69		N	N	N	N	N	not done	N	N	N	nad	nad	0	0	0	0	0	0	0	0	BITTEN / CRUSHED SNAKE NOS	Snake	Y	Foot/ankle	1	N	0	N	N	N	N
1058		14 Feb 2018	2	2018	14 Feb 2018	54	F	130	9.0	3.39	298	no comment	27	2.8	0.5	0.9	120	65		N	N	N	N	N	NA	N	N	N	nad	nad	0	0	0	0	0	0	0	0	BITTEN / CRUSHED SNAKE NOS	Snake	Y	Foot/ankle	1	N	0	N	N	N	N
1059		30 Oct 2020	10	2020	30 Oct 2020	54	F	119	8.4	4.96	251	no comment	34	2.8	0.6	1.0	135	58		N	N	N	N	N	NA	N	N	N	nad	nad	0	0	0	0	0	0	0	0	BITTEN / CRUSHED SNAKE NOS	Snake	Y	Foot/ankle	1	N	0	N	N	N	N
1060		08 Feb 2015	2	2015	08 Feb 2015	55	F	149	8.1	3.94	163	no comment	23	3.2	0.9	0.9	33	56		N	N	N	N	N	not done	N	headache	N	nad	nad	0	0	0	0	0	0	0	0	BITTEN / CRUSHED SNAKE NOS	Snake	Y	Foot/ankle	1	N	0	N	N	N	N
1061		26 Sep 2016	9	2016	26 Sep 2016	55	F	144	6.9	3.43	197	no comment	30	4.0	0.7	1.1	115	89		N	N	N	N	N	not done	N	N	N	nad	nad	0	0	0	0	0	0	0	0	BITTEN / CRUSHED SNAKE NOS	Snake	Y	Foot/ankle	1	N	0	N	N	N	N
1062		12 Jan 2018	1	2018	13 Jan 2018	55	F	158	8.1	4.27	197	no comment	28	2.8		1.0	110	51		N	N	N	N	N	NA	N	N	N	nad	nad	0	0	0	0	0	0	0	0	BITTEN / CRUSHED SNAKE NOS	Snake	Y	Foot/ankle	1	N	0	N	N	N	N
1063		05 May 2016	5	2016	06 May 2016	56	F	133	4.3	1.69	290	no comment	23	2.2	1.2	1.0	62	84		N	Y	N	N	N	not done	N	N	N	nad	nad	0	0	0	0	0	0	0	0	BITTEN / CRUSHED SNAKE NOS	Snake	Y	Foot/ankle	1	N	0	N	N	N	N
1064		23 Nov 2019	11	2019	24 Nov 2019	58	F	124	5.6	2.71	226	BFR no fragmented red cells	28	3.4	0.5	1.1	178	59		N	N	N	N	N	NA	N	Headache, diaphoresis	N	nad	nad	0	0	0	0	0	0	0	0	BITTEN / CRUSHED SNAKE NOS	Snake	Y	Foot/ankle	1	N	0	N	N	N	N
1065		14 Feb 2017	2	2017	14 Feb 2017	59	F	128	11.6	6.64	232	no comment	29	2.1	0.3	0.9	82	110		N	N	N	N	N	NA	N	Nausea	N	nad	nad	0	0	0	0	0	0	0	0	BITTEN / CRUSHED SNAKE NOS	Snake	Y	Foot/ankle	1	N	0	N	N	N	N
1066		07 Apr 2020	4	2020	07 Apr 2020	59	F	125	10.2	4.84	163	BFR no fragmented red cells	27	3.2	0.9	0.9	161	82		N	N	N	N	N	NA	N	Pain	N	nad	nad	0	0	0	0	0	0	0	0	BITTEN / CRUSHED SNAKE NOS	Snake	Y	Foot/ankle	1	N	0	N	N	N	N
1067		09 Feb 2019	2	2019	09 Feb 2019	60	F	140	6.9	2.88	217	no comment	29	2.7	0.3	1.0	202	122		N	N	N	N	N	NA	N	N	N	nad	nad	0	0	0	0	0	0	0	0	BITTEN / CRUSHED SNAKE NOS	Snake	Y	Foot/ankle	1	N	0	N	N	N	N
1068		12 Oct 2016	10	2016	13 Oct 2016	61	F	130	6.7	4.39	272	no comment	25	3.4		1.0	190	67		N	N	N	N	N	not done	N	soreness behind right knee/ right groin	N	nad	nad	0	0	0	0	0	0	0	0	BITTEN / CRUSHED SNAKE NOS	Snake	Y	Foot/ankle	1	N	0	N	N	N	N
1069		03 Dec 2018	12	2018	03 Dec 2018	62	F	139	6.4	3.23	254	BFR no fragmented red cells	26	2.9	0.1	1.0	119	62		N	N	N	N	N	NA	N	N	N	nad	nad	0	0	0	0	0	0	0	0	BITTEN / CRUSHED SNAKE NOS	Snake	Y	Foot/ankle	1	N	0	N	N	N	N
1070		25 Jun 2019	6	2019	25 Jun 2019	63	F	135	12.0	10.09	278	no comment	28	3.3	3.8	0.9	135	95		N	N	N	N	N	NA	N	Nausea	N	nad	nad	0	0	0	0	0	0	0	0	BITTEN / CRUSHED SNAKE NOS	Snake	Y	Foot/ankle	1	N	0	N	N	N	N
1071		17 Mar 2020	3	2020	17 Mar 2020	66	F	119	7.0	2.69	229	no comment	26	2.1	1.7	1.1	115	70		N	N	N	N	N	NA	N	N	N	nad	nad	0	0	0	0	0	0	0	0	BITTEN / CRUSHED SNAKE NOS	Snake	Y	Foot/ankle	1	N	0	N	N	N	N
1072		24 Jun 2014	6	2014	25 Jun 2014	67	F	124	7.9	3.75	319	no comment	31	2.4	0.6	1.0	125	78		N	N	N	N	N	not done	N	?speech slurred subjectively	N	nad	nad	0	0	0	0	0	0	0	0	BITTEN / CRUSHED SNAKE NOS	Snake	Y	Foot/ankle	1	N	0	N	N	N	N
1073		05 Oct 2014	10	2014	06 Oct 2014	67	F	147	7.7	4.48	172	no comment	25	3.3	0.6	0.9	109	90		N	N	N	N	N	not done	N	bite, nausea	N	nad	nad	0	0	0	0	0	0	0	0	BITTEN / CRUSHED SNAKE NOS	Snake	Y	Foot/ankle	1	N	0	N	N	N	N
1074		30 Mar 2019	3	2019	30 Mar 2019	68	F	121	9.1	4.9	202	no comment	26	2.5	0.7	0.9	160	67	2	N	N	N	N	N	NA	N	N	N	nad	nad	0	0	0	0	0	0	0	0	BITTEN / CRUSHED SNAKE NOS	Snake	Y	Foot/ankle	1	N	0	N	N	N	N
1075		23 Dec 2019	12	2019	23 Dec 2019	69	F	119	6.0	2.59	196	BFR no fragmented red cells	29	2.6	0.3	1.0	124	61		N	N	N	N	N	NA	N	N	N	nad	nad	0	0	0	0	0	0	0	0	BITTEN / CRUSHED SNAKE NOS	Snake	Y	Foot/ankle	1	N	0	N	N	N	N
1076		31 Jan 2017	1	2017	31 Jan 2017	4	M	115	7.8	3.43	248	no comment	32	3.7	4.5	1.2	108	43		N	N	N	N	N	NA	N	N	N	nad	nad	0	0	0	0	0	0	0	0	BITTEN / CRUSHED SNAKE NOS	Snake	Y	Foot/ankle	1	N	0	N	N	N	N
1077		26 Nov 2015	11	2015	26 Nov 2015	6	M					no comment	39	2.6	0.2	1.2	152	29		N	N	N	N	N	not done	N	mild distress	N	nad	nad	0	0	0	0	0	0	0	0	BITTEN / CRUSHED SNAKE NOS	Snake	Y	Foot/ankle	1	N	0	N	N	N	N
1078		28 Apr 2016	4	2016	28 Apr 2016	6	M	125	11.8	4.56	197	no comment	30	2.3	0.3	1.1	153	36		N	N	N	N	N	not done	N	N	N	nad	nad	0	0	0	0	0	0	0	0	BITTEN / CRUSHED SNAKE NOS	Snake	Y	Foot/ankle	1	N	0	N	N	N	N
1079		08 Feb 2019	2	2019	08 Feb 2019	6	M	112	8.6	3.3	469	BFR no fragmented red cells	37	1.7	0.2	1.2	91	34		N	N	N	N	N	NA	N	N	N	nad	nad	0	0	0	0	0	0	0	0	BITTEN / CRUSHED SNAKE NOS	Snake	Y	Foot/ankle	1	N	0	N	N	N	N
1080		01 Jan 2014	1	2014	02 Jan 2014	8	M	125	7.5	3.65	288	no comment	34	2.2	0.6	1.2	251	39		N	N	N	N	N	not done	N	N	N	nad	nad	0	0	0	0	0	0	0	0	BITTEN / CRUSHED SNAKE NOS	Snake	Y	Foot/ankle	1	N	0	N	N	N	N
1081		17 Nov 2016	11	2016	17 Nov 2016	10	M	131	6.1	2.65	267	no comment	38	3.3		1.2	120	47		N	N	N	N	N	not done	N	N	N	nad	nad	0	0	0	0	0	0	0	0	BITTEN / CRUSHED SNAKE NOS	Snake	Y	Foot/ankle	1	N	0	N	N	N	N
1082		02 Apr 2017	4	2017	03 Apr 2017	11	M	121	8.3	4.63	298	no comment	29	2.9	0.3	1.3	190	47		N	N	N	N	N	NA	N	N	N	nad	nad	0	0	0	0	0	0	0	0	BITTEN / CRUSHED SNAKE NOS	Snake	Y	Foot/ankle	1	N	0	N	N	N	N
1083		04 Dec 2014	12	2014	04 Dec 2014	12	M	147	5.8	2.78	206	no comment	32	2.2	0.5	1.1	254	45		N	Y	N	N	N	not done	N	nausea	N	nad	nad	0	0	0	0	0	0	0	0	BITTEN / CRUSHED SNAKE NOS	Snake	Y	Foot/ankle	1	N	0	N	N	N	N
1084		26 Mar 2017	3	2017	27 Mar 2017	12	M	114	6.6	2.9	205	no comment	28	2.4	1.2	1.0	275	62		N	N	N	N	N	NA	N	N	N	nad	nad	0	0	0	0	0	0	0	0	BITTEN / CRUSHED SNAKE NOS	Snake	Y	Foot/ankle	1	N	0	N	N	N	N
1085		03 Apr 2017	4	2017	03 Apr 2017	12	M	122	6.2	2.5	164	no comment	39	2.0	0.3	1.3	247	63		N	N	N	N	N	NA	N	N	N	nad	nad	0	0	0	0	0	0	0	0	BITTEN / CRUSHED SNAKE NOS	Snake	Y	Foot/ankle	1	N	0	N	N	N	N
1086		22 Jan 2018	1	2018	23 Jan 2018	12	M	126	9.1	4.46	372	no comment	27	2.5	0.4	1.1	138	56		N	N	N	N	N	NA	N	N	N	nad	nad	0	0	0	0	0	0	0	0	BITTEN / CRUSHED SNAKE NOS	Snake	Y	Foot/ankle	1	N	0	N	N	N	N
1087		14 Feb 2020	2	2020	15 Feb 2020	12	M	129	5.8	3.1	247	BFR no fragmented red cells	36	2.2	0.4	1.1	296	44		N	N	N	N	N	NA	N	Pain	N	nad	nad	0	0	0	0	0	0	0	0	BITTEN / CRUSHED SNAKE NOS	Snake	Y	Foot/ankle	1	N	0	N	N	N	N
1088		21 Jan 2020	1	2020	21 Jan 2020	14	M	138	11.3	7.83	243	no comment	31	1.8	0.2	1.0	425	64		N	N	N	N	N	NA	N	N	N	nad	nad	0	0	0	0	0	0	0	0	BITTEN / CRUSHED SNAKE NOS	Snake	Y	Foot/ankle	1	N	0	N	N	N	N
1089		01 Mar 2016	3	2016	02 Mar 2016	15	M	152	15.1	10.94	209	no comment	27	2.0	0.8	1.2	842	127		N	N	N	N	N	not done	N	N	N	nad	nad	0	0	0	0	0	0	0	0	BITTEN / CRUSHED SNAKE NOS	Snake	Y	Foot/ankle	1	N	0	N	N	N	N
1090		13 Apr 2020	4	2020	13 Apr 2020	15	M	136	9.6	4.15	353	no comment	30	1.9	0.4	1.3	265	74		N	N	N	N	N	NA	N	Arthralgia	N	nad	nad	0	0	0	0	0	0	0	0	BITTEN / CRUSHED SNAKE NOS	Snake	Y	Foot/ankle	1	N	0	N	N	N	N
1091		12 Apr 2019	4	2019	12 Apr 2019	16	M	150	7.6	4.11	283	BFR no fragmented red cells	30	2.7	0.4	1.3	221	68		N	N	N	N	N	NA	N	N	N	nad	nad	0	0	0	0	0	0	0	0	BITTEN / CRUSHED SNAKE NOS	Snake	Y	Foot/ankle	1	N	0	N	N	N	N
1092		19 Mar 2020	3	2020	19 Mar 2020	16	M	148	10.7	5.03	309	BFR no fragmented red cells	30	1.9	0.4	1.0	204	82		N	N	N	N	N	NA	N	N	N	nad	nad	0	0	0	0	0	0	0	0	BITTEN / CRUSHED SNAKE NOS	Snake	Y	Foot/ankle	1	N	0	N	N	N	N
1093		13 Mar 2014	3	2014	14 Mar 2014	17	M	143	8.0	6.43	186	BFR no fragmented red cells	23	2.6	0.3	1.1	171	86		N	N	N	N	N	not done	N	N	N	nad	nad	0	0	0	0	0	0	0	0	BITTEN / CRUSHED SNAKE NOS	Snake	Y	Foot/ankle	1	N	0	N	N	N	N
1094		27 Feb 2017	2	2017	27 Feb 2017	17	M	142	8.6	6.52	259	no comment	29	2.5		1.0	151	77		N	N	N	N	N	NA	N	N	N	nad	nad	0	0	0	0	0	0	0	0	BITTEN / CRUSHED SNAKE NOS	Snake	Y	Foot/ankle	1	N	0	N	N	N	N
1095		24 Feb 2019	2	2019	24 Feb 2019	17	M	157	7.2	3.95	174	no comment	28	1.8	0.5	1.2	180	73		N	N	N	N	N	NA	N	N	N	nad	nad	0	0	0	0	0	0	0	0	BITTEN / CRUSHED SNAKE NOS	Snake	Y	Foot/ankle	1	N	0	N	N	N	N
1096		07 Apr 2020	4	2020	07 Apr 2020	17	M	125	5.9	3.25	241	BFR no fragmented red cells	30	1.8		1.2	104	75		N	N	N	N	N	NA	N	N	N	nad	nad	0	0	0	0	0	0	0	0	BITTEN / CRUSHED SNAKE NOS	Snake	Y	Foot/ankle	1	N	0	N	N	N	N
1097		02 Apr 2015	4	2015	02 Apr 2015	18	M	148	9.6	2.28	243	BFR no fragmented red cells	34	3.0	1.1	1.1	60	92		N	N	N	N	N	not done	N	headache, abdo pain, nausea	N	nad	nad	0	0	0	0	0	0	0	0	BITTEN / CRUSHED SNAKE NOS	Snake	Y	Foot/ankle	1	N	0	N	N	N	N
1098		09 Nov 2014	11	2014	09 Nov 2014	19	M	143	6.5	3.85	193	no comment	36	1.9	0.1	1.1	174	57		N	N	N	N	N	not done	N	N	N	nad	nad	0	0	0	0	0	0	0	0	BITTEN / CRUSHED SNAKE NOS	Snake	Y	Foot/ankle	1	N	0	N	N	N	N
1099		25 Jun 2016	6	2016	25 Jun 2016	19	M	144	6.7	4.22	167	no comment	37	3.9	0.3	1.2	144	101		N	N	N	N	N	not done	N	abdo pain and headache	N	nad	nad	0	0	0	0	0	0	0	0	BITTEN / CRUSHED SNAKE NOS	Snake	Y	Foot/ankle	1	N	0	N	N	N	N
1100		03 Dec 2016	12	2016	04 Dec 2016	19	M	145	7.4	4.7	207	no comment	31	2.4	0.6	1.2	150	63		N	N	N	N	N	not done	N	N	N	nad	nad	0	0	0	0	0	0	0	0	BITTEN / CRUSHED SNAKE NOS	Snake	Y	Foot/ankle	1	N	0	N	N	N	N
1101		08 Feb 2019	2	2019	08 Feb 2019	19	M	140	7.1	3.28	222	no comment	35	2.2	1.0	1.0	181	85		N	N	N	N	N	NA	N	N	N	nad	nad	0	0	0	0	0	0	0	0	BITTEN / CRUSHED SNAKE NOS	Snake	Y	Foot/ankle	1	N	0	N	N	N	N
1102		12 Feb 2019	2	2019	12 Feb 2019	19	M	148	8.5	4.31	214	no comment	28	1.0	0.5	1.0	105	79		N	N	N	N	N	NA	N	N	N	nad	nad	0	0	0	0	0	0	0	0	BITTEN / CRUSHED SNAKE NOS	Snake	Y	Foot/ankle	1	N	0	N	N	N	N
1103		26 Jan 2020	1	2020	26 Jan 2020	19	M	136	13.2	10.45	232	no comment	29	2.4	0.2	1.0	331	83	1	N	N	N	N	N	NA	N	"Spaced out"	N	nad	nad	0	0	0	0	0	0	0	0	BITTEN / CRUSHED SNAKE NOS	Snake	Y	Foot/ankle	1	N	0	N	N	N	N
1104		28 May 2014	5	2014	29 May 2014	20	M	146	10.8	8.01	189	no comment	28	1.9	0.3	1.2	148	82		N	N	N	N	N	not done	N	N	N	nad	nad	0	0	0	0	0	0	0	0	BITTEN / CRUSHED SNAKE NOS	Snake	Y	Foot/ankle	1	N	0	N	N	N	N
1105		01 May 2019	5	2019	01 May 2019	21	M	145	9.9	5.45	261	BFR no fragmented red cells	26	2.3		1.1	72	76		N	N	N	N	N	NA	N	Pain	N	nad	nad	0	0	0	0	0	0	0	0	BITTEN / CRUSHED SNAKE NOS	Snake	Y	Foot/ankle	1	N	0	N	N	N	N
1106		19 Apr 2015	4	2015	20 Apr 2015	22	M	142	7.1	3.68	153	no comment	28	1.9	0.2	1.0	260	86		N	N	N	N	N	not done	N	N	N	nad	nad	0	0	0	0	0	0	0	0	BITTEN / CRUSHED SNAKE NOS	Snake	Y	Foot/ankle	1	N	0	N	N	N	N
1107		12 Oct 2017	10	2017	13 Oct 2017	22	M	136	8.2	3.87	215	no comment	33	2.0	0.5	1.2	212	93		N	N	N	N	Y	negative	N	N	N	nad	nad	0	0	0	0	0	0	0	0	BITTEN / CRUSHED SNAKE NOS	Snake	Y	Foot/ankle	1	N	0	N	N	N	N
1108		10 Mar 2018	3	2018	11 Mar 2018	23	M	155	9.2	5.29	222	no comment	32	1.6	0.3	1.1	152	97		N	N	N	N	N	NA	N	N	N	nad	nad	0	0	0	0	0	0	0	0	BITTEN / CRUSHED SNAKE NOS	Snake	Y	Foot/ankle	1	N	0	N	N	N	N
1109		05 Feb 2020	2	2020	06 Feb 2020	23	M	138	8.6	5.67	209	no comment	26	2.4	0.1	1.1	503	86		N	N	N	N	N	NA	N	N	N	nad	nad	0	0	0	0	0	0	0	0	BITTEN / CRUSHED SNAKE NOS	Snake	Y	Foot/ankle	1	N	0	N	N	N	N
1110		22 Mar 2014	3	2014	22 Mar 2014	25	M	136	9.2	6.32	259	no comment	36	1.8	0.1	1.1	185	102		N	N	N	N	N	not done	N	pain, burning, ache, paraesthesia	N	nad	nad	0	0	0	0	0	0	0	0	BITTEN / CRUSHED SNAKE NOS	Snake	Y	Foot/ankle	1	N	0	N	N	N	N
1111		11 Jan 2017	1	2017	11 Jan 2017	25	M	138	6.9	2.67	197	no comment	38	1.7	0.1	1.1	66	57		N	N	N	N	N	NA	N	N	N	nad	nad	0	0	0	0	0	0	0	0	BITTEN / CRUSHED SNAKE NOS	Snake	Y	Foot/ankle	1	N	0	N	N	N	N
1112		10 Nov 2019	11	2019	10 Nov 2019	25	M	141	8.6	6.54	227	no comment	28	1.6	0.1	1.0	227	104		N	N	N	N	N	NA	N	N	N	nad	nad	0	0	0	0	0	0	0	0	BITTEN / CRUSHED SNAKE NOS	Snake	Y	Foot/ankle	1	N	0	N	N	N	N
1113		20 Nov 2016	11	2016	21 Nov 2016	26	M	139	11.2	9.94	173	no comment	28	2.6	0.6	1.2	1690	90		N	N	N	N	N	not done	N	drowsy initially and hypoglycaemic	N	nad	nad	0	0	0	0	0	0	0	0	BITTEN / CRUSHED SNAKE NOS	Snake	Y	Foot/ankle	1	N	0	N	N	N	N
1114		19 Nov 2017	11	2017	19 Nov 2017	26	M	146	9.6	5.93	210	no comment	30	2.5	0.3	1.0	342	81		N	N	N	N	N	NA	N	Abdominal pain	N	nad	nad	0	0	0	0	0	0	0	0	BITTEN / CRUSHED SNAKE NOS	Snake	Y	Foot/ankle	1	N	0	N	N	N	N
1115		12 Aug 2017	8	2017	12 Aug 2017	28	M	138	5.9	2.84	167	no comment	30	2.8	0.9	1.0	230	72		N	N	N	N	Y	negative	N	N	N	nad	nad	0	0	0	0	0	0	0	0	BITTEN / CRUSHED SNAKE NOS	Snake	Y	Foot/ankle	1	N	0	N	N	N	N
1116		07 Jan 2018	1	2018	07 Jan 2018	28	M	145	9.0	4.58	213	no comment	32	2.5	0.5	1.0	86	91		N	N	N	N	N	NA	N	N	N	nad	nad	0	0	0	0	0	0	0	0	BITTEN / CRUSHED SNAKE NOS	Snake	Y	Foot/ankle	1	N	0	N	N	N	N
1117		14 Oct 2018	10	2018	14 Oct 2018	28	M	139	7.0	3.78	241	no comment	28	1.7	0.1	1.0	94	67		N	N	N	N	N	NA	N	N	N	nad	nad	0	0	0	0	0	0	0	0	BITTEN / CRUSHED SNAKE NOS	Snake	Y	Foot/ankle	1	N	0	N	N	N	N
1118		16 Mar 2019	3	2019	17 Mar 2019	28	M	141	6.9	5.25	186	no comment	28	2.2	0.4	1.1	282	90		N	N	N	N	N	NA	N	Pain	N	nad	nad	0	0	0	0	0	0	0	0	BITTEN / CRUSHED SNAKE NOS	Snake	Y	Foot/ankle	1	N	0	N	N	N	N
1119		24 Nov 2016	11	2016	24 Nov 2016	30	M	141	9.2	5.05	178	no comment	28	2.9	0.1	1.0	172	91		N	N	N	N	N	not done	N	N	N	nad	nad	0	0	0	0	0	0	0	0	BITTEN / CRUSHED SNAKE NOS	Snake	Y	Foot/ankle	1	N	0	N	N	N	N
1120		23 Aug 2017	8	2017	24 Aug 2017	30	M	138	6.1	3.9	207	no comment	27	2.1	0.2	0.9	339	78		N	N	N	N	N	NA	N	N	N	nad	nad	0	0	0	0	0	0	0	0	BITTEN / CRUSHED SNAKE NOS	Snake	Y	Foot/ankle	1	N	0	N	N	N	N
1121		24 Nov 2016	11	2016	24 Nov 2016	31	M	144	7.3	3.82	235	no comment	28	2.1	0.2	1.0	84	73		N	N	N	N	N	not done	N	N	N	nad	nad	0	0	0	0	0	0	0	0	BITTEN / CRUSHED SNAKE NOS	Snake	Y	Foot/ankle	1	N	0	N	N	N	N
1122		19 Jan 2020	1	2020	19 Jan 2020	31	M	151	14.5	7.13	307	BFR no fragmented red cells	29	2.4		1.1	136	84		N	N	N	N	N	NA	N	N	N	nad	nad	0	0	0	0	0	0	0	0	BITTEN / CRUSHED SNAKE NOS	Snake	Y	Foot/ankle	1	N	0	N	N	N	N
1123		24 Jan 2019	1	2019	25 Jan 2019	32	M	149	10.3	5.26	275	no comment	26	3.1	0.3	1.0	309	82		N	N	N	N	N	NA	N	N	N	nad	nad	0	0	0	0	0	0	0	0	BITTEN / CRUSHED SNAKE NOS	Snake	Y	Foot/ankle	1	N	0	N	N	N	N
1124		25 Dec 2013	12	2013	26 Dec 2013	34	M	142	7.2	3.94	181	no comment	35	2.5	0.1	1.1	119	81		N	N	N	N	Y	negative (swab from bite site in ED)	N	felt bite, vomiting	N	nad	nad	0	0	0	0	0	0	0	0	BITTEN / CRUSHED SNAKE NOS	Snake	Y	Foot/ankle	1	N	0	N	N	N	N
1125		25 Feb 2018	2	2018	25 Feb 2018	34	M	159	7.9	4.5	177	no comment	30	2.5	0.1	1.1	110	87		N	N	N	N	N	NA	N	N	N	nad	nad	0	0	0	0	0	0	0	0	BITTEN / CRUSHED SNAKE NOS	Snake	Y	Foot/ankle	1	N	0	N	N	N	N
1126		05 Dec 2018	12	2018	05 Dec 2018	34	M	157	9.1	6.64	220	BFR no fragmented red cells	30	2.7	0.1	1.0	233	74		N	N	N	N	N	NA	N	N	N	nad	nad	0	0	0	0	0	0	0	0	BITTEN / CRUSHED SNAKE NOS	Snake	Y	Foot/ankle	1	N	0	N	N	N	N
1127		11 Jan 2020	1	2020	11 Jan 2020	34	M	137	6.2	3.3	204	no comment	27	1.6	0.4	1.1	135	77		N	N	N	N	N	NA	N	N	N	nad	nad	0	0	0	0	0	0	0	0	BITTEN / CRUSHED SNAKE NOS	Snake	Y	Foot/ankle	1	N	0	N	N	N	N
1128		18 Aug 2014	8	2014	18 Aug 2014	35	M	151	7.0	3.56	172	no comment	32	4.0	1.2	1.2	149	77		N	Y	N	N	N	not done	N	tenderness to palpation, minor erythema	N	nad	nad	0	0	0	0	0	0	0	0	BITTEN / CRUSHED SNAKE NOS	Snake	Y	Foot/ankle	1	N	0	N	N	N	N
1129		15 Feb 2017	2	2017	16 Feb 2017	35	M	154	9.7	5.44	227	no comment	25	2.4	0.1	1.0	199	97		N	N	N	N	N	NA	N	N	N	nad	nad	0	0	0	0	0	0	0	0	BITTEN / CRUSHED SNAKE NOS	Snake	Y	Foot/ankle	1	N	0	N	N	N	N
1130		05 Mar 2018	3	2018	05 Mar 2018	35	M	159	5.9	3.66	210	no comment	33	2.8	0.3	1.0	394	77		N	N	N	N	N	NA	N	N	N	nad	nad	0	0	0	0	0	0	0	0	BITTEN / CRUSHED SNAKE NOS	Snake	Y	Foot/ankle	1	N	0	N	N	N	N
1131		01 Mar 2020	3	2020	02 Mar 2020	35	M	164	12.3	7.2	315	no comment	28	1.5	0.3	1.0	66	71		N	N	N	N	N	NA	N	Pain	N	nad	nad	0	0	0	0	0	0	0	0	BITTEN / CRUSHED SNAKE NOS	Snake	Y	Foot/ankle	1	N	0	N	N	N	N
1132		08 Oct 2020	10	2020	08 Oct 2020	35	M	154	12.9	7.14	256	no comment	37	2.3	0.1	1.0	110	74		N	N	N	N	N	NA	N	Vomiting, dizziness	N	nad	nad	0	0	0	0	0	0	0	0	BITTEN / CRUSHED SNAKE NOS	Snake	Y	Foot/ankle	1	N	0	N	N	N	N
1133		08 May 2019	5	2019	08 May 2019	36	M	144	8.1	5.89	240	no comment	28	1.9	0.4	1.0	116	93		N	N	N	N	N	NA	N	N	N	nad	nad	0	0	0	0	0	0	0	0	BITTEN / CRUSHED SNAKE NOS	Snake	Y	Foot/ankle	1	N	0	N	N	N	N
1134		05 Nov 2019	11	2019	06 Nov 2019	36	M	150	8.2	5.39	249	no comment	27	2.5	0.3	1.0	224	108		N	N	N	N	N	NA	N	N	N	nad	nad	0	0	0	0	0	0	0	0	BITTEN / CRUSHED SNAKE NOS	Snake	Y	Foot/ankle	1	N	0	N	N	N	N
1135		06 Mar 2014	3	2014	06 Mar 2014	37	M	147	9.3	5.04	188	no comment	33	2.5	0.7	1.1	276	71		N	N	N	N	N	not done	N	N	N	nad	nad	0	0	0	0	0	0	0	0	BITTEN / CRUSHED SNAKE NOS	Snake	Y	Foot/ankle	1	N	0	N	N	N	N
1136		08 Dec 2015	12	2015	08 Dec 2015	39	M	192	9.7	3.53	187	BFR no fragmented red cells	32	1.6		1.2	76	58	1.899999976	N	N	N	N	N	not done	N	dizzy and light-headed	N	nad	nad	0	0	0	0	0	0	0	0	BITTEN / CRUSHED SNAKE NOS	Snake	Y	Foot/ankle	1	N	0	N	N	N	N
1137		12 Mar 2016	3	2016	13 Mar 2016	40	M	142	8.1	5.15	202	no comment	27	2.9	0.1	1.0	74	78		N	N	N	N	N	not done	N	nauseous	N	nad	nad	0	0	0	0	0	0	0	0	BITTEN / CRUSHED SNAKE NOS	Snake	Y	Foot/ankle	1	N	0	N	N	N	N
1138		08 Feb 2019	2	2019	08 Feb 2019	40	M	135	8.1	5.37	211	BFR no fragmented red cells	31	2.2		1.1	256	77		N	N	N	N	N	NA	N	N	N	nad	nad	0	0	0	0	0	0	0	0	BITTEN / CRUSHED SNAKE NOS	Snake	Y	Foot/ankle	1	N	0	N	N	N	N
1139		01 Apr 2020	4	2020	02 Apr 2020	40	M	163	8.5	3.62	247	no comment	38	2.5	1.5	1.0	90	81		N	N	N	N	N	NA	N	N	N	nad	nad	0	0	0	0	0	0	0	0	BITTEN / CRUSHED SNAKE NOS	Snake	Y	Foot/ankle	1	N	0	N	N	N	N
1140		06 Mar 2017	3	2017	06 Mar 2017	41	M	139	9.4	6.75	148	no comment	30	4.1	0.4	1.1	138	74		N	N	N	N	N	NA	N	N	N	nad	nad	0	0	0	0	0	0	0	0	BITTEN / CRUSHED SNAKE NOS	Snake	Y	Foot/ankle	1	N	0	N	N	N	N
1141		22 Sep 2018	9	2018	22 Sep 2018	41	M	135	9.1	6.96	217	no comment	34	2.0	1.2	1.2	111	60		N	N	N	N	N	NA	N	N	N	nad	nad	0	0	0	0	0	0	0	0	BITTEN / CRUSHED SNAKE NOS	Snake	Y	Foot/ankle	1	N	0	N	N	N	N
1142		02 Oct 2014	10	2014	02 Oct 2014	44	M	144	8.9	5.68	182	no comment	37	2.2	0.3	1.2	132	71		N	N	N	N	N	not done	N	bite, nil else	N	nad	nad	0	0	0	0	0	0	0	0	BITTEN / CRUSHED SNAKE NOS	Snake	Y	Foot/ankle	1	N	0	N	N	N	N
1143		26 Oct 2019	10	2019	26 Oct 2019	44	M	148	10.1	5.4	332	no comment	27	2.0	0.3	1.1	147	78		N	N	N	N	N	NA	N	Nausea	N	nad	nad	0	0	0	0	0	0	0	0	BITTEN / CRUSHED SNAKE NOS	Snake	Y	Foot/ankle	1	N	0	N	N	N	N
1144		08 Jul 2015	7	2015	09 Jul 2015	45	M	164	12.9	9.99	230	no comment	31	3.1	0.1	1.2	76	78		N	N	N	N	N	not done	N	N	N	nad	nad	0	0	0	0	0	0	0	0	BITTEN / CRUSHED SNAKE NOS	Snake	Y	Foot/ankle	1	N	0	N	N	N	N
1145		22 Feb 2017	2	2017	25 Feb 2020	48	M	163	7.6	5.16	203	no comment	26	2.0	0.2	1.0	162	115		N	N	N	N	N	NA	N	N	N	nad	nad	0	0	0	0	0	0	0	0	BITTEN / CRUSHED SNAKE NOS	Snake	Y	Foot/ankle	1	N	0	N	N	N	N
1146		27 Feb 2018	2	2018	27 Feb 2018	45	M	150	9.0	5.44	282	no comment	30	2.3	0.1	1.0	107	93		N	N	N	N	N	NA	N	N	N	nad	nad	0	0	0	0	0	0	0	0	BITTEN / CRUSHED SNAKE NOS	Snake	Y	Foot/ankle	1	N	0	N	N	N	N
1147		10 Jan 2014	1	2014	10 Jan 2014	46	M	149	10.0	5.89	265	no comment	29	2.8		1.1	225	110		N	N	N	N	N	not done	N	pain at bite site	N	nad	nad	0	0	0	0	0	0	0	0	BITTEN / CRUSHED SNAKE NOS	Snake	Y	Foot/ankle	1	N	0	N	N	N	N
1148		06 May 2018	5	2018	06 May 2018	46	M	148	9.0	4.68	221	no comment	27	2.7	0.3	1.0	126	94		N	N	N	N	N	NA	N	N	N	nad	nad	0	0	0	0	0	0	0	0	BITTEN / CRUSHED SNAKE NOS	Snake	Y	Foot/ankle	1	N	0	N	N	N	N
1149		29 Dec 2018	12	2018	29 Dec 2018	46	M	144	9.5	4.8	163	BFR no fragmented red cells	28	2.6	0.3	1.1	172	90		N	N	N	N	N	NA	N	N	N	nad	nad	0	0	0	0	0	0	0	0	BITTEN / CRUSHED SNAKE NOS	Snake	Y	Foot/ankle	1	N	0	N	N	N	N
1150		20 Oct 2019	10	2019	21 Oct 2019	46	M	145	9.7	6.44	330	no comment	33	2.7	1.1	1.0	266	345		N	N	N	N	N	NA	N	N	N	nad	nad	0	0	0	0	0	0	0	0	BITTEN / CRUSHED SNAKE NOS	Snake	Y	Foot/ankle	1	N	0	N	N	N	N
1151		24 Jan 2015	1	2015	25 Jan 2015	47	M	154	8.9	6.95	258	no comment	34	3.6	0.1	1.2	294	87		N	N	N	N	N	not done	N	N	N	nad	nad	0	0	0	0	0	0	0	0	BITTEN / CRUSHED SNAKE NOS	Snake	Y	Foot/ankle	1	N	0	N	N	N	N
1152		07 May 2018	5	2018	07 May 2018	47	M	167	11.3	9.44	166	no comment	24	2.3	0.5	1.0	186	85		N	N	N	N	N	NA	N	N	N	nad	nad	0	0	0	0	0	0	0	0	BITTEN / CRUSHED SNAKE NOS	Snake	Y	Foot/ankle	1	N	0	N	N	N	N
1153		20 Feb 2019	2	2019	21 Feb 2019	47	M	148	7.9	4.49	247	no comment	28	2.5	0.3	1.0	174	81		N	N	N	N	N	NA	N	Metallic taste in mouth	N	nad	nad	0	0	0	0	0	0	0	0	BITTEN / CRUSHED SNAKE NOS	Snake	Y	Foot/ankle	1	N	0	N	N	N	N
1154		31 Oct 2019	10	2019	01 Nov 2019	47	M	140	5.3	2.56	202	no comment	29	2.2	0.3	1.0	237	67		N	N	N	N	N	NA	N	N	N	nad	nad	0	0	0	0	0	0	0	0	BITTEN / CRUSHED SNAKE NOS	Snake	Y	Foot/ankle	1	N	0	N	N	N	N
1155		06 Dec 2019	12	2019	07 Dec 2019	47	M	141	6.4	3.44	256	no comment	33	2.2	1.2	1.1	262	89		N	N	N	N	N	NA	N	N	N	nad	nad	0	0	0	0	0	0	0	0	BITTEN / CRUSHED SNAKE NOS	Snake	Y	Foot/ankle	1	N	0	N	N	N	N
1156		24 Feb 2020	2	2020	23 Feb 2017	45	M	160	8.6	5.76	187	no comment	27	3.2	0.1	1.1	349	129		N	N	N	N	N	NA	N	Nausea, pain	N	nad	nad	0	0	0	0	0	0	0	0	BITTEN / CRUSHED SNAKE NOS	Snake	Y	Foot/ankle	1	N	0	N	N	N	N
1157		14 Dec 2018	12	2018	14 Dec 2018	49	M	142	8.7	4.84	222	BFR no fragmented red cells	26	2.5	0.1	1.1	165	79		N	N	N	N	N	NA	N	N	N	nad	nad	0	0	0	0	0	0	0	0	BITTEN / CRUSHED SNAKE NOS	Snake	Y	Foot/ankle	1	N	0	N	N	N	N
1158		17 Oct 2019	10	2019	17 Oct 2019	49	M	138	9.0	4.35	299	no comment	29	3.1	0.4	1.0	213	81		N	N	N	N	N	NA	N	N	N	nad	nad	0	0	0	0	0	0	0	0	BITTEN / CRUSHED SNAKE NOS	Snake	Y	Foot/ankle	1	N	0	N	N	N	N
1159		26 Dec 2013	12	2013	26 Dec 2013	50	M	137	12.4	7.38	181	BFR no fragmented red cells	25	3.2	0.7	1.1	160	83		N	N	N	N	N	not done	N	felt bite	N	nad	nad	0	0	0	0	0	0	0	0	BITTEN / CRUSHED SNAKE NOS	Snake	Y	Foot/ankle	1	N	0	N	N	N	N
1160		29 Dec 2013	12	2013	29 Dec 2013	50	M	135	7.7	4.31	253	no comment	32	3.2		1.1	188	77		N	N	N	N	N	not done	N	felt bite	N	nad	nad	0	0	0	0	0	0	0	0	BITTEN / CRUSHED SNAKE NOS	Snake	Y	Foot/ankle	1	N	0	N	N	N	N
1161		12 Mar 2016	3	2016	12 Mar 2016	50	M	125	8.4	3.19	266	no comment	27	2.5	0.2	0.9	198	71		N	N	N	N	N	not done	N	N	N	nad	nad	0	0	0	0	0	0	0	0	BITTEN / CRUSHED SNAKE NOS	Snake	Y	Foot/ankle	1	N	0	N	N	N	N
1162		27 Feb 2018	2	2018	27 Feb 2018	50	M	134	6.1	2.53	214	no comment	28	2.6	0.1	1.0	268	96		N	N	N	N	N	NA	N	N	N	nad	nad	0	0	0	0	0	0	0	0	BITTEN / CRUSHED SNAKE NOS	Snake	Y	Foot/ankle	1	N	0	N	N	N	N
1163		02 Mar 2020	3	2020	02 Mar 2020	50	M	152	6.7	4.56	89	BFR no fragmented red cells	31	2.0	0.3	0.9	80	91		N	N	N	N	N	NA	N	N	N	nad	nad	0	0	0	0	0	0	0	0	BITTEN / CRUSHED SNAKE NOS	Snake	Y	Foot/ankle	1	N	0	N	N	N	N
1164		03 Jan 2016	1	2016	04 Jan 2016	51	M	133	5.4	3.14	183	no comment	23	2.5		0.9	206	79		N	N	N	N	N	not done	N	panicked and sweaty	N	nad	nad	0	0	0	0	0	0	0	0	BITTEN / CRUSHED SNAKE NOS	Snake	Y	Foot/ankle	1	N	0	N	N	N	N
1165		25 Feb 2020	2	2020	25 Feb 2020	51	M	135	6.9	4.26	233	no comment	25	2.3	1.7	0.9	194	84		N	N	N	N	N	NA	N	N	N	nad	nad	0	0	0	0	0	0	0	0	BITTEN / CRUSHED SNAKE NOS	Snake	Y	Foot/ankle	1	N	0	N	N	N	N
1166		26 Mar 2015	3	2015	26 Mar 2015	52	M	148	11.9	6.21	259	no comment	36	3.3	0.5	1.0	132	117		N	N	N	N	N	not done	N	N	N	nad	nad	0	0	0	0	0	0	0	0	BITTEN / CRUSHED SNAKE NOS	Snake	Y	Foot/ankle	1	N	0	N	N	N	N
1167		14 Jan 2019	1	2019	14 Jan 2019	52	M	152	8.3	3.75	193	no comment	28	3.4	0.3	1.0	115	100		N	N	N	N	N	NA	N	N	N	nad	nad	0	0	0	0	0	0	0	0	BITTEN / CRUSHED SNAKE NOS	Snake	Y	Foot/ankle	1	N	0	N	N	N	N
1168		24 Jan 2017	1	2017	25 Jan 2017	53	M	135	5.1	2.51	191	no comment	32	2.9		1.1	88	85		N	N	N	N	N	NA	N	Itch	N	nad	nad	0	0	0	0	0	0	0	0	BITTEN / CRUSHED SNAKE NOS	Snake	Y	Foot/ankle	1	N	0	N	N	N	N
1169		20 Jan 2019	1	2019	20 Jan 2019	53	M	135	5.3	3.36	171	no comment	28	2.1	0.1	1.0	137	64		N	N	N	N	N	NA	N	N	N	nad	nad	0	0	0	0	0	0	0	0	BITTEN / CRUSHED SNAKE NOS	Snake	Y	Foot/ankle	1	N	0	N	N	N	N
1170		04 Apr 2017	4	2017	04 Apr 2017	55	M	153	9.6	4.99	221	no comment	24	2.7		1.1	212	88		N	N	N	N	N	NA	N	N	N	nad	nad	0	0	0	0	0	0	0	0	BITTEN / CRUSHED SNAKE NOS	Snake	Y	Foot/ankle	1	N	0	N	N	N	N
1171		05 Jan 2014	1	2014	06 Jan 2014	56	M	122	5.3	2.9	194	no comment	30	2.3		1.1	230	83		N	N	N	N	N	not done	N	felt bite after stood on snake	N	nad	nad	0	0	0	0	0	0	0	0	BITTEN / CRUSHED SNAKE NOS	Snake	Y	Foot/ankle	1	N	0	N	N	N	N
1172		26 Nov 2016	11	2016	26 Nov 2016	56	M	147	6.2	3.62	177	no comment	29	3.1	1.2	1.1	105	63		N	N	N	N	N	not done	N	pain at site	N	nad	nad	0	0	0	0	0	0	0	0	BITTEN / CRUSHED SNAKE NOS	Snake	Y	Foot/ankle	1	N	0	N	N	N	N
1173		08 Jan 2017	1	2017	08 Jan 2017	56	M	144	7.6	4.46	214	no comment	28	3.4	1.1	1.1	193	72		N	N	N	N	N	not done	N	N	N	nad	nad	0	0	0	0	0	0	0	0	BITTEN / CRUSHED SNAKE NOS	Snake	Y	Foot/ankle	1	N	0	N	N	N	N
1174		30 Mar 2015	3	2015	31 Mar 2015	57	M	141	5.7	3.08	132	no comment	33	2.3	0.3	1.2	156	101		N	N	N	N	N	not done	N	N	N	nad	nad	0	0	0	0	0	0	0	0	BITTEN / CRUSHED SNAKE NOS	Snake	Y	Foot/ankle	1	N	0	N	N	N	N
1175		25 Dec 2014	12	2014	25 Dec 2014	58	M	136	6.4	2.38	247	BFR no fragmented red cells	30	3.2	0.3	1.0	190	61		N	N	N	N	N	not done	N	N	N	nad	nad	0	0	0	0	0	0	0	0	BITTEN / CRUSHED SNAKE NOS	Snake	Y	Foot/ankle	1	N	0	N	N	N	N
1176		24 Oct 2018	10	2018	24 Oct 2018	58	M	140	9.5	6.06	247	no comment	31	2.8	0.3	1.0	121	94		N	N	N	N	N	NA	N	Dizzy	N	nad	nad	0	0	0	0	0	0	0	0	BITTEN / CRUSHED SNAKE NOS	Snake	Y	Foot/ankle	1	N	0	N	N	N	N
1177		29 Mar 2016	3	2016	30 Mar 2016	59	M	154	7.2	4.48	236	no comment	30	2.7	0.1	1.0	126	88		N	N	N	N	N	not done	N	N	N	nad	nad	0	0	0	0	0	0	0	0	BITTEN / CRUSHED SNAKE NOS	Snake	Y	Foot/ankle	1	N	0	N	N	N	N
1178		16 Oct 2016	10	2016	16 Oct 2016	62	M	151	9.0	5.67	170	no comment	24	4.1		1.0	91	91		N	N	N	N	N	not done	N	N	N	nad	nad	0	0	0	0	0	0	0	0	BITTEN / CRUSHED SNAKE NOS	Snake	Y	Foot/ankle	1	N	0	N	N	N	N
1179		01 Dec 2014	12	2014	01 Dec 2014	64	M	135	6.9	4.16	208	no comment	28	2.7	0.4	1.1	191	95		N	N	N	N	N	not done	N	mild headache	N	nad	nad	0	0	0	0	0	0	0	0	BITTEN / CRUSHED SNAKE NOS	Snake	Y	Foot/ankle	1	N	0	N	N	N	N
1180		09 Oct 2019	10	2019	10 Oct 2019	64	M	137	7.4	4.91	232	no comment	26	2.8	0.4	1.1	173	59		N	N	N	N	N	NA	N	N	N	nad	nad	0	0	0	0	0	0	0	0	BITTEN / CRUSHED SNAKE NOS	Snake	Y	Foot/ankle	1	N	0	N	N	N	N
1181		24 Oct 2019	10	2019	24 Oct 2019	64	M	129	5.6	2.74	209	no comment	32	3.0	1.3	1.1	142	66		N	N	N	N	N	NA	N	N	N	nad	nad	0	0	0	0	0	0	0	0	BITTEN / CRUSHED SNAKE NOS	Snake	Y	Foot/ankle	1	N	0	N	N	N	N
1182		08 Mar 2016	3	2016	09 Mar 2016	66	M	143	11.9	9	188	no comment	30	2.7	0.3	1.0	468	75		N	Y	N	N	N	not done	N	anxious, pain	N	nad	nad	0	0	0	0	0	0	0	0	BITTEN / CRUSHED SNAKE NOS	Snake	Y	Foot/ankle	1	N	0	N	N	N	N
1183		13 Aug 2018	8	2018	14 Aug 2018	67	M	134	6.2	3.81	170	no comment	26	2.3	7.6	0.9	126	107		N	N	N	N	N	NA	N	N	N	nad	nad	0	0	0	0	0	0	0	0	BITTEN / CRUSHED SNAKE NOS	Snake	Y	Foot/ankle	1	N	0	N	N	N	N
1184		11 Oct 2018	10	2018	12 Oct 2018	70	M	138	6.9	5.47	277	no comment	30	3.4	3.4	1.0	95	71		N	N	N	N	N	NA	N	N	N	nad	nad	0	0	0	0	0	0	0	0	BITTEN / CRUSHED SNAKE NOS	Snake	Y	Foot/ankle	1	N	0	N	N	N	N
1185		02 Apr 2019	4	2019	02 Apr 2019	70	M	126	9.7	4.39	255	no comment	26	2.6	0.8	1.0	93	93		N	N	N	N	N	NA	N	N	N	nad	nad	0	0	0	0	0	0	0	0	BITTEN / CRUSHED SNAKE NOS	Snake	Y	Foot/ankle	1	N	0	N	N	N	N
1186		13 Mar 2017	3	2017	13 Mar 2017	72	M	157	9.0	4.96	188	no comment	30	3.6	0.6	1.1	48	106		N	N	N	N	N	NA	N	N	N	nad	nad	0	0	0	0	0	0	0	0	BITTEN / CRUSHED SNAKE NOS	Snake	Y	Foot/ankle	1	N	0	N	N	N	N
1187		31 Oct 2014	10	2014	01 Nov 2014	93	M	126	6.2	4.38	147	no comment	30	3.1	6.2	1.1	163	64		N	N	N	N	Y	negative	N	N	N	nad	nad	0	0	0	0	0	0	0	0	BITTEN / CRUSHED SNAKE NOS	Snake	Y	Foot/ankle	1	N	0	N	N	N	N
1188		03 Jan 2017	1	2017	04 Jan 2017	7	F	134	8.5	3.92	238	no comment	33	2.0	0.1	1.1	109	37		N	N	N	N	N	not done	N	N	N	nad	nad	0	0	0	0	0	0	0	0	BITTEN OR CRUSHED BY NONVENOMOUS SNAKE	Snake	Y	Foot/ankle	1	N	0	N	N	N	N
1189		16 Jan 2019	1	2019	17 Jan 2019	10	F	121	9.7	6.69	302	no comment	30	3.2	0.6	1.1	215	47		N	N	N	N	N	NA	N	N	N	nad	nad	0	0	0	0	0	0	0	0	BITTEN OR CRUSHED BY NONVENOMOUS SNAKE	Snake	Y	Foot/ankle	1	N	0	N	N	N	N
1190		11 Jun 2018	6	2018	12 Jun 2018	19	F	143	10.2	5.64	317	no comment	30	2.3	0.1	1.0	244	56		N	N	N	N	N	NA	N	N	N	nad	nad	0	0	0	0	0	0	0	0	BITTEN OR CRUSHED BY NONVENOMOUS SNAKE	Snake	Y	Foot/ankle	1	N	0	N	N	N	N
1191		22 Dec 2013	12	2013	22 Dec 2013	31	F	132	7.1	3.75	189	no comment	26	3.3	0.2	1.1	180	60		N	N	N	N	N	not done	N	felt sting, saw 2 small puncture marks	N	nad	nad	0	0	0	0	0	0	0	0	BITTEN OR CRUSHED BY NONVENOMOUS SNAKE	Snake	Y	Foot/ankle	1	N	0	N	N	N	N
1192		14 Mar 2019	3	2019	14 Mar 2019	40	F	132	8.8	5.03	228	no comment	29	2.1		1.1	79	73		N	N	N	N	N	NA	N	N	N	nad	nad	0	0	0	0	0	0	0	0	BITTEN OR CRUSHED BY NONVENOMOUS SNAKE	Snake	Y	Foot/ankle	1	N	0	N	N	N	N
1193		07 Mar 2015	3	2015	08 Mar 2015	43	F	125	6.7	3.98	192	no comment	29	2.2	0.1	1.0	46	51		N	N	N	N	N	not done	N	N	N	nad	nad	0	0	0	0	0	0	0	0	BITTEN OR CRUSHED BY NONVENOMOUS SNAKE	Snake	Y	Foot/ankle	1	N	0	N	N	N	N
1194		11 Feb 2018	2	2018	11 Feb 2018	49	F	127	5.4	2.76	123	no comment	27	2.3	0.4	1.1	98	73		N	N	N	N	N	NA	N	N	N	nad	nad	0	0	0	0	0	0	0	0	BITTEN OR CRUSHED BY NONVENOMOUS SNAKE	Snake	Y	Foot/ankle	1	N	0	N	N	N	N
1195		24 Feb 2015	2	2015	24 Feb 2015	71	F	133	4.4	1.82	227	no comment	32	3.3	0.3	1.0	92	67		N	N	N	N	N	not done	N	N	N	nad	nad	0	0	0	0	0	0	0	0	BITTEN OR CRUSHED BY NONVENOMOUS SNAKE	Snake	Y	Foot/ankle	1	N	0	N	N	N	N
1196		26 Sep 2018	9	2018	26 Sep 2018	14	M	139	7.2	3.5	211	no comment	34	2.1	0.1	1.2	239	71		N	N	N	N	N	NA	N	N	N	nad	nad	0	0	0	0	0	0	0	0	BITTEN OR CRUSHED BY NONVENOMOUS SNAKE	Snake	Y	Foot/ankle	1	N	0	N	N	N	N
1197		11 Feb 2017	2	2017	11 Feb 2017	15	M	132	8.7	4.26	213	no comment	36	2.5	0.1	1.2	671	88		N	N	N	N	N	NA	N	N	N	nad	nad	0	0	0	0	0	0	0	0	BITTEN OR CRUSHED BY NONVENOMOUS SNAKE	Snake	Y	Foot/ankle	1	N	0	N	N	N	N
1198		23 Sep 2017	9	2017	23 Sep 2017	16	M	129	8.6	4.9	231	no comment	30	2.3	0.5	1.1	132	83		N	N	N	N	N	NA	N	N	N	nad	nad	0	0	0	0	0	0	0	0	BITTEN OR CRUSHED BY NONVENOMOUS SNAKE	Snake	Y	Foot/ankle	1	N	0	N	N	N	N
1199		18 Jun 2015	6	2015	18 Jun 2015	21	M	137	5.2	3.16	158	no comment	28	3.0	0.2	1.0	493	74		N	N	N	N	N	not done	N	N	N	nad	nad	0	0	0	0	0	0	0	0	BITTEN OR CRUSHED BY NONVENOMOUS SNAKE	Snake	Y	Foot/ankle	1	N	0	N	N	N	N
1200		07 Mar 2019	3	2019	07 Mar 2019	21	M	149	10.5	5.2	241	no comment	30	2.3	0.1	1.1	93	64		N	Y	N	N	N	NA	N	Drowsy	N	nad	nad	0	0	0	0	0	0	0	0	BITTEN OR CRUSHED BY NONVENOMOUS SNAKE	Snake	Y	Foot/ankle	1	N	0	N	N	N	N
1201		08 Mar 2014	3	2014	09 Mar 2014	25	M	143	7.6	3.46	249	no comment	30	1.6		1.0	409	132		N	N	N	N	N	not done	N	N	N	nad	nad	0	0	0	0	0	0	0	0	BITTEN OR CRUSHED BY NONVENOMOUS SNAKE	Snake	Y	Foot/ankle	1	N	0	N	N	N	N
1202		20 Jun 2014	6	2014	20 Jun 2014	38	M	160	14.4	9.71	306	no comment	29	2.4		1.0	213	92		N	N	N	N	N	not done	N	minor pain	N	nad	nad	0	0	0	0	0	0	0	0	BITTEN OR CRUSHED BY NONVENOMOUS SNAKE	Snake	Y	Foot/ankle	1	N	0	N	N	N	N
1203		09 Jun 2017	6	2017	09 Jun 2017	42	M	135	9.6	4.6	272	no comment	30	4.2	0.3	1.1	557	81		N	N	N	N	N	NA	N	Nausea, abdominal pain	N	nad	nad	0	0	0	0	0	0	0	0	BITTEN OR CRUSHED BY NONVENOMOUS SNAKE	Snake	Y	Foot/ankle	1	N	0	N	N	N	N
1204		04 Mar 2017	3	2017	04 Mar 2017	46	M	151	9.5	6.14	198	no comment	27	2.9	0.3	1.0	239	116		N	N	N	N	N	NA	N	N	N	nad	nad	0	0	0	0	0	0	0	0	BITTEN OR CRUSHED BY NONVENOMOUS SNAKE	Snake	Y	Foot/ankle	1	N	0	N	N	N	N
1205		26 Mar 2017	3	2017	26 Mar 2017	48	M	148	8.6	5.18	216	no comment	27	2.7	0.7	1.0	211	105		N	N	N	N	N	NA	N	N	N	nad	nad	0	0	0	0	0	0	0	0	BITTEN OR CRUSHED BY NONVENOMOUS SNAKE	Snake	Y	Foot/ankle	1	N	0	N	N	N	N
1206		02 Jun 2014	6	2014	02 Jun 2014	60	M	144	7.8	3.75	146	no comment	30	2.9		1.3	113	74		N	N	N	N	N	not done	N	N	N	nad	nad	0	0	0	0	0	0	0	0	BITTEN OR CRUSHED BY NONVENOMOUS SNAKE	Snake	Y	Foot/ankle	1	N	0	N	N	N	N
1207		26 Dec 2019	12	2019	26 Dec 2019	63	M	143	6.6	4.11	258	no comment	28	2.8		1.0	86	75		N	N	N	N	N	NA	N	N	N	nad	nad	0	0	0	0	0	0	0	0	BITTEN OR CRUSHED BY NONVENOMOUS SNAKE	Snake	Y	Foot/ankle	1	N	0	N	N	N	N
1208		23 Oct 2020	10	2020	24 Oct 2020	11	F	148	10.0	5.44	265	no comment	31	2.2	0.2	1.1	174	53		N	N	N	N	N	NA	N	N	N	nad	nad	0	0	0	0	0	0	0	0	CONTACT WITH BLACK SNAKE	Snake	Y	Foot/ankle	1	N	0	N	N	N	N
1209		13 Oct 2020	10	2020	14 Oct 2020	28	F	128	8.4	4.76	283	no comment	28	2.5	0.4	0.9	128	92		N	N	N	N	N	NA	N	N	N	nad	nad	0	0	0	0	0	0	0	0	CONTACT WITH BLACK SNAKE	Snake	Y	Foot/ankle	1	N	0	N	N	N	N
1210		19 Oct 2018	10	2018	20 Oct 2018	52	F	129	7.4	3.66	204	no comment	52	2.8	0.5	1.1	268	57		N	N	N	N	N	NA	N	Nausea	N	nad	nad	0	0	0	0	0	0	0	0	CONTACT WITH BLACK SNAKE	Snake	Y	Foot/ankle	1	N	0	N	N	N	N
1211		23 Mar 2017	3	2017	24 Mar 2017	66	F	144	7.7	4.53	221	no comment	27	3.6		1.1	56	67		N	N	N	N	N	NA	N	N	N	nad	nad	0	0	0	0	0	0	0	0	CONTACT WITH BLACK SNAKE	Snake	Y	Foot/ankle	1	N	0	N	N	N	N
1212		01 Jul 2018	7	2018	01 Jul 2018	71	F	144	5.3	2.99	245	no comment	35	4.2	0.5	1.0	127	63		N	N	N	N	N	NA	N	N	N	nad	nad	0	0	0	0	0	0	0	0	CONTACT WITH BLACK SNAKE	Snake	Y	Foot/ankle	1	N	0	N	N	N	N
1213		25 Dec 2014	12	2014	25 Dec 2014	7	M	123	4.8	2.68	244	no comment	36	2.7	0.4	1.1	134	37		N	N	N	N	N	not done	N	N	N	nad	nad	0	0	0	0	0	0	0	0	CONTACT WITH BLACK SNAKE	Snake	Y	Foot/ankle	1	N	0	N	N	N	N
1214		30 Oct 2016	10	2016	31 Oct 2016	17	M	143	9.6	6.96	258	no comment	28	2.9		1.1	264	67		N	N	N	N	N	not done	N	N	N	nad	nad	0	0	0	0	0	0	0	0	CONTACT WITH BLACK SNAKE	Snake	Y	Foot/ankle	1	N	0	N	N	N	N
1215		23 Aug 2014	8	2014	24 Aug 2014	23	M	144	7.7	3.74	215	no comment	33	2.5	0.3	1.0	275	88		N	N	N	N	N	not done	N	initial pain at bite site	N	nad	nad	0	0	0	0	0	0	0	0	CONTACT WITH BLACK SNAKE	Snake	Y	Foot/ankle	1	N	0	N	N	N	N
1216		10 Sep 2015	9	2015	10 Sep 2015	26	M	155	5.9	2.69	230	no comment	30	2.4	0.3	1.0	130	98		N	N	N	N	N	not done	N	N	N	nad	nad	0	0	0	0	0	0	0	0	CONTACT WITH BLACK SNAKE	Snake	Y	Foot/ankle	1	N	0	N	N	N	N
1217		12 Jan 2019	1	2019	12 Jan 2019	30	M	125	6.8	3.34	243	no comment	30	2.6	0.3	1.1	292	74		N	N	N	N	N	NA	N	N	N	nad	nad	0	0	0	0	0	0	0	0	CONTACT WITH BLACK SNAKE	Snake	Y	Foot/ankle	1	N	0	N	N	N	N
1218		27 Nov 2014	11	2014	27 Nov 2014	48	M	130	7.9	5.14	230	BFR no fragmented red cells	31	3.0	0.5	1.1	258	91		N	Y	N	N	N	not done	N	mildly dizzy, eyelids heavy	N	nad	nad	0	0	0	0	0	0	0	0	CONTACT WITH BLACK SNAKE	Snake	Y	Foot/ankle	1	N	0	N	N	N	N
1219		25 May 2016	5	2016	25 May 2016	48	M	157	9.4	6.03	192	no comment	23	3.3	0.8	1.0	130	97		N	N	N	N	N	not done	N	N	N	nad	nad	0	0	0	0	0	0	0	0	CONTACT WITH BLACK SNAKE	Snake	Y	Foot/ankle	1	N	0	N	N	N	N
1220		29 Oct 2015	10	2015	29 Oct 2015	13	F	127	5.8	1.45	268	BFR no fragmented red cells	35	2.3	0.2	1.1	88	51		N	N	N	N	N	not done	N	tight chest, headache	N	nad	nad	0	0	0	0	0	0	0	0	CONTACT WITH BROWN SNAKE	Snake	Y	Foot/ankle	1	N	0	N	N	N	N
1221		10 Mar 2020	3	2020	10 Mar 2020	44	F	121	7.4	4.03	207	no comment	27	2.1	1.4	1.0	56	62		N	N	N	N	N	NA	N	Palpitations	N	nad	nad	0	0	0	0	0	0	0	0	CONTACT WITH BROWN SNAKE	Snake	Y	Foot/ankle	1	N	0	N	N	N	N
1222		16 Aug 2019	8	2019	17 Aug 2019	48	F	84	6.2	3.73	283	BFR no fragmented red cells	27	2.3	7.3	1.1	78	58		N	N	N	N	N	NA	N	Pain	N	nad	nad	0	0	0	0	0	0	0	0	CONTACT WITH BROWN SNAKE	Snake	Y	Foot/ankle	1	N	0	N	N	N	N
1223		19 Sep 2017	9	2017	19 Sep 2017	15	M	141	7.9	4.49	155	no comment	26	2.6	0.3	1.1	118	64		N	N	N	N	N	NA	N	N	N	nad	nad	0	0	0	0	0	0	0	0	CONTACT WITH BROWN SNAKE	Snake	Y	Foot/ankle	1	N	0	N	N	N	N
1224		06 Jan 2017	1	2017	06 Jan 2017	38	M	150	6.7	3.71	126	no comment	33	3.3	0.5	1.1	139	81		N	N	N	N	N	not done	N	N	N	nad	nad	0	0	0	0	0	0	0	0	CONTACT WITH BROWN SNAKE	Snake	Y	Foot/ankle	1	N	0	N	N	N	N
1225		15 Jan 2017	1	2017	15 Jan 2017	68	M	116	3.1	1.61	202	no comment	29	4.4	0.9	1.1	70	73		N	N	N	N	N	NA	N	N	N	nad	nad	0	0	0	0	0	0	0	0	CONTACT WITH BROWN SNAKE	Snake	Y	Foot/ankle	1	N	0	N	N	N	N
1226		03 Apr 2016	4	2016	03 Apr 2016	70	M	160	8.4	5.68	238	no comment	28	4.0	11.1	1.1	110	86		N	N	N	N	N	not done	N	transient visual blurring	N	nad	nad	0	0	0	0	0	0	0	0	CONTACT WITH BROWN SNAKE	Snake	Y	Foot/ankle	1	N	0	N	N	N	N
1227		25 Nov 2017	11	2017	25 Nov 2017	77	M	142	7.6	5.1	270	no comment	28	2.5	0.4	1.0	279	65		N	N	N	N	N	NA	N	N	N	nad	nad	0	0	0	0	0	0	0	0	CONTACT WITH BROWN SNAKE	Snake	Y	Foot/ankle	1	N	0	N	N	N	N
1228		26 Dec 2014	12	2014	26 Dec 2014	63	M	122	5.8	2.88	199	no comment	34	2.7		1.0	60	61		N	N	N	N	Y	negative	N	dry mouth, tingling, mild blurring vision	N	nad	nad	0	0	0	0	0	0	0	0	CONTACT WITH UNSPECIFIED VENOMOUS SNAKE	Snake	Y	Foot/ankle	1	N	0	N	N	N	N
1382	Black	12 Feb 2020	2	2020	12 Feb 2020	27	F	140	19.2	17.76	276	no comment	42	2.1	1.3	1.2	143	58		N	N	N	N	Y	Black snake	N	Nausea / vomiting, abdominal pain, headache, diaphoresis, blurred vision	Y	N	GI symptoms	0	0	0	0	0	0	0	1	CONTACT WITH BLACK SNAKE	Snake	Y	Foot/ankle	1	N	0	Y - IHT Atherton	Y	Y	N
1402	Brown	12 Feb 2015	2	2015	12 Feb 2015	23	M	142	10.8	8.78	146	BFR no fragmented red cells	83	0.3	36.0	5.3	514	85		N	N	N	N	Y	Brown Snake	N	headache, dizzy,nausea	Y (2 vials brown AV)	N	coagulopathy VICC	1	0	0	0	0	0	0	0	CONTACT WITH BROWN SNAKE	Snake	Y	Foot/ankle	1	N	0	Y - IHT Cooktown	Y	Y	N
1352		08 Sep 2018	9	2018	08 Sep 2018	24	F	117	9.6	4.56	198	no comment	26	2.1	0.5	1.1	107	71		N	N	N	N	N	NA	N	N	N	nad	nad	0	0	0	0	0	0	0	0	BITTEN / CRUSHED SNAKE NOS	Snake	Y	Foot/ankle	1	Y	0	N	N	N	N
1353		17 Feb 2019	2	2019	17 Feb 2019	28	F	118	8.2	4.89	264	no comment	29	2.7	0.7	0.9	96	51		N	N	N	N	N	NA	N	N	N	nad	nad	0	0	0	0	0	0	0	0	BITTEN / CRUSHED SNAKE NOS	Snake	Y	Foot/ankle	1	Y	0	N	N	N	N
1354		06 Feb 2015	2	2015	06 Feb 2015	14	M	140	8.2	3.13	232	no comment	35	2.1	0.1	1.2	213	53		N	N	N	N	N	not done	N	N	N	nad	nad	0	0	0	0	0	0	0	0	BITTEN / CRUSHED SNAKE NOS	Snake	Y	Foot/ankle	1	Y	0	N	N	N	N
1355		16 Jun 2019	6	2019	17 Jun 2019	18	M	152	7.9	4.76	159	no comment	32	1.9	0.2	1.1	119	82		N	N	N	N	N	NA	N	Nausea	N	nad	nad	0	0	0	0	0	0	0	0	BITTEN / CRUSHED SNAKE NOS	Snake	Y	Foot/ankle	1	Y	0	N	N	N	N
1360		03 Jan 2019	1	2019	04 Jan 2019	51	M	144	6.7	3.65	206	no comment	27	2.3	0.2	0.9	122	87		N	N	N	N	N	NA	N	N	N	nad	nad	0	0	0	0	0	0	0	0	BITTEN / CRUSHED SNAKE NOS	Snake	Y	Foot/ankle	1	N	0	Y	Y	N	N
1363		05 Jul 2018	7	2018	05 Jul 2018	2	F	129	3.9	1.32	256	no comment					194	29		N	N	N	N	N	NA	N	N	N	nad	nad	0	0	0	0	0	0	0	0	BITTEN / CRUSHED SNAKE NOS	Snake	Y	Foot/ankle	1	N	0	Y - direct ref GP	Y	N	N
1364		16 May 2018	5	2018	17 May 2018	64	M	147	9.9	7.2	262	no comment	31	3.9	0.9	1.1	308	105		N	N	N	N	N	NA	N	N	N	nad	nad	0	0	0	0	0	0	0	0	BITTEN / CRUSHED SNAKE NOS	Snake	Y	Foot/ankle	1	N	0	Y - direct ref GP	Y	N	N
1368		10 Apr 2016	4	2016	11 Apr 2016	16	M	144	14.0	10.89	284	no comment	34	2.9		1.2		96		N	N	N	N	Y	negative	N	N	N	nad	nad	0	0	0	0	0	0	0	0	BITTEN / CRUSHED SNAKE NOS	Snake	Y	Foot/ankle	1	N	0	Y - GP	Y	N	N
1369		19 Apr 2014	4	2014	20 Apr 2014	16	M	150	8.6	4.98	210	no comment	30	1.8	0.3	1.1	436	85		N	N	N	N	N	not done	N	lightheaded, nausea, flank pain	N	nad	nad	0	0	0	0	0	0	0	0	BITTEN / CRUSHED SNAKE NOS	Snake	Y	Foot/ankle	1	N	0	Y - Careflight	Y	Y	N
1371		10 Jan 2014	1	2014	10 Jan 2014	28	F	122	10.3	8.61	282	no comment	32	4.1		1.2	140	68	21	N	N	N	N	N	not done	N	felt bite, 2 puncture marks, extreme pain, drowsy (post QAS morphine)	N	nad	nad	0	0	0	0	0	0	0	0	BITTEN / CRUSHED SNAKE NOS	Snake	Y	Foot/ankle	1	N	0	Y - Coen	Y	Y	N
1372		10 Jul 2020	7	2020	10 Jul 2020	28	M	156	7.7	4.67	287	no comment	28	2.1	0.4	1.1	335	119		N	N	N	N	N	NA	N	N	N	nad	nad	0	0	0	0	0	0	0	0	CONTACT WITH UNSPECIFIED VENOMOUS SNAKE	Snake	Y	Foot/ankle	1	N	0	Y - Coen	Y	Y	N
1373		10 Jun 2020	6	2020	10 Jun 2020	19	F	129	12.5	7.17	336	no comment	36	3.2	0.1	0.9	106	66		N	N	N	N	N	NA	N	N	N	nad	nad	0	0	0	0	0	0	0	0	BITTEN / CRUSHED SNAKE NOS	Snake	Y	Foot/ankle	1	N	0	Y - Georgetown	Y	Y	N
1374		29 Feb 2016	2	2016	29 Feb 2016	30	F	114	11.7	7.22	273	no comment	32	5.3	0.2	1.2	71	63		N	N	N	N	N	not done	N	palpitations	N	nad	nad	0	0	0	0	0	0	0	0	BITTEN / CRUSHED SNAKE NOS	Snake	Y	Foot/ankle	1	N	0	Y - IHT Arakun	Y	Y	N
1375		25 May 2018	5	2018	25 May 2018	22	M	118	10.4	6.69	218	no comment	31	3.6	0.5	1.1	202	70		N	N	N	N	N	NA	N	Headache	N	nad	nad	0	0	0	0	0	0	0	0	CONTACT WITH BROWN SNAKE	Snake	Y	Foot/ankle	1	N	0	Y - IHT Arakun	Y	Y	N
1376		08 Oct 2014	10	2014	08 Oct 2014	17	F	128	12.7	7.73	221	no comment	32	4.0	0.3	1.1	80	46		N	N	N	N	N	not done	N	N	N	nad	nad	0	0	0	0	0	0	0	0	BITTEN / CRUSHED SNAKE NOS	Snake	Y	Foot/ankle	1	N	0	Y - IHT Arukun	Y	Y	N
1380		23 Nov 2018	11	2018	23 Nov 2018	29	F	136	5.5	1.24	297	BFR no fragmented red cells	27	1.9	0.1	1.1	105	56		N	N	N	N	N	NA	N	N	N	nad	nad	0	0	0	0	0	0	0	0	BITTEN / CRUSHED SNAKE NOS	Snake	Y	Foot/ankle	1	N	0	Y - IHT Atherton	Y	Y	N
1381		23 Nov 2018	11	2018	23 Nov 2018	66	F	136	5.6	3.06	227	no comment	24	2.2	0.5	0.9	233	56		N	N	N	N	N	NA	N	N	N	nad	nad	0	0	0	0	0	0	0	0	BITTEN / CRUSHED SNAKE NOS	Snake	Y	Foot/ankle	1	N	0	Y - IHT Atherton	Y	Y	N
1679	Brown	20 Sep 2020	9	2020	22 Sep 2020	40	M	107	15.7	13.64	61	no comment	58	0.3	256.0	1.7	2610	341		N	N	N	N	Y (Mareeba)	Brown snake	Y	VF arrest on arrival, never extubated	Y - 2x polyvalent	N	VF arrest	0	0	0	0	0	1	0	0	CONTACT WITH BROWN SNAKE	Snake	Y	Foot/ankle	1	N	0	Y - IHT Mareeba	Y	Y	N
1383		03 Dec 2019	12	2019	03 Dec 2019	43	F	131	10.3	4.21	262	no comment	26	3.3	0.5	1.1	58	61		N	N	N	N	N	NA	N	Numb around bite site	N	nad	nad	0	0	0	0	0	0	0	0	BITTEN / CRUSHED SNAKE NOS	Snake	Y	Foot/ankle	1	N	0	Y - IHT Babinda	Y	Y	N
1384		07 Dec 2019	12	2019	07 Dec 2019	75	F	118	11.3	6.72	188	no comment	27	2.6	0.5	1.1	79	164		N	N	N	N	N	NA	N	N	N	nad	nad	0	0	0	0	0	0	0	0	BITTEN / CRUSHED SNAKE NOS	Snake	Y	Foot/ankle	1	N	0	Y - IHT Babinda	Y	Y	N
1385		04 Feb 2017	2	2017	04 Feb 2017	23	M	154	11.1	6.77	274	no comment	31	2.1	0.4	1.1	398	119		N	N	N	N	N	NA	N	N	N	nad	nad	0	0	0	0	0	0	0	0	BITTEN / CRUSHED SNAKE NOS	Snake	Y	Foot/ankle	1	N	0	Y - IHT Babinda	Y	Y	N
1386		05 Dec 2018	12	2018	05 Dec 2018	70	M	142	7.0	3.69	90	BFR no fragmented red cells	25	2.5	0.1	1.0	94	72	1	N	N	N	N	N	NA	N	N	N	nad	nad	0	0	0	0	0	0	0	0	BITTEN / CRUSHED SNAKE NOS	Snake	Y	Foot/ankle	1	N	0	Y - IHT Babinda	Y	Y	N
1392		12 Sep 2018	9	2018	13 Sep 2018	35	M	157	9.2	4.91	294	no comment	32	3.1	1.4	1.1	271	75		N	N	N	N	N	NA	N	N	N	nad	nad	0	0	0	0	0	0	0	0	BITTEN / CRUSHED SNAKE NOS	Snake	Y	Foot/ankle	1	N	0	Y - IHT Cohen	Y	Y	N
1393		08 Mar 2016	3	2016	08 Mar 2016	20	F	124	7.2	3.82	218	no comment	31	2.9		1.1	103	59		N	N	N	N	N	not done	N	N	N	nad	nad	0	0	0	0	0	0	0	0	BITTEN / CRUSHED SNAKE NOS	Snake	Y	Foot/ankle	1	N	0	Y - IHT Cooktown	Y	Y	N
1394		08 Jan 2015	1	2015	08 Jan 2015	36	F	159	7.8	5.17	246	no comment	24	3.5	0.3	1.1	142	61		N	N	N	N	N	not done	N	N	N	nad	nad	0	0	0	0	0	0	0	0	BITTEN / CRUSHED SNAKE NOS	Snake	Y	Foot/ankle	1	N	0	Y - IHT Cooktown	Y	Y	N
1395		07 Jan 2016	1	2016	17 Apr 2017	50	F	137	7.7	4.19	137	no comment	28	2.7	0.5	1.1	288	104		N	N	N	N	Y	negative	N	N	N	nad	nad	0	0	0	0	0	0	0	0	BITTEN / CRUSHED SNAKE NOS	Snake	Y	Foot/ankle	1	N	0	Y - IHT Cooktown	Y	Y	N
1396		27 Mar 2017	3	2017	27 Mar 2017	21	M	147	9.1	5.68	193	no comment	33	2.8	0.1	1.1	229	62		N	N	N	N	N	NA	N	Nausea	N	nad	nad	0	0	0	0	0	0	0	0	BITTEN / CRUSHED SNAKE NOS	Snake	Y	Foot/ankle	1	N	0	Y - IHT Cooktown	Y	Y	N
1397		22 Apr 2017	4	2017	23 Apr 2017	21	M	157	10.6	6.63	277	no comment	31	2.2	0.5	1.0	121	73		N	N	N	N	Y	negative	N	N	N	nad	nad	0	0	0	0	0	0	0	0	BITTEN / CRUSHED SNAKE NOS	Snake	Y	Foot/ankle	1	N	0	Y - IHT Cooktown	Y	Y	N
1398		05 Mar 2020	3	2020	05 Mar 2020	51	M	136	9.2	5.08	206	no comment	33	2.7	0.9	0.9	168	71		N	N	N	N	N	NA	N	N	N	nad	nad	0	0	0	0	0	0	0	0	BITTEN / CRUSHED SNAKE NOS	Snake	Y	Foot/ankle	1	N	0	Y - IHT Cooktown	Y	Y	N
1399		23 Jun 2015	6	2015	23 Jun 2015	65	M	145	6.5	3.72	183	no comment	24	3.3	1.0	1.1		76	2.200000048	N	N	N	N	N	not done	N	N	N	nad	nad	0	0	0	0	0	0	0	0	BITTEN / CRUSHED SNAKE NOS	Snake	Y	Foot/ankle	1	N	0	Y - IHT Cooktown	Y	Y	N
1400		22 Sep 2018	9	2018	23 Sep 2018	74	M	159	5.6	2.46	236	no comment	27	2.6	0.5	1.0	112	109		N	N	N	N	N	NA	N	N	N	nad	nad	0	0	0	0	0	0	0	0	BITTEN / CRUSHED SNAKE NOS	Snake	Y	Foot/ankle	1	N	0	Y - IHT Cooktown	Y	Y	N
1401		26 Dec 2018	12	2018	27 Dec 2018	8	F	120	7.3	3.62	253	no comment	36	3.6	1.2	1.1	160	33		N	N	N	N	N	NA	N	N	N	nad	nad	0	0	0	0	0	0	0	0	BITTEN OR CRUSHED BY NONVENOMOUS SNAKE	Snake	Y	Foot/ankle	1	N	0	Y - IHT Cooktown	Y	Y	N
1682	Brown	11 Aug 2015	8	2015	14 Aug 2015	55	M	129	11.8	9.16	109	BFR no fragmented red cells	200	0.3	36.0	11.0	241	132		N	N	N	N	Y	Brown snake (brown, dugite, gwardar)	N	Lower back pain radiating through to abdo, mild headache + blurring of vision, diaphoretic + hypotensive 80sys, given atropine w/ good effect	Y (1 vial brown snake AV AND 1 vial tigernake venom)	N (given prednisolone anyway)	Brown: coagulopathy and + VDK; Tigersnadke: tablelands numbers/prevalence	1	0	0	0	0	0	0	0	CONTACT WITH BROWN SNAKE	Snake	Y	Foot/ankle	1	N	0	Y - IHT Atherton	Y	Y	N
1403		04 Jul 2016	7	2016	04 Jul 2016	25	M	137	10.0	5.74	267	no comment	28	3.5	0.1	1.1	160	64		N	N	N	N	N	not done	N	N	N	nad	nad	0	0	0	0	0	0	0	0	CONTACT WITH DEATH ADDER	Snake	Y	Foot/ankle	1	N	0	Y - IHT Cooktown	Y	Y	N
1404		09 Jul 2014	7	2014	09 Jul 2014	51	M	131	6.1	4.34	31	BFR no fragmented red cells	32	1.7	0.7	1.4	362	72		N	N	N	N	Y	Brown snake (Cooktown, pt thought was death adder)	N	nausea, abdo pain, resolved	N	nad	nad	0	0	0	0	0	0	0	0	CONTACT WITH DEATH ADDER	Snake	Y	Foot/ankle	1	N	0	Y - IHT Cooktown	Y	Y	N
1415		27 Feb 2019	2	2019	27 Feb 2019	20	F	142	9.7	7.69	265	no comment	38	2.7	0.5	1.3	96	87		N	N	N	N	Y	Death Adder	N	Pain	N	nad	nad	0	0	0	0	0	0	0	0	CONTACT WITH DEATH ADDER	Snake	Y	Foot/ankle	1	N	1	Y - IHT Cooktown	Y	Y	N
1417		18 Nov 2018	11	2018	19 Nov 2018	28	F	119	9.9	7.61	227	no comment	42	1.6		1.1	426	61		N	N	N	N	Y	Death Adder	N	Bilateral ptosis	N	nad	nad	0	0	0	0	0	0	0	0	BITTEN / CRUSHED SNAKE NOS	Snake	Y	Foot/ankle	1	N	0	Y - IHT Cooktown	Y	Y	N
1420		25 Jan 2019	1	2019	25 Jan 2019	16	M	158	7.3	3.72	196	no comment	33	1.7	0.4	1.1	288	80		N	N	N	N	N	NA	N	N	N	nad	nad	0	0	0	0	0	0	0	0	BITTEN / CRUSHED SNAKE NOS	Snake	Y	Foot/ankle	1	N	0	Y - IHT Innisfail	Y	Y	N
1421		06 Jun 2014	6	2014	06 Jun 2014	12	M	130	3.9	1.86	202	BFR no fragmented red cells	30	2.7	0.3	1.3	198	58		N	N	N	N	N	not done	N	tingling, 2 puncture marks	N	nad	nad	0	0	0	0	0	0	0	0	BITTEN OR CRUSHED BY NONVENOMOUS SNAKE	Snake	Y	Foot/ankle	1	N	0	Y - IHT Innisfail	Y	Y	N
974	Taipan	21 Jan 2015	1	2015	22 Jan 2015	16	M	154	17.9	15.55	201	BFR no fragmented red cells	25	3.2	4.8	1.2	1880	117		N	N	N	N	Y	Taipan (Taipan, Small scaled, Fierce)	N	anxious, diplopia	Y (1 vial taipan AV)	N	coagulopathy +/- neurotoxicity signs	1	0	0	0	0	0	1	0	CONTACT WITH TAIPAN	Snake	Y	Foot/ankle	1	N	0	N	N	N	N
1423		19 May 2014	5	2014	19 May 2014	46	F	122	8.6	6.11	263	BFR no fragmented red cells	23	4.2	0.4	1.1	72	78		N	N	N	N	N	not done	N	N	N	nad	nad	0	0	0	0	0	0	0	0	BITTEN / CRUSHED SNAKE NOS	Snake	Y	Foot/ankle	1	N	0	Y - IHT Kowanyama	Y	Y	N
1424		27 Jul 2015	7	2015	27 Jul 2015	6	F	119	10.5	8.39	239	BFR no fragmented red cells	27	3.5	0.4	1.2	96	35		N	N	N	N	N	not done	N	N	N	nad	nad	0	0	0	0	0	0	0	0	BITTEN OR CRUSHED BY NONVENOMOUS SNAKE	Snake	Y	Foot/ankle	1	N	0	Y - IHT Kowanyama	Y	Y	N
1425		16 Apr 2020	4	2020	16 Apr 2020	40	F	128	9.9	7.02	239	no comment	28	4.3	0.5	1.1	76	57		N	N	N	N	N	NA	N	Headache, abdominal pain	N	nad	nad	0	0	0	0	0	0	0	0	CONTACT WITH UNSPECIFIED VENOMOUS SNAKE	Snake	Y	Foot/ankle	1	N	0	Y - IHT Kowanyama	Y	Y	N
1427		01 Apr 2018	4	2018	01 Apr 2018	16	M	128	10.9	5.33	164	no comment	29	1.8	0.3	1.1	347	75		N	N	N	N	N	NA	N	N	N	nad	nad	0	0	0	0	0	0	0	0	BITTEN / CRUSHED SNAKE NOS	Snake	Y	Foot/ankle	1	N	0	Y - IHT Lockhart	Y	Y	N
1428		02 Oct 2017	10	2017	03 Oct 2017	21	M	150	8.9	4.55	294	no comment	32	3.1	0.5	1.2	241	100		N	N	N	N	N	NA	N	N	N	nad	nad	0	0	0	0	0	0	0	0	BITTEN / CRUSHED SNAKE NOS	Snake	Y	Foot/ankle	1	N	0	Y - IHT Lockhart	Y	Y	N
1432		08 Feb 2015	2	2015	08 Feb 2015	13	F	127	13.9	9.07	292	no comment	30	2.8	0.3	1.1	86	58		N	N	N	N	N	not done	N	dizzy	N	nad	nad	0	0	0	0	0	0	0	0	BITTEN / CRUSHED SNAKE NOS	Snake	Y	Foot/ankle	1	N	0	Y - IHT Mareeba	Y	Y	N
1433		15 Nov 2019	11	2019	15 Nov 2019	52	F	133	8.5	4.57	254	no comment	30	4.1	0.5	1.0	104	55		N	N	N	N	N	NA	N	N	N	nad	nad	0	0	0	0	0	0	0	0	BITTEN / CRUSHED SNAKE NOS	Snake	Y	Foot/ankle	1	N	0	Y - IHT Mareeba	Y	Y	N
1434		31 Dec 2016	12	2016	31 Dec 2016	53	F	132	10.1	7.33	312	no comment	31	2.5	0.1	1.0	101	72		N	N	N	N	N	not done	N	N	N	nad	nad	0	0	0	0	0	0	0	0	BITTEN / CRUSHED SNAKE NOS	Snake	Y	Foot/ankle	1	N	0	Y - IHT Mareeba	Y	Y	N
1435		02 Dec 2016	12	2016	03 Dec 2016	64	F	123	6.6	4.09	201	no comment	33	3.7	0.6	1.1	113	61		N	N	N	N	N	not done	N	N	N	nad	nad	0	0	0	0	0	0	0	0	BITTEN / CRUSHED SNAKE NOS	Snake	Y	Foot/ankle	1	N	0	Y - IHT Mareeba	Y	Y	N
1436		11 Jan 2020	1	2020	11 Jan 2020	11	M	129	8.0	5.82	336	BFR no fragmented red cells	40	1.6	0.3	1.1	211	44		N	N	N	N	Y	negative	N	Nausea	N	nad	nad	0	0	0	0	0	0	0	0	BITTEN / CRUSHED SNAKE NOS	Snake	Y	Foot/ankle	1	N	0	Y - IHT Mareeba	Y	Y	N
1437		20 Feb 2015	2	2015	20 Feb 2015	33	M	143	8.5	3.15	159	no comment	31	2.0	0.1	1.1	276	82		N	N	N	N	N	not done	N	N	N	nad	nad	0	0	0	0	0	0	0	0	BITTEN / CRUSHED SNAKE NOS	Snake	Y	Foot/ankle	1	N	0	Y - IHT Mareeba	Y	Y	N
1438		06 Feb 2014	2	2014	06 Feb 2014	42	M	124	6.7	3.47	221	no comment	31	2.7	0.1	1.1	294	76		N	N	N	N	N	not done	N	mild bite site pain	N	nad	nad	0	0	0	0	0	0	0	0	BITTEN / CRUSHED SNAKE NOS	Snake	Y	Foot/ankle	1	N	0	Y - IHT Mareeba	Y	Y	N
1439		25 May 2014	5	2014	26 May 2014	43	M	152	5.2	3.47	193	no comment	26	3.5	0.6	1.1	76	61	1	N	N	N	N	N	not done	N	mild pain, mild HA	N	nad	nad	0	0	0	0	0	0	0	0	BITTEN / CRUSHED SNAKE NOS	Snake	Y	Foot/ankle	1	N	0	Y - IHT Mareeba	Y	Y	N
1440		01 Nov 2019	11	2019	01 Nov 2019	56	M	161	10.1	7.24	194	no comment	26	3.4	1.2	1.1	90	86		N	N	N	N	Y	negative	N	Chest pain, diplopia	N	nad	nad	0	0	0	0	0	0	0	0	BITTEN / CRUSHED SNAKE NOS	Snake	Y	Foot/ankle	1	N	0	Y - IHT Mareeba	Y	Y	N
1441		22 Dec 2013	12	2013	22 Dec 2013	59	M	161	4.7	2.9	168	no comment	35	2.7		1.2	144	71	1	N	N	N	N	Y	Brown snake- weakly positive for (Mareeba)	N	felt sting left foot, saw puncture marks	N	nad	nad	0	0	0	0	0	0	0	0	BITTEN / CRUSHED SNAKE NOS	Snake	Y	Foot/ankle	1	N	0	Y - IHT Mareeba	Y	Y	N
1442		08 Apr 2020	4	2020	09 Apr 2020	62	M	139	7.7	4.11	257	no comment	28	2.3	1.2	1.0	112	88		N	N	N	N	N	NA	N	Pain	N	nad	nad	0	0	0	0	0	0	0	0	BITTEN / CRUSHED SNAKE NOS	Snake	Y	Foot/ankle	1	N	0	Y - IHT Mareeba	Y	Y	N
1443		23 Jul 2016	7	2016	24 Jul 2016	63	M	140	10.7	7.16	240	no comment	37	3.7	0.3	1.1	204	76		N	N	N	N	N	not done	N	N	N	nad	nad	0	0	0	0	0	0	0	0	BITTEN / CRUSHED SNAKE NOS	Snake	Y	Foot/ankle	1	N	0	Y - IHT Mareeba	Y	Y	N
1444		03 Jan 2019	1	2019	03 Jan 2019	74	M	144	6.6	4.45	147	BFR no fragmented red cells	26	2.7	0.6	1.0	118	52		N	N	N	N	N	NA	N	N	N	nad	nad	0	0	0	0	0	0	0	0	BITTEN / CRUSHED SNAKE NOS	Snake	Y	Foot/ankle	1	N	0	Y - IHT Mareeba	Y	Y	N
1445		06 Apr 2020	4	2020	06 Apr 2020	76	M	148	8.1	5.06	132	BFR no fragmented red cells	36	3.5	1.1	1.1	216	123		N	N	N	N	N	NA	N	N	N	nad	nad	0	0	0	0	0	0	0	0	BITTEN / CRUSHED SNAKE NOS	Snake	Y	Foot/ankle	1	N	0	Y - IHT Mareeba	Y	Y	N
1446		11 Mar 2019	3	2019	11 Mar 2019	58	F	129	7.5	3.88	249	no comment	27	2.5	0.5	1.0	101	84		N	N	N	N	N	NA	N	Nausea, headache	N	nad	nad	0	0	0	0	0	0	0	0	BITTEN OR CRUSHED BY NONVENOMOUS SNAKE	Snake	Y	Foot/ankle	1	N	0	Y - IHT Mareeba	Y	Y	N
1447		20 May 2016	5	2016	20 May 2016	75	F	132	6.9	3.62	199	no comment	27	4.9		1.0	84	75		N	N	N	N	N	not done	N	N	N	nad	nad	0	0	0	0	0	0	0	0	BITTEN OR CRUSHED BY NONVENOMOUS SNAKE	Snake	Y	Foot/ankle	1	N	0	Y - IHT Mareeba	Y	Y	N
1448		01 Jan 2015	1	2015	01 Jan 2015	29	M	147	9.0	4.11	186	no comment	26	2.0	0.3	1.0	338	114		N	N	N	N	Y	negative	N	N	N	nad	nad	0	0	0	0	0	0	0	0	BITTEN OR CRUSHED BY NONVENOMOUS SNAKE	Snake	Y	Foot/ankle	1	N	0	Y - IHT Mareeba	Y	Y	N
1449		06 Apr 2015	4	2015	06 Apr 2015	30	M	152	11.1	7.42	260	no comment	27	1.9	0.1	1.0	66	64		N	N	N	N	N	not done	N	N	N	nad	nad	0	0	0	0	0	0	0	0	BITTEN OR CRUSHED BY NONVENOMOUS SNAKE	Snake	Y	Foot/ankle	1	N	0	Y - IHT Mareeba	Y	Y	N
1450		14 Oct 2019	10	2019	15 Oct 2019	55	M	144	8.5	5.26	228	no comment	28	2.5		1.2	286	107		N	N	N	N	N	NA	N	N	N	nad	nad	0	0	0	0	0	0	0	0	BITTEN OR CRUSHED BY NONVENOMOUS SNAKE	Snake	Y	Foot/ankle	1	N	0	Y - IHT Mareeba	Y	Y	N
1451		08 Apr 2015	4	2015	08 Apr 2015	69	F	135	9.5	5.38	287	no comment	34	4.0	0.1	1.2	69	59	1	N	N	N	N	Y	negative	N	N	N	nad	nad	0	0	0	0	0	0	0	0	CONTACT WITH BLACK SNAKE	Snake	Y	Foot/ankle	1	N	0	Y - IHT Mareeba	Y	Y	N
1452		21 Apr 2015	4	2015	21 Apr 2015	16	M	144	8.3	3.79	258	no comment	31	3.1	0.2	1.0	256	62		N	N	N	N	N	not done	N	transient abdo pain and ?blurred vision	N	nad	nad	0	0	0	0	0	0	0	0	CONTACT WITH BLACK SNAKE	Snake	Y	Foot/ankle	1	N	0	Y - IHT Mareeba	Y	Y	N
1453		19 Jan 2015	1	2015	19 Jan 2015	32	F	134	4.6	2.05	192	no comment	39	2.6	0.7	1.0	321	60		N	N	N	N	N	not done	N	headache	N	nad	nad	0	0	0	0	0	0	0	0	CONTACT WITH BROWN SNAKE	Snake	Y	Foot/ankle	1	N	0	Y - IHT Mareeba	Y	Y	N
1454		05 Apr 2015	4	2015	05 Apr 2015	35	F	108	5.8	3.02	169	no comment	28	2.0	3.3	1.0	200	79		N	N	N	N	N	not done	N	N	N	nad	nad	0	0	0	0	0	0	0	0	CONTACT WITH BROWN SNAKE	Snake	Y	Foot/ankle	1	N	0	Y - IHT Mareeba	Y	Y	N
1479		04 May 2017	5	2017	05 May 2017	2	F	123	9.7	3.02	298	no comment	32	2.8	0.3	1.1	187	29		N	N	N	N	N	NA	N	N	N	nad	nad	0	0	0	0	0	0	0	0	BITTEN / CRUSHED SNAKE NOS	Snake	Y	Foot/ankle	1	N	0	Y - IHT Mareeba	Y	Y	N
1480		29 Apr 2017	4	2017	29 Apr 2017	22	F	140	10.1	4.83	185	no comment	30	2.2	2.1	1.1	88	62		N	N	N	N	N	NA	N	N	N	nad	nad	0	0	0	0	0	0	0	0	BITTEN / CRUSHED SNAKE NOS	Snake	Y	Foot/ankle	1	N	0	Y - IHT Mareeba	Y	Y	N
1481		17 Jan 2016	1	2016	17 Jan 2016	33	F	147	4.8	4.8	268	no comment	28	2.5	0.2	1.0	82	67		N	N	N	N	N	not done	N	mild headache	N	nad	nad	0	0	0	0	0	0	0	0	BITTEN / CRUSHED SNAKE NOS	Snake	Y	Foot/ankle	1	N	0	Y - IHT Mareeba	Y	Y	N
1482		29 Nov 2018	11	2018	29 Nov 2018	42	F	126	9.1	5.96	167	no comment	30	3.0	0.4	1.1	87	65		N	N	N	N	N	NA	N	N	N	nad	nad	0	0	0	0	0	0	0	0	BITTEN / CRUSHED SNAKE NOS	Snake	Y	Foot/ankle	1	N	0	Y - IHT Mareeba	Y	Y	N
1483		02 Apr 2017	4	2017	02 Apr 2017	7	M	120	10.3	3.79	246	no comment	33	1.8	0.3	1.1	257	46		N	N	N	N	N	NA	N	N	N	nad	nad	0	0	0	0	0	0	0	0	BITTEN / CRUSHED SNAKE NOS	Snake	Y	Foot/ankle	1	N	0	Y - IHT Mareeba	Y	Y	N
1484		21 Jan 2018	1	2018	22 Jan 2018	13	M	144	7.9	5.17	277	no comment	33	2.5	2.9	1.0	240	57		N	N	N	N	N	NA	N	N	N	nad	nad	0	0	0	0	0	0	0	0	BITTEN / CRUSHED SNAKE NOS	Snake	Y	Foot/ankle	1	N	0	Y - IHT Mareeba	Y	Y	N
1485		12 Sep 2017	9	2017	13 Sep 2017	24	M	126	8.0	5.28	173	no comment	37	2.4	1.4	1.2	82	61		N	N	N	N	N	NA	N	N	N	nad	nad	0	0	0	0	0	0	0	0	BITTEN / CRUSHED SNAKE NOS	Snake	Y	Foot/ankle	1	N	0	Y - IHT Mareeba	Y	Y	N
1486		07 Oct 2015	10	2015	08 Oct 2015	25	M	147	9.9	7.01	186	no comment	25	3.1	0.2	1.0	215	70		N	N	N	N	N	not done	N	mild abdo pain during transport, otherwise N	N	nad	nad	0	0	0	0	0	0	0	0	BITTEN / CRUSHED SNAKE NOS	Snake	Y	Foot/ankle	1	N	0	Y - IHT Mareeba	Y	Y	N
1487		08 Mar 2018	3	2018	08 Mar 2018	27	M	152	9.5	6.84	229	no comment	29	2.5	0.3	1.1	171	101		N	N	N	N	N	NA	N	N	N	nad	nad	0	0	0	0	0	0	0	0	BITTEN / CRUSHED SNAKE NOS	Snake	Y	Foot/ankle	1	N	0	Y - IHT Mareeba	Y	Y	N
1488		21 Oct 2018	10	2018	22 Oct 2018	29	M	145	5.7	3.75	242	no comment	27	2.5	1.0	1.1	88	78		N	N	N	N	N	NA	N	N	N	nad	nad	0	0	0	0	0	0	0	0	BITTEN / CRUSHED SNAKE NOS	Snake	Y	Foot/ankle	1	N	0	Y - IHT Mareeba	Y	Y	N
1489		09 Mar 2017	3	2017	09 Mar 2017	30	M	173	8.6	5.67	218	no comment	27	2.9	0.3	1.1	303	140		N	N	N	N	N	NA	N	N	N	nad	nad	0	0	0	0	0	0	0	0	BITTEN / CRUSHED SNAKE NOS	Snake	Y	Foot/ankle	1	N	0	Y - IHT Mareeba	Y	Y	N
1490		05 Mar 2017	3	2017	05 Mar 2017	31	M	158	6.4	4.23	193	no comment	40	2.6	0.1	1.1	108	74		N	N	N	N	N	NA	N	N	N	nad	nad	0	0	0	0	0	0	0	0	BITTEN / CRUSHED SNAKE NOS	Snake	Y	Foot/ankle	1	N	0	Y - IHT Mareeba	Y	Y	N
1491		20 Sep 2017	9	2017	21 Sep 2017	32	M	152	10.7	7.08	311	no comment	26	2.7	0.3	1.0	172	92		N	N	N	N	N	NA	N	N	N	nad	nad	0	0	0	0	0	0	0	0	BITTEN / CRUSHED SNAKE NOS	Snake	Y	Foot/ankle	1	N	0	Y - IHT Mareeba	Y	Y	N
1492		18 Feb 2018	2	2018	18 Feb 2018	33	M	157	6.9	4.57	206	no comment	29	1.5	0.3	1.0	128	84		N	N	N	N	N	NA	N	N	N	nad	nad	0	0	0	0	0	0	0	0	BITTEN / CRUSHED SNAKE NOS	Snake	Y	Foot/ankle	1	N	0	Y - IHT Mareeba	Y	Y	N
1493		21 Oct 2018	10	2018	21 Oct 2018	40	M	134	7.1	4.26	198	BFR no fragmented red cells	42	2.7		1.2	88	92		N	N	N	N	N	NA	N	N	N	nad	nad	0	0	0	0	0	0	0	0	BITTEN / CRUSHED SNAKE NOS	Snake	Y	Foot/ankle	1	N	0	Y - IHT Mareeba	Y	Y	N
1494		13 Nov 2015	11	2015	13 Nov 2015	60	M	135	6.9	4.2	201	no comment	26	3.3	0.4	1.1	222	74		N	N	N	N	N	not done	N	N	N	nad	nad	0	0	0	0	0	0	0	0	BITTEN / CRUSHED SNAKE NOS	Snake	Y	Foot/ankle	1	N	0	Y - IHT Mareeba	Y	Y	N
1495		05 Mar 2017	3	2017	05 Mar 2017	14	F	143	9.5	4.63	231	no comment	39	2.7	0.1	1.1	127	53		N	N	N	N	N	NA	N	N	N	nad	nad	0	0	0	0	0	0	0	0	BITTEN OR CRUSHED BY NONVENOMOUS SNAKE	Snake	Y	Foot/ankle	1	N	0	Y - IHT Mareeba	Y	Y	N
1496		17 Sep 2018	9	2018	17 Sep 2018	60	F	131	10.0	5.73	212	no comment	29	2.8	0.8	1.1	133	59		N	N	N	N	N	NA	N	N	N	nad	nad	0	0	0	0	0	0	0	0	CONTACT WITH BROWN SNAKE	Snake	Y	Foot/ankle	1	N	0	Y - IHT Mareeba	Y	Y	N
1518		23 Sep 2018	9	2018	23 Sep 2018	6	F	127	10.7	6.07	339	BFR no fragmented red cells	30	2.1	0.4	1.9	184	35		N	N	N	N	N	NA	N	N	N	nad	nad	0	0	0	0	0	0	0	0	BITTEN / CRUSHED SNAKE NOS	Snake	N	Foot/ankle	1	N	0	Y - IHT Mossman	Y	Y	N
1519		29 Nov 2016	11	2016	29 Nov 2016	6	F	125	6.6	3.54	256	no comment	30	2.9	0.2	1.2	55	32		N	N	N	N	N	not done	N	N	N	nad	nad	0	0	0	0	0	0	0	0	BITTEN / CRUSHED SNAKE NOS	Snake	Y	Foot/ankle	1	N	0	Y - IHT Mossman	Y	Y	N
1520		02 Jan 2020	1	2020	02 Jan 2020	12	F	131	7.3	2.93	237	no comment	32	1.9	0.4	1.0	122	45		N	N	N	N	N	NA	N	N	N	nad	nad	0	0	0	0	0	0	0	0	BITTEN / CRUSHED SNAKE NOS	Snake	Y	Foot/ankle	1	N	0	Y - IHT Mossman	Y	Y	N
1521		02 Mar 2020	3	2020	03 Mar 2020	15	F	116	7.4	3.51	290	no comment	41	1.7	0.2	1.1	99	60		N	N	N	N	N	NA	N	Headache, chest pain	N	nad	nad	0	0	0	0	0	0	0	0	BITTEN / CRUSHED SNAKE NOS	Snake	Y	Foot/ankle	1	N	0	Y - IHT Mossman	Y	Y	N
1522		06 Feb 2017	2	2017	06 Feb 2017	16	F	130	11.5	7.14	247	no comment	39	3.9	0.3	1.2	110	77		N	N	N	N	N	NA	N	N	N	nad	nad	0	0	0	0	0	0	0	0	BITTEN / CRUSHED SNAKE NOS	Snake	Y	Foot/ankle	1	N	0	Y - IHT Mossman	Y	Y	N
1523		24 Jul 2016	7	2016	24 Jul 2016	17	F	128	8.2	4.67	251	no comment	31	2.8	0.1	1.1	228	64		N	N	N	N	N	not done	N	N	N	nad	nad	0	0	0	0	0	0	0	0	BITTEN / CRUSHED SNAKE NOS	Snake	Y	Foot/ankle	1	N	0	Y - IHT Mossman	Y	Y	N
1524		31 Jan 2016	1	2016	31 Jan 2016	30	F	138	6.0	3.31	234	no comment	31	3.5	0.8	1.1	39	56		N	N	N	N	N	not done	N	N	N	nad	nad	0	0	0	0	0	0	0	0	BITTEN / CRUSHED SNAKE NOS	Snake	Y	Foot/ankle	1	N	0	Y - IHT Mossman	Y	Y	N
1525		18 Oct 2017	10	2017	18 Oct 2017	30	F	120	7.8	5.11	291	BFR no fragmented red cells	27	2.0		1.0	97	78		N	N	N	N	N	NA	N	N	N	nad	nad	0	0	0	0	0	0	0	0	BITTEN / CRUSHED SNAKE NOS	Snake	Y	Foot/ankle	1	N	0	Y - IHT Mossman	Y	Y	N
1526		03 Mar 2018	3	2018	04 Mar 2018	31	F	131	7.2	4.22	214	no comment	32	1.9	0.4	1.0	70	57		N	N	N	N	N	NA	N	N	N	nad	nad	0	0	0	0	0	0	0	0	BITTEN / CRUSHED SNAKE NOS	Snake	Y	Foot/ankle	1	N	0	Y - IHT Mossman	Y	Y	N
1527		13 Mar 2019	3	2019	13 Mar 2019	32	F	130	8.4	5.2	235	no comment	32	2.2	0.3	1.1	126	61		N	N	N	N	N	NA	N	N	N	nad	nad	0	0	0	0	0	0	0	0	BITTEN / CRUSHED SNAKE NOS	Snake	Y	Foot/ankle	1	N	0	Y - IHT Mossman	Y	Y	N
1528		30 Sep 2018	9	2018	30 Sep 2018	41	F	129	5.3	2.6	245	no comment	28	2.7	0.4	1.1	59	69		N	N	N	N	N	NA	N	Nausea	N	nad	nad	0	0	0	0	0	0	0	0	BITTEN / CRUSHED SNAKE NOS	Snake	Y	Foot/ankle	1	N	0	Y - IHT Mossman	Y	Y	N
1529		09 Jan 2016	1	2016	09 Jan 2016	45	F	140	5.3	2.59	203	no comment	25	2.2	0.3	1.1	217	79		N	N	N	N	N	not done	N	N	N	nad	nad	0	0	0	0	0	0	0	0	BITTEN / CRUSHED SNAKE NOS	Snake	Y	Foot/ankle	1	N	0	Y - IHT Mossman	Y	Y	N
1530		13 Jul 2020	7	2020	13 Jul 2020	45	F	121	8.1	5.22	282	no comment	29	1.9	0.2	1.0	115	41		N	N	N	N	N	NA	N	N	N	nad	nad	0	0	0	0	0	0	0	0	BITTEN / CRUSHED SNAKE NOS	Snake	Y	Foot/ankle	1	N	0	Y - IHT Mossman	Y	Y	N
1531		02 Aug 2018	8	2018	02 Aug 2018	52	F	129	6.7	4.25	287	BFR no fragmented red cells	26	3.1	4.9	0.9	97	67		N	N	N	N	N	NA	N	N	N	nad	nad	0	0	0	0	0	0	0	0	BITTEN / CRUSHED SNAKE NOS	Snake	Y	Foot/ankle	1	N	0	Y - IHT Mossman	Y	Y	N
1532		03 Mar 2017	3	2017	03 Mar 2017	53	F	128	8.3	4.38	249	no comment	25	3.4	1.4	1.0	166	56		N	N	N	N	N	NA	N	Nausea	N	nad	nad	0	0	0	0	0	0	0	0	BITTEN / CRUSHED SNAKE NOS	Snake	Y	Foot/ankle	1	N	0	Y - IHT Mossman	Y	Y	N
1533		24 Jul 2015	7	2015	24 Jul 2015	54	F	114	4.6	2.7	262	no comment	37	2.7		1.0	109	67		N	N	N	N	N	not done	N	N	N	nad	nad	0	0	0	0	0	0	0	0	BITTEN / CRUSHED SNAKE NOS	Snake	Y	Foot/ankle	1	N	0	Y - IHT Mossman	Y	Y	N
1534		27 Dec 2018	12	2018	27 Dec 2018	55	F	135	7.9	3.39	240	BFR no fragmented red cells	30	2.8	0.3	0.9	131	59		N	N	N	N	N	NA	N	N	N	nad	nad	0	0	0	0	0	0	0	0	BITTEN / CRUSHED SNAKE NOS	Snake	Y	Foot/ankle	1	N	0	Y - IHT Mossman	Y	Y	N
1535		29 Nov 2017	11	2017	29 Nov 2017	57	F	133	8.2	3.33	209	no comment	36	2.2	0.3	1.1	101	67		N	N	N	N	N	NA	N	N	N	nad	nad	0	0	0	0	0	0	0	0	BITTEN / CRUSHED SNAKE NOS	Snake	Y	Foot/ankle	1	N	0	Y - IHT Mossman	Y	Y	N
1536		01 Apr 2014	4	2014	02 Apr 2014	65	F	122	4.7	2.41	169	no comment	28	2.8	0.8	1.1	79	67		N	N	N	N	N	not done	N	N	N	nad	nad	0	0	0	0	0	0	0	0	BITTEN / CRUSHED SNAKE NOS	Snake	Y	Foot/ankle	1	N	0	Y - IHT Mossman	Y	Y	N
1537		04 Jun 2019	6	2019	04 Jun 2019	81	F	130	4.8	2.86	182	no comment	28	3.8	0.9	1.0	163	85		N	N	N	N	N	NA	N	N	N	nad	nad	0	0	0	0	0	0	0	0	BITTEN / CRUSHED SNAKE NOS	Snake	Y	Foot/ankle	1	N	0	Y - IHT Mossman	Y	Y	N
1538		30 Mar 2015	3	2015	30 Mar 2015	7	M	130	7.7	4.47	286	no comment	29	2.3	0.1	1.1	183	42		N	N	N	N	N	not done	N	N	N	nad	nad	0	0	0	0	0	0	0	0	BITTEN / CRUSHED SNAKE NOS	Snake	Y	Foot/ankle	1	N	0	Y - IHT Mossman	Y	Y	N
1539		04 Nov 2014	11	2014	04 Nov 2014	9	M	122	6.3	3.42	205	no comment	84	2.1	0.5	1.9	134	40		N	N	N	N	N	not done	N	abdo pain, nauseous	N	nad	nad	0	0	0	0	0	0	0	0	BITTEN / CRUSHED SNAKE NOS	Snake	Y	Foot/ankle	1	N	0	Y - IHT Mossman	Y	Y	N
1540		28 Jan 2018	1	2018	28 Jan 2018	17	M	146	6.7	3.42	173	no comment	28	2.3		1.0	234	90		N	N	N	N	N	NA	N	N	N	nad	nad	0	0	0	0	0	0	0	0	BITTEN / CRUSHED SNAKE NOS	Snake	Y	Foot/ankle	1	N	0	Y - IHT Mossman	Y	Y	N
1541		04 Jan 2018	1	2018	04 Jan 2018	24	M	162	7.9	5.14	188	no comment	32	2.5	0.4	1.0	260	73		N	N	N	N	N	NA	N	N	N	nad	nad	0	0	0	0	0	0	0	0	BITTEN / CRUSHED SNAKE NOS	Snake	Y	Foot/ankle	1	N	0	Y - IHT Mossman	Y	Y	N
1542		23 Jan 2017	1	2017	23 Jan 2017	25	M	161	7.4	3.32	271	no comment	25	2.1	0.4	1.1	134	83		N	N	N	N	N	NA	N	N	N	nad	nad	0	0	0	0	0	0	0	0	BITTEN / CRUSHED SNAKE NOS	Snake	Y	Foot/ankle	1	N	0	Y - IHT Mossman	Y	Y	N
1543		06 Oct 2017	10	2017	06 Oct 2017	26	M	126	4.9	2.59	154	no comment	30	3.2	0.5	1.1	218	82		N	N	N	N	N	NA	N	N	N	nad	nad	0	0	0	0	0	0	0	0	BITTEN / CRUSHED SNAKE NOS	Snake	Y	Foot/ankle	1	N	0	Y - IHT Mossman	Y	Y	N
1544		31 Jan 2014	1	2014	31 Jan 2014	30	M	151	8.4	4.73	243	no comment	35	2.6	0.1	1.2	89	63		N	N	N	N	N	not done	N	saw bite, nil else	N	nad	nad	0	0	0	0	0	0	0	0	BITTEN / CRUSHED SNAKE NOS	Snake	Y	Foot/ankle	1	N	0	Y - IHT Mossman	Y	Y	N
1545		22 Jul 2019	7	2019	22 Jul 2019	30	M	147	8.5	4.04	202	no comment	29	2.0	0.1	1.1	632	60		N	N	N	N	N	NA	N	Abdominal pain	N	nad	nad	0	0	0	0	0	0	0	0	BITTEN / CRUSHED SNAKE NOS	Snake	Y	Foot/ankle	1	N	0	Y - IHT Mossman	Y	Y	N
1546		24 Dec 2018	12	2018	24 Dec 2018	32	M	135	7.5	4.16	202	no comment	31	2.0	0.4	1.2	2120	80		N	N	N	N	N	NA	N	N	N	nad	nad	0	0	0	0	0	0	0	0	BITTEN / CRUSHED SNAKE NOS	Snake	Y	Foot/ankle	1	N	0	Y - IHT Mossman	Y	Y	N
1547		24 Nov 2017	11	2017	24 Nov 2017	34	M	145	12.2	6.64	338	no comment	30	3.6	0.4	1.0	52	76		N	N	N	N	N	NA	N	N	N	nad	nad	0	0	0	0	0	0	0	0	BITTEN / CRUSHED SNAKE NOS	Snake	Y	Foot/ankle	1	N	0	Y - IHT Mossman	Y	Y	N
1548		01 May 2019	5	2019	01 May 2019	37	M	149	7.3	3.33	215	no comment	31	2.2	0.4	1.0	306	97		N	N	N	N	N	NA	N	N	N	nad	nad	0	0	0	0	0	0	0	0	BITTEN / CRUSHED SNAKE NOS	Snake	Y	Foot/ankle	1	N	0	Y - IHT Mossman	Y	Y	N
1549		13 Dec 2014	12	2014	13 Dec 2014	39	M	143	8.4	4.64	188	no comment	29	2.3	0.1	1.1	275	93		N	N	N	N	N	not done	N	N	N	nad	nad	0	0	0	0	0	0	0	0	BITTEN / CRUSHED SNAKE NOS	Snake	Y	Foot/ankle	1	N	0	Y - IHT Mossman	Y	Y	N
1550		21 Oct 2014	10	2014	21 Oct 2014	40	M	148	11.0	5.59	254	no comment	31	2.7	0.1	1.0	183	67		N	N	N	N	N	not done	N	nausea, nil each	N	nad	nad	0	0	0	0	0	0	0	0	BITTEN / CRUSHED SNAKE NOS	Snake	Y	Foot/ankle	1	N	0	Y - IHT Mossman	Y	Y	N
1551		09 Nov 2014	11	2014	09 Nov 2014	40	M	84	8.3	5.2	291	no comment	34	2.8		1.1	93	52		N	N	N	N	N	not done	N	N	N	nad	nad	0	0	0	0	0	0	0	0	BITTEN / CRUSHED SNAKE NOS	Snake	Y	Foot/ankle	1	N	0	Y - IHT Mossman	Y	Y	N
1552		17 May 2017	5	2017	17 May 2017	41	M	151	7.6	5.8	143	no comment	31	2.6	0.2	1.2	160	74		N	N	N	N	N	NA	N	N	N	nad	nad	0	0	0	0	0	0	0	0	BITTEN / CRUSHED SNAKE NOS	Snake	Y	Foot/ankle	1	N	0	Y - IHT Mossman	Y	Y	N
1553		15 Mar 2017	3	2017	15 Mar 2017	46	M	154	6.6	3.68	228	no comment	40	2.3	0.2	0.9	146	92		N	N	N	N	Y	negative	N	N	N	nad	nad	0	0	0	0	0	0	0	0	BITTEN / CRUSHED SNAKE NOS	Snake	Y	Foot/ankle	1	N	0	Y - IHT Mossman	Y	Y	N
1554		22 Apr 2020	4	2020	22 Apr 2020	47	M	151	11.1	6.75	262	no comment	37	3.1	0.1	1.0	96	79		N	N	N	N	N	NA	N	Pain	N	nad	nad	0	0	0	0	0	0	0	0	BITTEN / CRUSHED SNAKE NOS	Snake	Y	Foot/ankle	1	N	0	Y - IHT Mossman	Y	Y	N
1555		04 Jun 2015	6	2015	04 Jun 2015	50	M	150	11.3	7.58	223	no comment	25	3.0	0.1	1.1	328	78		N	N	N	N	N	not done	N	N	N	nad	nad	0	0	0	0	0	0	0	0	BITTEN / CRUSHED SNAKE NOS	Snake	Y	Foot/ankle	1	N	0	Y - IHT Mossman	Y	Y	N
1556		07 Apr 2017	4	2017	07 Apr 2017	50	M	136	5.4	1.84	199	no comment	27	2.6	0.5	0.9	234	58		N	N	N	N	N	NA	N	N	N	nad	nad	0	0	0	0	0	0	0	0	BITTEN / CRUSHED SNAKE NOS	Snake	Y	Foot/ankle	1	N	0	Y - IHT Mossman	Y	Y	N
1557		03 Oct 2014	10	2014	03 Oct 2014	53	M	143	9.9	5.22	340	no comment	34	4.3		1.0	165	69		N	N	N	N	N	not done	N	bite, mild headache	N	nad	nad	0	0	0	0	0	0	0	0	BITTEN / CRUSHED SNAKE NOS	Snake	Y	Foot/ankle	1	N	0	Y - IHT Mossman	Y	Y	N
1558		26 Mar 2016	3	2016	26 Mar 2016	53	M	154	6.3	3.61	156	no comment	28	3.0	0.4	1.2	255	80		N	N	N	N	N	not done	N	N	N	nad	nad	0	0	0	0	0	0	0	0	BITTEN / CRUSHED SNAKE NOS	Snake	Y	Foot/ankle	1	N	0	Y - IHT Mossman	Y	Y	N
1559		09 Sep 2016	9	2016	09 Sep 2016	56	M	145	10.4	7.78	254	no comment	34	3.6	0.4	1.0	136	67		N	N	N	N	N	not done	N	N	N	nad	nad	0	0	0	0	0	0	0	0	BITTEN / CRUSHED SNAKE NOS	Snake	Y	Foot/ankle	1	N	0	Y - IHT Mossman	Y	Y	N
1560		26 Mar 2017	3	2017	26 Mar 2017	64	M	155	7.5	4.46	207	no comment	27	2.9	0.4	1.0	120	94		N	N	N	N	N	NA	N	N	N	nad	nad	0	0	0	0	0	0	0	0	BITTEN / CRUSHED SNAKE NOS	Snake	Y	Foot/ankle	1	N	0	Y - IHT Mossman	Y	Y	N
1561		26 Apr 2020	4	2020	26 Apr 2020	66	M	154	6.8	5.2	152	BFR no fragmented red cells	30	2.1	0.5	1.0	96	66		N	N	N	N	N	NA	N	N	N	nad	nad	0	0	0	0	0	0	0	0	BITTEN / CRUSHED SNAKE NOS	Snake	Y	Foot/ankle	1	N	0	Y - IHT Mossman	Y	Y	N
1562		16 Feb 2016	2	2016	17 Feb 2016	83	M	124	5.5	3.17	203	no comment	29	2.7	0.6	1.1	133	61		N	N	N	N	N	not done	N	minor headache	N	nad	nad	0	0	0	0	0	0	0	0	BITTEN / CRUSHED SNAKE NOS	Snake	Y	Foot/ankle	1	N	0	Y - IHT Mossman	Y	Y	N
1563		29 Dec 2018	12	2018	29 Dec 2018	17	F	125	5.5	2.82	242	no comment	32	2.6	0.6	1.0	88	50		N	N	N	N	N	NA	N	N	N	nad	nad	0	0	0	0	0	0	0	0	BITTEN OR CRUSHED BY NONVENOMOUS SNAKE	Snake	Y	Foot/ankle	1	N	0	Y - IHT Mossman	Y	Y	N
1564		25 Jan 2016	1	2016	25 Jan 2016	18	F	120	14.8	8.14	288	no comment	30	4.3	0.4	1.1	64	60		N	N	N	N	N	not done	N	N	N	nad	nad	0	0	0	0	0	0	0	0	BITTEN OR CRUSHED BY NONVENOMOUS SNAKE	Snake	Y	Foot/ankle	1	N	0	Y - IHT Mossman	Y	Y	N
1565		31 Dec 2019	12	2019	31 Dec 2019	24	F	116	10.1	5.54	381	BFR no fragmented red cells	34	3.1	0.5	1.1	118	65		N	N	N	N	N	NA	N	N	N	nad	nad	0	0	0	0	0	0	0	0	BITTEN OR CRUSHED BY NONVENOMOUS SNAKE	Snake	Y	Foot/ankle	1	N	0	Y - IHT Mossman	Y	Y	N
1566		28 Sep 2017	9	2017	28 Sep 2017	38	F	121	8.4	4.9	211	no comment	30	1.9	0.3	1.2	108	68		N	N	N	N	N	NA	N	N	N	nad	nad	0	0	0	0	0	0	0	0	BITTEN OR CRUSHED BY NONVENOMOUS SNAKE	Snake	Y	Foot/ankle	1	N	0	Y - IHT Mossman	Y	Y	N
1567		15 Jun 2016	6	2016	15 Jun 2016	54	F	133	8.9	6.82	271	no comment	28	4.8		1.1	289	55		N	N	N	N	N	not done	N	N	N	nad	nad	0	0	0	0	0	0	0	0	BITTEN OR CRUSHED BY NONVENOMOUS SNAKE	Snake	Y	Foot/ankle	1	N	0	Y - IHT Mossman	Y	Y	N
1568		09 Sep 2019	9	2019	09 Sep 2019	4	M	129	7.6	2.32	336	no comment	34	1.9	0.3	1.1	222	29		N	N	N	N	N	NA	N	N	N	nad	nad	0	0	0	0	0	0	0	0	BITTEN OR CRUSHED BY NONVENOMOUS SNAKE	Snake	Y	Foot/ankle	1	N	0	Y - IHT Mossman	Y	Y	N
1569		25 Jul 2016	7	2016	25 Jul 2016	17	M	152	8.4	6.17	206	no comment	32	2.2	0.1	1.2	199	85		N	N	N	N	N	not done	N	N	N	nad	nad	0	0	0	0	0	0	0	0	BITTEN OR CRUSHED BY NONVENOMOUS SNAKE	Snake	Y	Foot/ankle	1	N	0	Y - IHT Mossman	Y	Y	N
1570		30 Jan 2015	1	2015	30 Jan 2015	29	M	147	7.2	4.11	214	BFR no fragmented red cells	30	3.8	0.2	1.0	172	83		N	N	N	N	N	not done	N	N	N	nad	nad	0	0	0	0	0	0	0	0	BITTEN OR CRUSHED BY NONVENOMOUS SNAKE	Snake	Y	Foot/ankle	1	N	0	Y - IHT Mossman	Y	Y	N
1571		11 Mar 2016	3	2016	11 Mar 2016	62	M	153	6.5	3.72	115	no comment	30	3.2	0.3	1.0	274	90		N	N	N	N	N	not done	N	N	N	nad	nad	0	0	0	0	0	0	0	0	BITTEN OR CRUSHED BY NONVENOMOUS SNAKE	Snake	Y	Foot/ankle	1	N	0	Y - IHT Mossman	Y	Y	N
1572		25 Sep 2019	9	2019	26 Sep 2019	86	M	117	8.5	5.74	128	no comment	29	2.6	0.3	1.4	82	114		N	N	N	N	N	NA	N	N	N	nad	nad	0	0	0	0	0	0	0	0	BITTEN OR CRUSHED BY NONVENOMOUS SNAKE	Snake	Y	Foot/ankle	1	N	0	Y - IHT Mossman	Y	Y	N
1573		08 Jun 2020	6	2020	08 Jun 2020	41	F	125	8.1	4.58	299	no comment	32	3.3	0.3	1.0	265	56		N	N	N	N	N	NA	N	Leg weakness	N	nad	nad	0	0	0	0	0	0	0	0	CONTACT WITH BLACK SNAKE	Snake	Y	Foot/ankle	1	N	0	Y - IHT Mossman	Y	Y	N
1574		23 Jan 2015	1	2015	23 Jan 2015	45	F	139	8.2	4.74	274	no comment	27	3.4	1.1	1.0	107	51		N	N	N	N	Y	negative	N	N	N	nad	nad	0	0	0	0	0	0	0	0	CONTACT WITH BLACK SNAKE	Snake	Y	Foot/ankle	1	N	0	Y - IHT Mossman	Y	Y	N
1575		01 Jan 2017	1	2017	01 Jan 2017	12	M	116	12.5	9.42	270	no comment	30	5.5	0.5	1.1	84	45		N	N	N	N	N	not done	N	N	N	nad	nad	0	0	0	0	0	0	0	0	CONTACT WITH BROWN SNAKE	Snake	Y	Foot/ankle	1	N	0	Y - IHT Mossman	Y	Y	N
1576		12 Jan 2020	1	2020	12 Jan 2020	50	M	134	6.1	2.59	178	no comment	31	1.3	0.8	1.0	173	93		N	N	N	N	N	NA	N	N	N	nad	nad	0	0	0	0	0	0	0	0	CONTACT WITH UNSPECIFIED VENOMOUS SNAKE	Snake	Y	Foot/ankle	1	N	0	Y - IHT Mossman	Y	Y	N
1601		09 Apr 2018	4	2018	10 Apr 2018	18	M	151	8.0	4.16	230	no comment	24	2.8	0.1	1.1	149	67		N	N	N	N	N	NA	N	N	N	nad	nad	0	0	0	0	0	0	0	0	BITTEN / CRUSHED SNAKE NOS	Snake	Y	Foot/ankle	1	N	0	Y - IHT Mossman	Y	Y	N
1605		18 Apr 2016	4	2016	26 Jun 2017	19	M	136	8.5	4.9	197	BFR no fragmented red cells	26	1.6	0.4	1.0	165	86		N	N	N	N	N	NA	N	Nausea	N	nad	nad	0	0	0	0	0	0	0	0	BITTEN / CRUSHED SNAKE NOS	Snake	Y	Foot/ankle	1	N	0	Y - IHT Pormpuraaw	Y	Y	N
1607		28 Aug 2015	8	2015	29 Aug 2015	11	M	124	10.0	6.71	266	no comment	34	5.4	0.9	1.1	185	40		N	N	N	N	N	not done	N	N	N	nad	nad	0	0	0	0	0	0	0	0	BITTEN / CRUSHED SNAKE NOS	Snake	Y	Foot/ankle	1	N	0	Y - IHT Tully	Y	Y	N
1609		30 Jan 2015	1	2015	30 Jan 2015	20	M	153	14.9	10.72	294	no comment	33	1.8	0.3	1.1	761	61		N	N	N	N	N	not done	N	N	N	nad	nad	0	0	0	0	0	0	0	0	BITTEN / CRUSHED SNAKE NOS	Snake	Y	Foot/ankle	1	N	0	Y - IHT Tully	Y	Y	N
1611		16 Jul 2017	7	2017	16 Jul 2017	23	F	136	9.5	6.28	302	no comment	30	2.2		1.1	68	59		N	N	N	N	N	NA	N	N	N	nad	nad	0	0	0	0	0	0	0	0	BITTEN / CRUSHED SNAKE NOS	Snake	Y	Foot/ankle	1	N	0	Y - IHT Weipa	Y	Y	N
1612		27 Apr 2019	4	2019	28 Apr 2019	25	F	125	11.8	7.62	291	no comment	27	2.7	0.4	1.0	60	68		N	N	N	N	N	NA	N	N	N	nad	nad	0	0	0	0	0	0	0	0	BITTEN / CRUSHED SNAKE NOS	Snake	Y	Foot/ankle	1	N	0	Y - IHT Weipa	Y	Y	N
1613		25 Mar 2016	3	2016	26 Mar 2016	30	F	129	8.4	5.65	216	no comment	27	3.1	0.5	1.1	82	61		N	N	N	N	Y	negative	N	N	N	nad	nad	0	0	0	0	0	0	0	0	BITTEN / CRUSHED SNAKE NOS	Snake	Y	Foot/ankle	1	N	0	Y - IHT Weipa	Y	Y	N
1614		07 Aug 2016	8	2016	07 Aug 2016	30	F	129	11.7	7.35	243	no comment	22	3.8	0.3	1.0	102	58		N	N	N	N	N	not done	N	N	N	nad	nad	0	0	0	0	0	0	0	0	BITTEN / CRUSHED SNAKE NOS	Snake	Y	Foot/ankle	1	N	0	Y - IHT Weipa	Y	Y	N
1615		28 Oct 2019	10	2019	28 Oct 2019	21	M	144	11.9	3.77	306	no comment	30	2.8	0.3	1.1	80	82		N	N	N	N	N	NA	N	Diaphoresis	N	nad	nad	0	0	0	0	0	0	0	0	BITTEN / CRUSHED SNAKE NOS	Snake	Y	Foot/ankle	1	N	0	Y - IHT Weipa	Y	Y	N
1616		11 Feb 2019	2	2019	11 Feb 2019	27	M	127	7.3	4	289	no comment	33	2.0	1.2	1.0	98	87		N	N	N	N	N	NA	N	N	N	nad	nad	0	0	0	0	0	0	0	0	BITTEN / CRUSHED SNAKE NOS	Snake	Y	Foot/ankle	1	N	0	Y - IHT Weipa	Y	Y	N
1617		22 Jul 2018	7	2018	22 Jul 2018	57	M	142	10.2	7.46	246	no comment	30	2.5	0.4	1.1	98	95		N	N	N	N	N	NA	N	N	N	nad	nad	0	0	0	0	0	0	0	0	BITTEN / CRUSHED SNAKE NOS	Snake	Y	Foot/ankle	1	N	0	Y - IHT Weipa	Y	Y	N
1618		16 Mar 2018	3	2018	17 Mar 2018	24	F	136	10.1	5.65	234	no comment	29	2.8	1.0	1.1	84	66		N	Y	N	N	N	NA	N	N	N	nad	nad	0	0	0	0	0	0	0	0	BITTEN OR CRUSHED BY NONVENOMOUS SNAKE	Snake	Y	Foot/ankle	1	N	0	Y - IHT Weipa	Y	Y	N
1619		25 Aug 2018	8	2018	26 Aug 2018	11	M	137	9.3	4.48	306	no comment	29	2.3	0.5	1.1	310	51		N	N	N	N	N	NA	N	N	N	nad	nad	0	0	0	0	0	0	0	0	BITTEN OR CRUSHED BY NONVENOMOUS SNAKE	Snake	Y	Foot/ankle	1	N	0	Y - IHT Weipa	Y	Y	N
1620		18 Apr 2016	4	2016	18 Apr 2016	26	M	147	7.4	4.19	237	no comment	23	1.9	0.3	1.0	115	77		N	N	N	N	Y	negative	N	pain in thigh	N	nad	nad	0	0	0	0	0	0	0	0	CONTACT WITH BROWN SNAKE	Snake	Y	Foot/ankle	1	N	0	Y - IHT Weipa	Y	Y	N
1624		21 Jul 2019	7	2019	22 Jul 2019	58	M	137	9.6	6.88	184	BFR no fragmented red cells	28	2.9	1.2	1.0	100	82	1	N	N	N	N	N	NA	N	N	N	nad	nad	0	0	0	0	0	0	0	0	BITTEN / CRUSHED SNAKE NOS	Snake	Y	Foot/ankle	1	N	1	Y - IHT Weipa	Y	Y	N
1625		17 Apr 2017	4	2017	07 Jan 2016	49	F	129	9.2	4.71	151	no comment	27	5.0	0.6	1.2	2970	124		N	N	N	N	N	not done	N	tingling	N	nad	nad	0	0	0	0	0	0	0	0	BITTEN / CRUSHED SNAKE NOS	Snake	Y	Foot/ankle	1	N	0	Y - IHT Wujal Wujal	Y	Y	N
1626		02 Feb 2016	2	2016	02 Feb 2016	61	F	144	8.1	6.32	189	no comment	26	3.5	0.5	1.0	91	76		N	N	N	N	N	not done	N	N	N	nad	nad	0	0	0	0	0	0	0	0	CONTACT WITH BLACK SNAKE	Snake	Y	Foot/ankle	1	N	0	Y - IHT Wujal Wujal	Y	Y	N
1628		22 Oct 2014	10	2014	22 Oct 2014	30	M	153	14.7	7.93	236	no comment	32	3.7	0.6	1.1	174	95		N	N	N	N	N	not done	N	N	N	nad	nad	0	0	0	0	0	0	0	0	BITTEN / CRUSHED SNAKE NOS	Snake	Y	Foot/ankle	1	N	0	Y - IHT Yarrabah	Y	Y	N
1629		22 Jun 2016	6	2016	23 Jun 2016	2	M	123	9.1	3.38	287	no comment	36	3.5		1.1	200	29		N	N	N	N	N	not done	N	N	N	nad	nad	0	0	0	0	0	0	0	0	CONTACT WITH DEATH ADDER	Snake	Y	Foot/ankle	1	N	0	Y - IHT Yarrabah	Y	Y	N
1636		26 Apr 2018	4	2018	27 Apr 2018	29	F	137	4.6	1.84	174	no comment	28	2.0	0.3	1.1	95	56		N	N	N	N	N	NA	N	N	N	nad	nad	0	0	0	0	0	0	0	0	BITTEN / CRUSHED SNAKE NOS	Snake	Y	Foot/ankle	1	N	0	Y - Lifeflight retrieval	Y	Y	N
1637		03 Mar 2017	3	2017	03 Mar 2017	51	F	129	8.8	7.08	242	no comment	28	3.0		1.1	33	48		N	N	N	N	N	NA	N	N	N	nad	nad	0	0	0	0	0	0	0	0	BITTEN / CRUSHED SNAKE NOS	Snake	Y	Foot/ankle	1	N	0	Y - Lifeflight retrieval	Y	Y	N
1638		19 Dec 2018	12	2018	20 Dec 2018	51	F	149	8.1	5.12	272	BFR no fragmented red cells	24	2.4		1.0	113	67		N	N	N	N	N	NA	N	N	N	nad	nad	0	0	0	0	0	0	0	0	BITTEN / CRUSHED SNAKE NOS	Snake	Y	Foot/ankle	1	N	0	Y - Lifeflight retrieval	Y	Y	N
1639		06 Aug 2017	8	2017	06 Aug 2017	19	M	143	8.6	4.49	173	no comment	30	1.4	0.2	1.3	202	95		N	N	N	N	N	NA	N	N	N	nad	nad	0	0	0	0	0	0	0	0	BITTEN / CRUSHED SNAKE NOS	Snake	Y	Foot/ankle	1	N	0	Y - Lifeflight retrieval	Y	Y	N
1640		20 Jan 2020	1	2020	20 Jan 2020	22	M	165	8.1	6.18	208	no comment	32	1.6	0.4	1.1	1620	103		N	N	N	N	N	NA	N	N	N	nad	nad	0	0	0	0	0	0	0	0	BITTEN / CRUSHED SNAKE NOS	Snake	Y	Foot/ankle	1	N	0	Y - Lifeflight retrieval	Y	Y	N
1641		29 Apr 2018	4	2018	30 Apr 2018	23	M	145	9.5	6.1	199	no comment	29	1.7	0.1	1.0	131	101		N	N	N	N	N	NA	Y	Headache	N	nad	nad	0	0	0	0	0	0	0	0	BITTEN / CRUSHED SNAKE NOS	Snake	Y	Foot/ankle	1	N	0	Y - Lifeflight retrieval	Y	Y	N
1642		27 Oct 2018	10	2018	27 Oct 2018	56	M	137	6.0	3.55	326	no comment	24	3.0	0.4	1.0	182	79		N	N	N	N	N	NA	N	N	N	nad	nad	0	0	0	0	0	0	0	0	BITTEN / CRUSHED SNAKE NOS	Snake	Y	Foot/ankle	1	N	0	Y - Lifeflight retrieval	Y	Y	N
1646		30 Jun 2017	6	2017	01 Jul 2017	26	F	128	8.2	4.81	178	no comment	26	2.0	0.3	1.1	193	78		N	N	N	N	N	NA	N	Nausea, light headed	N	nad	nad	0	0	0	0	0	0	0	0	BITTEN / CRUSHED SNAKE NOS	Snake	Y	Foot/ankle	1	N	0	Y - RFDS	Y	Y	N
1647		06 Apr 2020	4	2020	07 Apr 2020	71	F	138	6.8	3.99	261	no comment	27	3.2	0.4	1.0	156	54		N	N	N	N	N	NA	N	Pain	N	nad	nad	0	0	0	0	0	0	0	0	BITTEN / CRUSHED SNAKE NOS	Snake	Y	Foot/ankle	1	N	0	Y - RFDS	Y	Y	N
1648		21 Aug 2017	8	2017	21 Aug 2017	1	M	113	14.6	7.51	377	BFR no fragmented red cells	35	3.4		1.1	253			N	N	N	N	N	NA	N	N	N	nad	nad	0	0	0	0	0	0	0	0	BITTEN / CRUSHED SNAKE NOS	Snake	Y	Foot/ankle	1	N	0	Y - RFDS	Y	Y	N
1649		26 Jun 2017	6	2017	19 Apr 2016	18	M	160	6.7	3.55	201	no comment	27	2.0		1.1	181	91		N	N	N	N	N	not done	N	N	N	nad	nad	0	0	0	0	0	0	0	0	BITTEN / CRUSHED SNAKE NOS	Snake	Y	Foot/ankle	1	N	0	Y - RFDS	Y	Y	N
1650		13 May 2016	5	2016	13 May 2016	60	M	143	5.9	3.11	241	no comment	31	3.8	0.8	1.1	204	85		N	N	N	N	N	not done	N	N	N	nad	nad	0	0	0	0	0	0	0	0	BITTEN / CRUSHED SNAKE NOS	Snake	Y	Foot/ankle	1	N	0	Y - RFDS	Y	Y	N
1651		29 Oct 2020	10	2020	30 Oct 2020	23	M	158	10.2	6.55	224	no comment	37	2.4	0.1	1.2	249	85		N	N	N	N	N	NA	N	N	N	nad	nad	0	0	0	0	0	0	0	0	CONTACT WITH UNSPECIFIED VENOMOUS SNAKE	Snake	Y	Foot/ankle	1	N	0	Y - RFDS	Y	Y	N
1655		27 Mar 2016	3	2016	27 Mar 2016	7	F	125	9.9	4.07	281	no comment	31	2.2	0.3	1.2	177	32		N	N	N	N	Y	negative	N	N	N	nad	nad	0	0	0	0	0	0	0	0	BITTEN / CRUSHED SNAKE NOS	Snake	Y	Foot/ankle	1	N	0	Y - RFDS	Y	Y	N
1656		09 May 2018	5	2018	10 May 2018	32	F	115	7.4	5.13	196	BFR no fragmented red cells	31	2.0	1.1	1.1	207	53		N	N	N	N	N	NA	N	Nausea, dizzy, pain	N	nad	nad	0	0	0	0	0	0	0	0	BITTEN / CRUSHED SNAKE NOS	Snake	Y	Foot/ankle	1	N	0	Y - RFDS	Y	Y	N
1657		05 Apr 2018	4	2018	05 Apr 2018	21	M	149	9.8	5.79	219	no comment	31	3.3		1.0	145	73		N	N	N	N	N	NA	N	N	N	nad	nad	0	0	0	0	0	0	0	0	BITTEN / CRUSHED SNAKE NOS	Snake	Y	Foot/ankle	1	N	0	Y - RFDS	Y	Y	N
1658		22 May 2017	5	2017	22 May 2017	38	M	118	10.2	5.62	254	no comment	32	3.3	0.4	1.0	418	92		N	N	N	N	N	NA	N	N	N	nad	nad	0	0	0	0	0	0	0	0	BITTEN / CRUSHED SNAKE NOS	Snake	Y	Foot/ankle	1	N	0	Y - RFDS	Y	Y	N
1659		07 Aug 2018	8	2018	08 Aug 2018	67	M	155	6.9	5.28	175	no comment	27	3.5	0.9	1.0	125	73		N	Y	N	N	N	NA	N	N	N	nad	nad	0	0	0	0	0	0	0	0	BITTEN / CRUSHED SNAKE NOS	Snake	Y	Foot/ankle	1	N	0	Y - RFDS	Y	Y	N
1664		24 Apr 2014	4	2014	24 Apr 2014	24	F	143	8.0	4.51	182	no comment	28	2.4	0.4	1.2	111	61		N	N	N	N	N	not done	N	tender at bite site, paraesthesias from PB	N	nad	nad	0	0	0	0	0	0	0	0	BITTEN / CRUSHED SNAKE NOS	Snake	Y	Foot/ankle	1	N	0	Y - Weipa	Y	Y	N
1665		25 Mar 2015	3	2015	25 Mar 2015	18	M	149	9.0	5.55	196	no comment	30	2.6	0.4	1.2	497	71		N	N	N	N	N	not done	N	N	N	nad	nad	0	0	0	0	0	0	0	0	BITTEN / CRUSHED SNAKE NOS	Snake	Y	Foot/ankle	1	N	0	Y - Weipa	Y	Y	N
1666		26 May 2015	5	2015	26 May 2015	28	F	137	6.5	2.84	248	no comment	28	2.7		1.1	150	85		N	N	N	N	N	not done	N	dizzy, achy, urinary symptoms	N	nad	nad	0	0	0	0	0	0	0	0	BITTEN OR CRUSHED BY NONVENOMOUS SNAKE	Snake	Y	Foot/ankle	1	N	0	Y - Weipa	Y	Y	N
1667		03 May 2020	5	2020	03 May 2020	2	M	129	13.4	5.15	369	BFR no fragmented red cells	34	2.3	0.6	1.1	438	29		N	N	N	N	N	NA	N	N	N	nad	nad	0	0	0	0	0	0	0	0	CONTACT WITH UNSPECIFIED VENOMOUS SNAKE	Snake	Y	Foot/ankle	1	N	0	Y - Weipa	Y	Y	N
1669		08 Jun 2015	6	2015	08 Jun 2015	36	M	147	9.7	5.92	291	no comment	27	2.4	0.1	1.0	337	92		N	N	N	N	N	not done	N	N	N	nad	nad	0	0	0	0	0	0	0	0	CONTACT WITH BROWN SNAKE	Snake	Y	Foot/ankle	1	N	1	Y - Weipa	Y	Y	N
1676	Taipan	28 Oct 2014	10	2014	30 Oct 2014	39	M	139	27.1	24.64	226	no comment	33	2.4	26.4	1.1	316	78		N	N	N	N	Y	Taipan (Taipan, Small scaled, Fierce)	N	N/V, diplopia, incontinence, diaphoretic, reduced GCS	Y (1 vial polyvalent AV)	N	coagulopathy	1	0	0	0	0	0	0	0	CONTACT WITH TAIPAN	Snake	Y	Foot/ankle	1	N	0	N	N	N	N
1674		28 Jul 2015	7	2015	28 Jul 2015	4	F	128	10.8	5.24	383	BFR no fragmented red cells	34	3.6		1.1	103	29		N	Y	N	N	N	not done	N	pain, swelling	N	nad	nad	0	0	0	0	0	0	0	0	BITTEN / CRUSHED SNAKE NOS	Snake	Y	Foot/ankle	1	N	0	Y - IHT Kowanyama	Y	Y	N
1678	Taipan	12 Apr 2018	4	2018	14 Apr 2018	59	F	113	6.8	5.18	99	no comment	35	1.9	162.5	1.5	11300	182		N	N	N	N	N	NA	Y	Lethargic	Y - polyvalent	N	Collapse / arrest, witnessed envenomation	0	0	0	0	0	1	0	0	CONTACT WITH BLACK SNAKE	Snake	Y	Foot/ankle	1	Y	3	Y - RFDS	Y	Y	N
1685	Taipan	24 Jul 2017	7	2017	28 Jul 2017	16	M	135	5.8	4.83	170	no comment	23	2.6	23.5	1.1	286	87		N	N	N	N	N	NA	Y	Trouble swallowing, weak, opthalmoplegia	Y - polyvalent x2	N	Taipan envenomation with neurotoxicity + bulbar palsy	0	0	0	0	0	0	1	0	CONTACT WITH TAIPAN	Snake	Y	Foot/ankle	1	Y	1	Y - IHT TI	Y	Y	N
1686	Taipan	21 Dec 2016	12	2016	26 Dec 2016	77	M	85	25.2	13.5	54	BFR no fragmented red cells	200	0.3	1.3	11.0	779	351		Y - 6 units	N	N	N	Y	Taipan (Taipan, Small scaled, Fierce)	Y	cardiac arrest	Y (40000 units of polyvalent antivenom, then brown AV in ED)	N	coagulopathy	1	0	0	0	0	0	0	0	CONTACT WITH TAIPAN	Snake	Y	Foot/ankle	1	N	0	N	N	N	N
1684		20 Dec 2019	12	2019	24 Dec 2019	80	M	111	7.8	5.84	336	no comment	32	4.2	4.0	1.0	90	98		N	N	N	N	N	NA	N	N	N	nad	nad	0	0	0	0	0	0	0	0	BITTEN / CRUSHED SNAKE NOS	Snake	Y	Foot/ankle	1	N	0	N	N	N	N
1688	Taipan	07 Mar 2016	3	2016	14 Mar 2016	33	M	109	14.4	12	63	BFR no fragmented red cells	53	0.5	37.0	1.9	33300	111		N	Y	N	Y	Y	Taipan	Y - ran 150m and collapsed	frank haematemesis, haematuria and excessive bleeding from cannulation sites	Y (12,000 IU Taipan AV)	N	coagulopathy, myopathy	1	1	0	0	0	0	0	0	CONTACT WITH TAIPAN	Snake	Y	Foot/ankle	1	N	1	Y - RFDS	Y	Y	N
1689	Taipan	23 Mar 2014	3	2014	31 Mar 2014	50	M	113	11.6	9.42	153	no comment	42	1.8	4.0	1.2	1730	91	34	N	N	N	N	N	not done	N	ophthalmoplegia, dysphagia	Y	Y (laryngospasm)	myopathy/?neurotoxicity, coagulopathy	1	1	0	0	0	0	1	0	BITTEN / CRUSHED SNAKE NOS	Snake	Y	Foot/ankle	1	Y	2	Y - retrieved PNG	Y	Y	N
1672	Tiger	24 Dec 2018	12	2018	25 Dec 2018	69	F	143	14.0	11.39	238	no comment	66	1.0	256.0	1.7	108	57		N	N	N	N	Y	Tiger snake	Y	Nausea, vomiting, headache, blurred vision	Y - monovalent	Y - anadphylaxis requiring adrenadline infusion	Y - partial VICC + collapse	1	0	0	0	0	1	0	0	CONTACT WITH TIGER SNAKE	Snake	Y	Foot/ankle	1	N	0	Y - IHT Atherton	Y	Y	N
1673	Tiger	26 Aug 2017	8	2017	26 Aug 2017	23	F	138	10.6	7.52	226	BFR no fragmented red cells	44	2.0	256.0	1.5	207	72		N	N	N	N	Y	Tiger snake	N	Nausea, vomiting, palpitations, headache, diplopia	Y - tiger	N	Coagulopathy	1	0	0	0	0	0	0	0	CONTACT WITH TIGER SNAKE	Snake	Y	Foot/ankle	1	N	0	Y - IHT Atherton	Y	Y	N
963		15 Jul 2017	7	2017	15 Jul 2017	32	M	143	5.4	3.12	220	no comment	30	4.7	0.9	1.1	165	70		N	N	N	N	N	NA	N	N	N	nad	nad	0	0	0	0	0	0	0	0	BITTEN / CRUSHED SNAKE NOS	Snake	Y	Hand/wrist	1	N	0	N	N	N	N
964		09 Jan 2019	1	2019	09 Jan 2019	64	F	115	7.5	2.89	238	no comment	24	2.0	0.5	1.0	132	79		N	N	N	N	N	NA	N	N	N	nad	nad	0	0	0	0	0	0	0	0	BITTEN OR CRUSHED BY NONVENOMOUS SNAKE	Snake	Y	Hand/wrist	1	N	0	Y - IHT Mareeba	Y	Y	N
965		29 Oct 2014	10	2014	30 Oct 2014	77	F	135	7.1	4.63	231	BFR no fragmented red cells	25	3.7	0.6	1.1	90	46		N	N	N	N	Y	Brown snake (reportedly in Cooktown)	N	dizzy	N	nad	nad	0	0	0	0	0	0	0	0	BITTEN OR CRUSHED BY NONVENOMOUS SNAKE	Snake	Y	Hand/wrist	1	N	0	Y - IHT Cooktown	Y	Y	N
967		04 Sep 2014	9	2014	05 Sep 2014	45	F	127	9.7	7.24	260	no comment	36	3.0		1.1	649	58		N	Y	N	N	Y	negative	N	pain, swelling, warmth, tender, upper arm then axillarly tenderness. GOT IV THEN PO FLUCLOX.	N	nad	nad	0	0	0	0	0	0	0	0	CONTACT WITH OTHER SPEC VENOMOUS SNAKE	Snake	Y	Hand/wrist	1	N	0	N	N	N	N
1234	Black	27 May 2020	5	2020	28 May 2020	44	F	116	14.9	11.8	505	no comment	103	2.5	1.0	1.2	74	128	27	N	N	N	N	Y	Black snake	N	Headache, nausea, throat tightness, "funny" eye sight, pain	Y - black snake	N	Significant pain / nadusea / abdominadl pain, clinical + biochemical evidence of black snadke envenomation	0	0	0	0	0	0	0	1	BITTEN / CRUSHED SNAKE NOS	Snake	Y	Hand/wrist	1	N	0	N	N	N	N
977		13 Oct 2014	10	2014	14 Oct 2014	2	F	112	7.3	3.06	281	BFR no fragmented red cells	31	2.3	0.5	1.1	86	39		N	N	N	N	N	not done	N	tender bite site	N	nad	nad	0	0	0	0	0	0	0	0	BITTEN / CRUSHED SNAKE NOS	Snake	Y	Hand/wrist	1	N	0	N	N	N	N
1229		31 May 2018	5	2018	01 Jun 2018	0	F					BFR no fragmented red cellsot done					100	29		N	N	N	N	N	NA	N	N	N	nad	nad	0	0	0	0	0	0	0	0	BITTEN / CRUSHED SNAKE NOS	Snake	Y	Hand/wrist	1	N	0	N	N	N	N
1230		08 Jun 2020	6	2020	09 Jun 2020	6	F	121	7.3	3.18	362	no comment	38	2.3	0.3	1.2	168	37		N	N	N	N	N	NA	N	N	N	nad	nad	0	0	0	0	0	0	0	0	BITTEN / CRUSHED SNAKE NOS	Snake	Y	Hand/wrist	1	N	0	N	N	N	N
1231		18 Nov 2019	11	2019	19 Nov 2019	21	F	128	11.0	6.58	168	BFR no fragmented red cells	24	2.4		1.0	102	50		N	N	N	N	N	NA	N	"Fuzzy in the head"	N	nad	nad	0	0	0	0	0	0	0	0	BITTEN / CRUSHED SNAKE NOS	Snake	Y	Hand/wrist	1	N	0	N	N	N	N
1232		08 Jul 2020	7	2020	09 Oct 2019	27	F	129	9.2	3.96	293	BFR no fragmented red cells	27	2.4		1.2	73	69		N	N	N	N	N	NA	N	Nausea, presyncope	N	nad	nad	0	0	0	0	0	0	0	0	BITTEN / CRUSHED SNAKE NOS	Snake	Y	Hand/wrist	1	N	0	N	N	N	N
1233		25 Feb 2018	2	2018	25 Feb 2018	44	F	137	9.3	3.35	343	no comment	24	2.1	0.4	0.9	147	69		N	N	N	N	N	NA	N	Difficulty swallowing, blurry vision	N	nad	nad	0	0	0	0	0	0	0	0	BITTEN / CRUSHED SNAKE NOS	Snake	Y	Hand/wrist	1	N	0	N	N	N	N
1235		07 Jul 2015	7	2015	08 Jul 2015	50	F	139	7.1	3.44	260	no comment	38	2.0		1.1	149	64		N	N	N	N	N	not done	N	N	N	nad	nad	0	0	0	0	0	0	0	0	BITTEN / CRUSHED SNAKE NOS	Snake	Y	Hand/wrist	1	N	0	N	N	N	N
1236		01 Feb 2019	2	2019	02 Feb 2019	56	F	128	5.7	3.33	234	no comment	27	2.5	0.3	1.1	300	82		N	N	N	N	N	NA	N	Nausea	N	nad	nad	0	0	0	0	0	0	0	0	BITTEN / CRUSHED SNAKE NOS	Snake	Y	Hand/wrist	1	N	0	N	N	N	N
1237		28 Oct 2017	10	2017	28 Oct 2017	59	F	127	7.8	6.05	230	no comment	28	3.6	0.3	1.0	84	49		N	N	N	N	N	NA	N	Headache	N	nad	nad	0	0	0	0	0	0	0	0	BITTEN / CRUSHED SNAKE NOS	Snake	Y	Hand/wrist	1	N	0	N	N	N	N
1238		14 Aug 2018	8	2018	14 Aug 2018	61	F	126	5.5	3.26	242	no comment	24	3.5		1.0	120	71		N	N	N	N	N	NA	N	N	N	nad	nad	0	0	0	0	0	0	0	0	BITTEN / CRUSHED SNAKE NOS	Snake	Y	Hand/wrist	1	N	0	N	N	N	N
1239		14 Feb 2017	2	2017	15 Feb 2017	72	F	125	7.6	4.37	128	no comment	26	3.1	0.7	1.0	196	65		N	N	N	N	N	NA	N	N	N	nad	nad	0	0	0	0	0	0	0	0	BITTEN / CRUSHED SNAKE NOS	Snake	Y	Hand/wrist	1	N	0	N	N	N	N
1240		20 Apr 2019	4	2019	20 Apr 2019	6	M	117	8.7	2.95	344	no comment	31	2.7	0.3	1.1	219	40		N	N	N	N	N	NA	N	N	N	nad	nad	0	0	0	0	0	0	0	0	BITTEN / CRUSHED SNAKE NOS	Snake	Y	Hand/wrist	1	N	0	N	N	N	N
1241		17 Feb 2017	2	2017	17 Feb 2017	9	M	132	8.5	5.5	327	no comment	27	2.8	0.2	1.1	117	36		N	N	N	N	N	NA	N	N	N	nad	nad	0	0	0	0	0	0	0	0	BITTEN / CRUSHED SNAKE NOS	Snake	Y	Hand/wrist	1	N	0	N	N	N	N
1242		05 Feb 2015	2	2015	05 Feb 2015	10	M	141	6.9	3.99	264	no comment	37	2.5	0.2	1.1	114	40		N	N	N	N	N	not done	N	pain	N	nad	nad	0	0	0	0	0	0	0	0	BITTEN / CRUSHED SNAKE NOS	Snake	Y	Hand/wrist	1	N	0	N	N	N	N
1243		12 Feb 2019	2	2019	13 Feb 2019	13	M	125	6.3	3.25	180	BFR no fragmented red cells	27	2.3	0.7	1.1	127	62		N	N	N	N	N	NA	N	N	N	nad	nad	0	0	0	0	0	0	0	0	BITTEN / CRUSHED SNAKE NOS	Snake	Y	Hand/wrist	1	N	0	N	N	N	N
1244		15 Jul 2019	7	2019	15 Jul 2019	16	M	141	7.0	4.29	281	BFR no fragmented red cells	24	2.6	0.2	1.1	230	72		N	N	N	N	N	NA	N	N	N	nad	nad	0	0	0	0	0	0	0	0	BITTEN / CRUSHED SNAKE NOS	Snake	Y	Hand/wrist	1	N	0	N	N	N	N
1245		25 Nov 2017	11	2017	26 Nov 2017	17	M	164	14.4	12.9	209	no comment	30	2.0	1.8	1.1	125	87		N	N	N	N	N	NA	N	Urticarial rash, pruritis, chest tightness, arm swelling	N	nad	nad	0	0	0	0	0	0	0	0	BITTEN / CRUSHED SNAKE NOS	Snake	Y	Hand/wrist	1	N	0	N	N	N	N
1246		03 Jan 2017	1	2017	03 Jan 2017	24	M	149	6.3	3.26	210	no comment	28	2.8	0.3	1.0	1060	83		N	N	N	N	N	not done	N	N	N	nad	nad	0	0	0	0	0	0	0	0	BITTEN / CRUSHED SNAKE NOS	Snake	Y	Hand/wrist	1	N	0	N	N	N	N
1247		13 Mar 2016	3	2016	13 Mar 2016	27	M	151	9.9	6.48	293	no comment	30	3.5	0.3	1.0	278	95		N	N	N	N	N	not done	N	numbness and tingling sensation on the finger	N	nad	nad	0	0	0	0	0	0	0	0	BITTEN / CRUSHED SNAKE NOS	Snake	Y	Hand/wrist	1	N	0	N	N	N	N
1248		19 Feb 2019	2	2019	19 Feb 2019	29	M	138	8.7	4.43	173	no comment	34	2.0	0.1	1.1	263	107		N	Y	N	N	N	NA	N	N	N	nad	nad	0	0	0	0	0	0	0	0	BITTEN / CRUSHED SNAKE NOS	Snake	Y	Hand/wrist	1	N	0	N	N	N	N
1249		22 Sep 2014	9	2014	23 Sep 2014	37	M	139	11.6	6.88	281	no comment	29	2.2		1.0	149	60		N	N	N	N	N	not done	N	bite, nil else	N	nad	nad	0	0	0	0	0	0	0	0	BITTEN / CRUSHED SNAKE NOS	Snake	Y	Hand/wrist	1	N	0	N	N	N	N
1250		25 Jul 2020	7	2020	25 Jul 2020	39	M	149	12.3	7.31	247	no comment	27	3.1	0.1	1.0	239	81		N	N	N	N	N	NA	N	Pain, urinary retention	N	nad	nad	0	0	0	0	0	0	0	0	BITTEN / CRUSHED SNAKE NOS	Snake	Y	Hand/wrist	1	N	0	N	N	N	N
1251		23 Sep 2017	9	2017	23 Sep 2017	43	M	142	9.0	5.45	275	no comment	25	2.7	0.6	1.0	206	94		N	N	N	N	N	NA	N	N	N	nad	nad	0	0	0	0	0	0	0	0	BITTEN / CRUSHED SNAKE NOS	Snake	Y	Hand/wrist	1	N	0	N	N	N	N
1252		14 Aug 2020	8	2020	14 Aug 2020	43	M	161	6.8	4.81	264	no comment	26	2.2	0.7	1.1	340	85		N	N	N	N	N	NA	N	Nausea	N	nad	nad	0	0	0	0	0	0	0	0	BITTEN / CRUSHED SNAKE NOS	Snake	Y	Hand/wrist	1	N	0	N	N	N	N
1253		21 Feb 2019	2	2019	21 Feb 2019	46	M	155	11.3	6.14	192	no comment	29	2.9	0.2	1.1	640	94		N	N	N	N	N	NA	N	N	N	nad	nad	0	0	0	0	0	0	0	0	BITTEN / CRUSHED SNAKE NOS	Snake	Y	Hand/wrist	1	N	0	N	N	N	N
1254		18 Oct 2015	10	2015	18 Oct 2015	47	M	138	5.8	3.97	185	no comment	36	2.3	0.1	1.1	59	85		N	N	N	N	N	not done	N	N	N	nad	nad	0	0	0	0	0	0	0	0	BITTEN / CRUSHED SNAKE NOS	Snake	Y	Hand/wrist	1	N	0	N	N	N	N
1255		14 Jan 2014	1	2014	14 Jan 2014	52	M	147	8.8	3.73	252	BFR no fragmented red cells	32	2.7		1.2	315	82		N	N	N	N	N	not done	N	finger bite, no symptoms, drinking EtOH	N	nad	nad	0	0	0	0	0	0	0	0	BITTEN / CRUSHED SNAKE NOS	Snake	Y	Hand/wrist	1	N	0	N	N	N	N
1256		18 Nov 2014	11	2014	18 Nov 2014	57	M	144	8.9	4.97	178	no comment	24	2.2	0.4	0.9	165	122		N	N	N	N	N	not done	N	N	N	nad	nad	0	0	0	0	0	0	0	0	BITTEN / CRUSHED SNAKE NOS	Snake	Y	Hand/wrist	1	N	0	N	N	N	N
1257		22 Aug 2016	8	2016	23 Aug 2016	57	M	138	9.2	4.72	149	no comment	25	2.8	12.1	1.0	117	104		N	N	N	N	N	not done	N	N	N	nad	nad	0	0	0	0	0	0	0	0	BITTEN / CRUSHED SNAKE NOS	Snake	Y	Hand/wrist	1	N	0	N	N	N	N
1258		07 Feb 2020	2	2020	07 Feb 2020	58	M	146	11.6	7.52	256	no comment	30	2.3	0.4	1.0	510	72		N	N	N	N	N	NA	N	N	N	nad	nad	0	0	0	0	0	0	0	0	BITTEN / CRUSHED SNAKE NOS	Snake	Y	Hand/wrist	1	N	0	N	N	N	N
1259		31 Dec 2014	12	2014	01 Jan 2015	64	M	141	7.0	4.61	257	BFR no fragmented red cells	26	2.5	0.8	1.1	195	60		N	N	N	N	N	not done	N	N	N	nad	nad	0	0	0	0	0	0	0	0	BITTEN / CRUSHED SNAKE NOS	Snake	Y	Hand/wrist	1	N	0	N	N	N	N
1260		15 Nov 2015	11	2015	16 Nov 2015	71	M	143	5.0	3.14	192	no comment	30	3.7		1.0	86	68		N	N	N	N	N	not done	N	pain at bite	N	nad	nad	0	0	0	0	0	0	0	0	BITTEN / CRUSHED SNAKE NOS	Snake	Y	Hand/wrist	1	N	0	N	N	N	N
1261		01 Aug 2020	8	2020	02 Aug 2020	71	M	140	5.3	2.84	181	no comment	35	2.1	0.4	1.0	167	84		N	N	N	N	N	NA	N	Pain	N	nad	nad	0	0	0	0	0	0	0	0	BITTEN / CRUSHED SNAKE NOS	Snake	Y	Hand/wrist	1	N	0	N	N	N	N
1262		22 Jun 2020	6	2020	22 Jun 2020	15	F	134	8.0	2.4	262	no comment	28	2.1	0.8	1.2	164	59		N	N	N	N	N	NA	N	N	N	nad	nad	0	0	0	0	0	0	0	0	BITTEN OR CRUSHED BY NONVENOMOUS SNAKE	Snake	Y	Hand/wrist	1	N	0	N	N	N	N
1263		02 Nov 2014	11	2014	02 Nov 2014	22	F	132	10.6	7.54	259	no comment	31	2.7	0.1	1.0	66	45		N	N	N	N	N	not done	N	bite, well	N	nad	nad	0	0	0	0	0	0	0	0	BITTEN OR CRUSHED BY NONVENOMOUS SNAKE	Snake	Y	Hand/wrist	1	N	0	N	N	N	N
1264		19 Sep 2014	9	2014	20 Sep 2014	34	F	114	8.2	5.93	159	no comment	32	5.5		1.1	112	38		N	N	N	N	N	not done	N	bite to finger, some local swelling, nil other infective features	N	nad	nad	0	0	0	0	0	0	0	0	BITTEN OR CRUSHED BY NONVENOMOUS SNAKE	Snake	Y	Hand/wrist	1	N	0	N	N	N	N
1265		17 Jan 2014	1	2014	18 Jan 2014	40	F	131	10.6	5.53	225	no comment	28	2.1		1.0	92	72		N	N	N	N	N	not done	N	finger bite, no symptoms	N	nad	nad	0	0	0	0	0	0	0	0	BITTEN OR CRUSHED BY NONVENOMOUS SNAKE	Snake	Y	Hand/wrist	1	N	0	N	N	N	N
1266		30 Jan 2016	1	2016	30 Jan 2016	53	F	126	5.0	2.63	210	no comment	28	2.6	0.1	1.0	118	61		N	N	N	N	N	not done	N	N	N	nad	nad	0	0	0	0	0	0	0	0	BITTEN OR CRUSHED BY NONVENOMOUS SNAKE	Snake	Y	Hand/wrist	1	N	0	N	N	N	N
1267		11 Apr 2020	4	2020	11 Apr 2020	55	F	153	8.2	5.03	348	no comment	28	3.5	0.3	0.9	269	70		N	N	N	N	N	NA	N	N	N	nad	nad	0	0	0	0	0	0	0	0	BITTEN OR CRUSHED BY NONVENOMOUS SNAKE	Snake	Y	Hand/wrist	1	N	0	N	N	N	N
1268		17 Aug 2018	8	2018	18 Aug 2018	5	M	122	6.8	2.85	246	no comment	31	2.1	0.3	1.1	167	39		N	N	N	N	N	NA	N	N	N	nad	nad	0	0	0	0	0	0	0	0	BITTEN OR CRUSHED BY NONVENOMOUS SNAKE	Snake	Y	Hand/wrist	1	N	0	N	N	N	N
1269		27 Feb 2016	2	2016	27 Feb 2016	6	M	119	14.0	9.26	353	no comment	33	4.0	0.1	1.2	90	34		N	N	N	N	N	not done	N	N	N	nad	nad	0	0	0	0	0	0	0	0	BITTEN OR CRUSHED BY NONVENOMOUS SNAKE	Snake	Y	Hand/wrist	1	N	0	N	N	N	N
1270		10 Mar 2019	3	2019	10 Mar 2019	16	M	139	7.3	4.2	219	no comment	31	1.8	0.5	1.1	238	89		N	N	N	N	N	NA	N	N	N	nad	nad	0	0	0	0	0	0	0	0	BITTEN OR CRUSHED BY NONVENOMOUS SNAKE	Snake	Y	Hand/wrist	1	N	0	N	N	N	N
1271		15 Mar 2018	3	2018	25 Jun 2018	20	M	145	8.0	5.06	264	no comment	27	2.0	0.3	1.1	71	66		N	N	N	N	N	NA	N	Nausea	N	nad	nad	0	0	0	0	0	0	0	0	BITTEN OR CRUSHED BY NONVENOMOUS SNAKE	Snake	Y	Hand/wrist	1	N	0	N	N	N	N
1272		20 Apr 2020	4	2020	20 Apr 2020	19	M	155	14.1	9.71	227	no comment	25	2.2	0.1	1.0	449			N	N	N	N	N	NA	N	N	N	nad	nad	0	0	0	0	0	0	0	0	BITTEN OR CRUSHED BY NONVENOMOUS SNAKE	Snake	Y	Hand/wrist	1	N	0	N	N	N	N
1273		13 Feb 2014	2	2014	13 Feb 2014	20	M	150	7.3	2.78	243	no comment	31	2.6	0.5	1.1	497	81		N	N	N	N	N	not done	N	saw bite, nil else	N	nad	nad	0	0	0	0	0	0	0	0	BITTEN OR CRUSHED BY NONVENOMOUS SNAKE	Snake	Y	Hand/wrist	1	N	0	N	N	N	N
1274		20 Mar 2018	3	2018	21 Mar 2018	23	M	134	7.3	3.18	222	no comment	28	2.4	0.4	1.0	617	90		N	N	N	N	N	NA	N	Dizzy, nausea, pain	N	nad	nad	0	0	0	0	0	0	0	0	BITTEN OR CRUSHED BY NONVENOMOUS SNAKE	Snake	Y	Hand/wrist	1	N	0	N	N	N	N
1275		10 Apr 2019	4	2019	10 Apr 2019	29	M	147	8.9	6.69	199	no comment	30	2.6	0.7	1.2	622	98		N	N	N	N	N	NA	N	N	N	nad	nad	0	0	0	0	0	0	0	0	BITTEN OR CRUSHED BY NONVENOMOUS SNAKE	Snake	Y	Hand/wrist	1	N	0	N	N	N	N
1276		30 Apr 2016	4	2016	30 Apr 2016	30	M	133	9.6	3.56	264	no comment	25	1.9	0.3	1.1	204	81		N	N	N	N	N	not done	N	N	N	nad	nad	0	0	0	0	0	0	0	0	BITTEN OR CRUSHED BY NONVENOMOUS SNAKE	Snake	Y	Hand/wrist	1	N	0	N	N	N	N
1277		12 Dec 2018	12	2018	12 Dec 2018	39	M	143	3.4	1.56	182	BFR no fragmented red cells	27	2.0	0.2	1.2	158	83		N	N	N	N	N	NA	N	N	N	nad	nad	0	0	0	0	0	0	0	0	BITTEN OR CRUSHED BY NONVENOMOUS SNAKE	Snake	Y	Hand/wrist	1	N	0	N	N	N	N
1278		03 Jun 2015	6	2015	03 Jun 2015	42	M	145	8.2	2.8	167	no comment	32	2.4		1.1	240	90		N	N	N	N	N	not done	N	N	N	nad	nad	0	0	0	0	0	0	0	0	BITTEN OR CRUSHED BY NONVENOMOUS SNAKE	Snake	Y	Hand/wrist	1	N	0	N	N	N	N
1279		13 Feb 2020	2	2020	13 Feb 2020	55	M	164	9.7	5.94	268	BFR no fragmented red cells	25	2.3	2.8	1.2	51	84		N	N	N	N	N	NA	N	N	N	nad	nad	0	0	0	0	0	0	0	0	BITTEN OR CRUSHED BY NONVENOMOUS SNAKE	Snake	Y	Hand/wrist	1	N	0	N	N	N	N
1280		04 Sep 2015	9	2015	04 Sep 2015	65	M	136	6.1	2.66	242	no comment	30	3.2	0.4	1.1	158	71		N	N	N	N	N	not done	N	N	N	nad	nad	0	0	0	0	0	0	0	0	BITTEN OR CRUSHED BY NONVENOMOUS SNAKE	Snake	Y	Hand/wrist	1	N	0	N	N	N	N
1281		13 Oct 2017	10	2017	14 Oct 2017	67	M	148	8.8	5.1	202	no comment	26	2.9	0.8	1.1	173	97		N	N	N	N	N	NA	N	N	N	nad	nad	0	0	0	0	0	0	0	0	BITTEN OR CRUSHED BY NONVENOMOUS SNAKE	Snake	Y	Hand/wrist	1	N	0	N	N	N	N
1282		21 Dec 2019	12	2019	22 Dec 2019	70	M	134	6.3	3.68	255	no comment	28	2.5	0.4	0.9	209	103		N	N	N	N	N	NA	N	N	N	nad	nad	0	0	0	0	0	0	0	0	BITTEN OR CRUSHED BY NONVENOMOUS SNAKE	Snake	Y	Hand/wrist	1	N	0	N	N	N	N
1283		28 May 2020	5	2020	29 May 2020	79	M	157	7.3	4.57	222	no comment	27	2.9	0.5	1.1	62	121		N	N	N	N	N	NA	N	N	N	nad	nad	0	0	0	0	0	0	0	0	BITTEN OR CRUSHED BY NONVENOMOUS SNAKE	Snake	Y	Hand/wrist	1	N	0	N	N	N	N
1284		28 Sep 2014	9	2014	28 Sep 2014	19	M	154	8.9	4.84	262	no comment	32	2.8	0.1	1.1	236	97		N	N	N	N	N	not done	N	bite, nil else	N	nad	nad	0	0	0	0	0	0	0	0	CONTACT WITH BROWN SNAKE	Snake	Y	Hand/wrist	1	N	0	N	N	N	N
1285		13 Sep 2016	9	2016	14 Sep 2016	20	M	157	6.9	3.67	186	no comment	32	2.1	0.1	1.0	151	77		N	N	N	N	N	not done	N	N	N	nad	nad	0	0	0	0	0	0	0	0	CONTACT WITH BROWN SNAKE	Snake	Y	Hand/wrist	1	N	0	N	N	N	N
1286		25 Apr 2017	4	2017	25 Apr 2017	29	M	142	7.5	5.44	237	no comment	25	2.4	0.4	1.1	155	95		N	N	N	N	N	NA	N	N	N	nad	nad	0	0	0	0	0	0	0	0	CONTACT WITH BROWN SNAKE	Snake	Y	Hand/wrist	1	N	0	N	N	N	N
1287		02 Apr 2018	4	2018	03 Apr 2018	29	M	129	7.5	4.14	216	no comment	29	2.4	0.3	1.1	431	88		N	N	N	N	N	NA	N	N	N	nad	nad	0	0	0	0	0	0	0	0	CONTACT WITH BROWN SNAKE	Snake	Y	Hand/wrist	1	N	0	N	N	N	N
1408	Black	26 Dec 2016	12	2016	27 Dec 2016	60	M	155	6.3	2.95	239	no comment	24	3.1		1.1	218	75		N	N	N	N	Y	Black snake (Cooktown)	N	Nausea, vomiting and abdo pain, dizzy	Y (polyvalent AV)	N	?N/V/positive VDK	0	0	0	0	0	0	0	1	CONTACT WITH BLACK SNAKE	Snake	Y	Hand/wrist	1	N	0	Y - IHT Cooktown	Y	Y	N
1289		15 May 2015	5	2015	15 May 2015	59	M	135	6.5	3.99	200	BFR no fragmented red cells	28	1.9	0.0	1.0	171	83		N	N	N	N	N	not done	N	mild headache	N	nad	nad	0	0	0	0	0	0	0	0	CONTACT WITH OTHER SPEC VENOMOUS SNAKE	Snake	Y	Hand/wrist	1	N	0	N	N	N	N
1290		09 Jan 2014	1	2014	10 Jan 2014	25	M	155	5.9	2.49	226	no comment	39	1.5		1.2	138	85		N	N	N	N	N	not done	N	watched bite to thumb	N	nad	nad	0	0	0	0	0	0	0	0	CONTACT WITH TAIPAN	Snake	Y	Hand/wrist	1	N	0	N	N	N	N
1292		18 Aug 2018	8	2018	19 Aug 2018	48	F	122	8.6	6	215	no comment	28	3.7	0.3	1.1	185	65		N	N	N	N	N	NA	N	Pain	N	nad	nad	0	0	0	0	0	0	0	0	CONTACT WITH TIGER SNAKE	Snake	Y	Hand/wrist	1	N	0	N	N	N	N
1293		05 Jun 2015	6	2015	05 Jun 2015	26	M	156	7.5	3.77	228	no comment	29	2.2	0.1	1.0	126	55		N	N	N	N	N	not done	N	mild nausea	N	nad	nad	0	0	0	0	0	0	0	0	CONTACT WITH TIGER SNAKE	Snake	Y	Hand/wrist	1	N	0	N	N	N	N
1294		24 Apr 2018	4	2018	24 Apr 2018	49	F	137	9.3	6.04	344	no comment	31	3.4	0.3	1.0	114	67		N	N	N	N	N	NA	N	N	N	nad	nad	0	0	0	0	0	0	0	0	CONTACT WITH UNSPECIFIED VENOMOUS SNAKE	Snake	Y	Hand/wrist	1	N	0	N	N	N	N
1295		23 Nov 2015	11	2015	23 Nov 2015	44	M	146	6.3	3.73	211	no comment	38	2.1		1.1	110	90		N	N	N	N	N	not done	N	anxious and nauseated, blurry vision	N	nad	nad	0	0	0	0	0	0	0	0	CONTACT WITH UNSPECIFIED VENOMOUS SNAKE	Snake	Y	Hand/wrist	1	N	0	N	N	N	N
1422	Brown	31 Dec 2018	12	2018	01 Jan 2019	51	M	139	36.1	31.56	223	BFR no fragmented red cells	200	0.3	256.0	11.0	1170	124		N	N	N	N	Y	Swab - black; urine - brown	Y	Weakness, nausea / vomiting, LOC, diarrhoea	Y - polyvalent	N	Complete consumptive coagulopathy	1	0	0	0	0	0	0	0	CONTACT WITH BROWN SNAKE	Snake	Y	Hand/wrist	1	N	0	Y - IHT Innisfail	Y	Y	N
1357		08 Apr 2019	4	2019	08 Apr 2019	25	M	117	5.2	2.7	191	no comment	30	2.3	1.0	1.2	1050	64		N	N	N	N	N	NA	N	N	N	nad	nad	0	0	0	0	0	0	0	0	BITTEN OR CRUSHED BY NONVENOMOUS SNAKE	Snake	Y	Hand/wrist	1	Y	1	N	N	N	N
1359		26 Sep 2014	9	2014	26 Sep 2014	47	M	152	8.2	4.92	238	no comment	30	3.2	0.2	1.0	348	87		N	N	N	N	N	not done	N	bite, well	N	nad	nad	0	0	0	0	0	0	0	0	BITTEN / CRUSHED SNAKE NOS	Snake	Y	Hand/wrist	1	N	0	Y - GP surgery	N	N	N
1361		28 Apr 2019	4	2019	28 Apr 2019	34	F	136	4.9	3.45	290	no comment	33	2.4	0.4	1.0	350	58		N	N	N	N	N	NA	N	N	N	nad	nad	0	0	0	0	0	0	0	0	BITTEN / CRUSHED SNAKE NOS	Snake	Y	Hand/wrist	1	N	0	Y - direct ref GP	Y	N	N
1365		30 Aug 2017	8	2017	31 Aug 2017	58	M	148	8.3	6.76	137	no comment	25	2.7	1.4	1.1	130	86		N	N	N	N	N	NA	N	N	N	nad	nad	0	0	0	0	0	0	0	0	BITTEN / CRUSHED SNAKE NOS	Snake	Y	Hand/wrist	1	N	0	Y - direct ref GP	Y	N	N
1379		21 Feb 2015	2	2015	21 Feb 2015	21	M	152	18.9	15.19	119	BFR no fragmented red cells	65	0.3	36.0	2.3	434	77		N	N	N	N	N	not done	Y	seizure (Hx epilepsy)	N	nad	nad	0	0	0	0	0	0	0	0	CONTACT WITH TIGER SNAKE	Snake	Y	Hand/wrist	1	N	1	Y - IHT Atherton	Y	Y	N
1387		21 Oct 2018	10	2018	21 Oct 2018	50	M	147	6.8	3.75	236	no comment	26	2.3	0.1	1.1	90	74		N	N	N	N	N	NA	N	N	N	nad	nad	0	0	0	0	0	0	0	0	BITTEN / CRUSHED SNAKE NOS	Snake	Y	Hand/wrist	1	N	0	Y - IHT Babinda	Y	Y	N
1388		08 Jun 2018	6	2018	08 Jun 2018	7	M	116	9.0	2.28	397	no comment	31	2.0	0.3	1.1	329	33		N	N	N	N	N	NA	N	N	N	nad	nad	0	0	0	0	0	0	0	0	BITTEN OR CRUSHED BY NONVENOMOUS SNAKE	Snake	Y	Hand/wrist	1	N	0	Y - IHT Babinda	Y	Y	N
1405		07 Feb 2017	2	2017	08 Feb 2017	39	F	148	8.4	4.75	190	no comment	28	3.2	0.1	1.1	226	69		N	N	N	N	N	NA	N	SOB, abdominal pain, light headed	N	nad	nad	0	0	0	0	0	0	0	0	BITTEN / CRUSHED SNAKE NOS	Snake	Y	Hand/wrist	1	N	0	Y - IHT Cooktown	Y	Y	N
1406		25 Feb 2015	2	2015	25 Feb 2015	46	F	141	12.0	6.67	343	no comment	23	3.7	1.0	1.0	66	57		N	N	N	N	Y	negative	N	N	N	nad	nad	0	0	0	0	0	0	0	0	BITTEN / CRUSHED SNAKE NOS	Snake	Y	Hand/wrist	1	N	0	Y - IHT Cooktown	Y	Y	N
1407		26 Jan 2019	1	2019	26 Jan 2019	71	F	112	9.1	5.19	183	no comment	28	2.9	0.3	1.1	137	91		N	N	N	N	N	NA	N	N	N	nad	nad	0	0	0	0	0	0	0	0	BITTEN OR CRUSHED BY NONVENOMOUS SNAKE	Snake	Y	Hand/wrist	1	N	0	Y - IHT Cooktown	Y	Y	N
1291	Death adder	06 Sep 2018	9	2018	31 Mar 2014	42	M	133	18.1	15.25	219	no comment	27	3.0	0.9	1.2	172	103		N	Y	N	N	Y	negative	N	vomiting on arrival, bandage down: slurred speech/ptosis	Y	N	slurred speech/ptosis/altered GCS	0	0	0	0	0	0	1	0	CONTACT WITH TAIPAN	Snake	Y	Hand/wrist	1	N	0	N	N	N	N
1409		16 Jul 2020	7	2020	17 Jul 2020	65	M	142	7.6	3.71	167	no comment	31	2.2	1.9	1.1	104	111		N	N	N	N	N	NA	N	Bluerred vision, presyncope, dry mouth	N	nad	nad	0	0	0	0	0	0	0	0	CONTACT WITH BROWN SNAKE	Snake	Y	Hand/wrist	1	N	0	Y - IHT Cooktown	Y	Y	N
1418		08 Jun 2020	6	2020	09 Jun 2020	2	M	116	10.9	2.09	295	no comment	31	2.2	0.6	1.0	241	31		N	N	N	N	N	NA	N	Pain	N	nad	nad	0	0	0	0	0	0	0	0	BITTEN OR CRUSHED BY NONVENOMOUS SNAKE	Snake	Y	Hand/wrist	1	N	0	Y - IHT Cooktown	Y	Y	N
1455		30 Aug 2020	8	2020	31 Aug 2020	6	F	132	8.4	3.11	221	no comment	47	2.0	1.0	1.2	134	45		N	N	N	N	N	NA	N	N	N	nad	nad	0	0	0	0	0	0	0	0	BITTEN / CRUSHED SNAKE NOS	Snake	Y	Hand/wrist	1	N	0	Y - IHT Mareeba	Y	Y	N
1456		18 Nov 2019	11	2019	19 Nov 2019	70	F	128	6.7	3.91	177	no comment	29	2.5	1.5	2.2	131	71		N	N	N	N	N	NA	N	Pre syncope	N	nad	nad	0	0	0	0	0	0	0	0	BITTEN / CRUSHED SNAKE NOS	Snake	Y	Hand/wrist	1	N	0	Y - IHT Mareeba	Y	Y	N
1457		11 Aug 2020	8	2020	12 Aug 2020	1	M	108	7.3	0.91	366	no comment	33	1.9	0.4	1.1	333	29		N	N	N	N	N	NA	N	Nausea / vomiting	N	nad	nad	0	0	0	0	0	0	0	0	BITTEN / CRUSHED SNAKE NOS	Snake	Y	Hand/wrist	1	N	0	Y - IHT Mareeba	Y	Y	N
1458		25 Nov 2016	11	2016	25 Nov 2016	16	M	144	6.0	2.65	179	no comment	31	1.6	0.1	1.2	175	83		N	N	N	N	N	not done	N	N	N	nad	nad	0	0	0	0	0	0	0	0	BITTEN / CRUSHED SNAKE NOS	Snake	Y	Hand/wrist	1	N	0	Y - IHT Mareeba	Y	Y	N
1459		25 Feb 2014	2	2014	26 Feb 2014	19	M	148	7.7	5.12	180	no comment	33	2.4		1.2	387	111		N	N	N	N	N	not done	N	pain at bite site, resolved	N	nad	nad	0	0	0	0	0	0	0	0	BITTEN / CRUSHED SNAKE NOS	Snake	Y	Hand/wrist	1	N	0	Y - IHT Mareeba	Y	Y	N
1460		13 Jan 2015	1	2015	14 Jan 2015	20	M	142	9.5	6.5	242	no comment	28	2.3	1.5	1.1	314	83		N	N	N	N	N	not done	N	N	N	nad	nad	0	0	0	0	0	0	0	0	BITTEN / CRUSHED SNAKE NOS	Snake	Y	Hand/wrist	1	N	0	Y - IHT Mareeba	Y	Y	N
1461		08 Feb 2015	2	2015	09 Feb 2015	21	M	154	10.1	6.03	217	no comment	26	1.3	0.1	1.0	274	107		N	N	N	N	N	not done	N	N	N	nad	nad	0	0	0	0	0	0	0	0	BITTEN / CRUSHED SNAKE NOS	Snake	Y	Hand/wrist	1	N	0	Y - IHT Mareeba	Y	Y	N
1462		29 Jan 2020	1	2020	29 Jan 2020	38	M	137	12.9	9.17	341	no comment	28	2.9	0.6	1.1	617	81		N	N	N	N	N	NA	N	N	N	nad	nad	0	0	0	0	0	0	0	0	BITTEN / CRUSHED SNAKE NOS	Snake	Y	Hand/wrist	1	N	0	Y - IHT Mareeba	Y	Y	N
1463		27 Dec 2016	12	2016	28 Dec 2016	52	M	196	9.5	5.46	202	BFR no fragmented red cells	26	2.4	0.2	1.0	122	85		N	N	N	N	N	not done	N	N	N	nad	nad	0	0	0	0	0	0	0	0	BITTEN / CRUSHED SNAKE NOS	Snake	Y	Hand/wrist	1	N	0	Y - IHT Mareeba	Y	Y	N
1464		15 Mar 2014	3	2014	16 Mar 2014	56	M	130	6.1	3.84	214	no comment	26	2.7	1.3	1.1	160	93		N	N	N	N	Y	negative	N	bite, tingling up arm	N	nad	nad	0	0	0	0	0	0	0	0	BITTEN / CRUSHED SNAKE NOS	Snake	Y	Hand/wrist	1	N	0	Y - IHT Mareeba	Y	Y	N
1465		06 Jan 2019	1	2019	07 Jan 2019	69	M	165	11.8	6.91	247	BFR no fragmented red cells	29	4.2	0.4	1.2	246	102		N	N	N	N	N	NA	N	N	N	nad	nad	0	0	0	0	0	0	0	0	BITTEN / CRUSHED SNAKE NOS	Snake	Y	Hand/wrist	1	N	0	Y - IHT Mareeba	Y	Y	N
1466		18 Aug 2020	8	2020	19 Aug 2020	70	M	141	8.1	3	226	no comment	40	3.0	0.5	1.1	247	99		N	Y	N	N	N	NA	N	Heavy eyelids	N	nad	nad	0	0	0	0	0	0	0	0	BITTEN / CRUSHED SNAKE NOS	Snake	Y	Hand/wrist	1	N	0	Y - IHT Mareeba	Y	Y	N
1467		11 Feb 2019	2	2019	12 Feb 2019	71	M	142	7.0	3.8	180	no comment	25	2.9	2.0	1.0	119	69		N	N	N	N	N	NA	N	N	N	nad	nad	0	0	0	0	0	0	0	0	BITTEN / CRUSHED SNAKE NOS	Snake	Y	Hand/wrist	1	N	0	Y - IHT Mareeba	Y	Y	N
1468		11 Feb 2020	2	2020	11 Feb 2020	17	F	141	11.2	5.19	276	BFR no fragmented red cells	36	2.5	0.1	1.0		76		N	N	N	N	N	NA	N	Nausea	N	nad	nad	0	0	0	0	0	0	0	0	BITTEN OR CRUSHED BY NONVENOMOUS SNAKE	Snake	Y	Hand/wrist	1	N	0	Y - IHT Mareeba	Y	Y	N
1470		01 Sep 2020	9	2020	02 Sep 2020	11	M	127	7.4	3.23	214	no comment	31	2.7	0.5	1.0	176	36		N	N	N	N	N	NA	N	Pain	N	nad	nad	0	0	0	0	0	0	0	0	BITTEN OR CRUSHED BY NONVENOMOUS SNAKE	Snake	Y	Hand/wrist	1	N	0	Y - IHT Mareeba	Y	Y	N
1288	Taipan	30 Mar 2014	3	2014	06 Sep 2018	47	M	140	16.6	12.31	177	no comment	140	0.3	256.0	2.1	163	101		N	N	N	N	N	NA	N	N	Y - taipan	N	Partial VICC	1	0	0	0	0	0	0	0	CONTACT WITH DEATH ADDER	Snake	Y	Hand/wrist	1	N	0	N	N	N	N
1497		03 Dec 2015	12	2015	03 Dec 2015	7	F	120	7.1	3.74	340	BFR no fragmented red cells	37	3.4	0.6	1.2	229	47		N	N	N	N	N	not done	N	pain	N	nad	nad	0	0	0	0	0	0	0	0	BITTEN / CRUSHED SNAKE NOS	Snake	Y	Hand/wrist	1	N	0	Y - IHT Mareeba	Y	Y	N
1498		05 Jan 2016	1	2016	05 Jan 2016	7	M	133	6.4	2.61	229	no comment	27	2.9		1.1	87	49	1	N	N	N	N	N	not done	N	pain	N	nad	nad	0	0	0	0	0	0	0	0	BITTEN / CRUSHED SNAKE NOS	Snake	Y	Hand/wrist	1	N	0	Y - IHT Mareeba	Y	Y	N
1499		08 Nov 2018	11	2018	08 Nov 2018	12	M	129	8.6	4.94	357	no comment	30	3.7	1.2	1.1	227	50		N	N	N	N	N	NA	N	N	N	nad	nad	0	0	0	0	0	0	0	0	BITTEN / CRUSHED SNAKE NOS	Snake	Y	Hand/wrist	1	N	0	Y - IHT Mareeba	Y	Y	N
1500		17 Oct 2018	10	2018	17 Oct 2018	22	M	149	11.6	6.99	340	no comment	23	2.6	0.4	1.0	200	85		N	N	N	N	N	NA	N	N	N	nad	nad	0	0	0	0	0	0	0	0	BITTEN / CRUSHED SNAKE NOS	Snake	Y	Hand/wrist	1	N	0	Y - IHT Mareeba	Y	Y	N
1501		08 Feb 2016	2	2016	08 Feb 2016	26	M	155	8.4	3.78	250	no comment	29	1.8	0.1	1.1	399	81		N	N	N	N	N	not done	N	N	N	nad	nad	0	0	0	0	0	0	0	0	BITTEN / CRUSHED SNAKE NOS	Snake	Y	Hand/wrist	1	N	0	Y - IHT Mareeba	Y	Y	N
1502		18 Jan 2018	1	2018	18 Jan 2018	50	M	149	7.0	4.17	205	no comment	28	3.1	0.6	1.1	93	84		N	N	N	N	N	NA	N	N	N	nad	nad	0	0	0	0	0	0	0	0	BITTEN / CRUSHED SNAKE NOS	Snake	Y	Hand/wrist	1	N	0	Y - IHT Mareeba	Y	Y	N
1503		31 Aug 2018	8	2018	01 Sep 2018	16	M	153	7.6	4.73	298	no comment	30	2.0	0.2	1.1	197	66		N	N	N	N	N	NA	N	N	N	nad	nad	0	0	0	0	0	0	0	0	BITTEN OR CRUSHED BY NONVENOMOUS SNAKE	Snake	Y	Hand/wrist	1	N	0	Y - IHT Mareeba	Y	Y	N
1504		29 Aug 2017	8	2017	30 Aug 2017	29	M	138	11.6	9.39	218	no comment	28	2.2	0.1	1.0	123	76		N	N	N	N	N	NA	N	N	N	nad	nad	0	0	0	0	0	0	0	0	BITTEN OR CRUSHED BY NONVENOMOUS SNAKE	Snake	Y	Hand/wrist	1	N	0	Y - IHT Mareeba	Y	Y	N
1505		12 Aug 2017	8	2017	12 Aug 2017	17	M	187	12.1	7.96	258	no comment	28	3.2	0.1	1.2	597	68		N	N	N	N	Y	Brown snake	N	N	N	nad	nad	0	0	0	0	0	0	0	0	CONTACT WITH BROWN SNAKE	Snake	Y	Hand/wrist	1	N	0	Y - IHT Mareeba	Y	Y	N
1506		23 Mar 2016	3	2016	23 Mar 2016	42	M	167	4.9	2.85	132	no comment	24	2.6	0.1	1.0	92	67		N	N	N	N	N	not done	N	N	N	nad	nad	0	0	0	0	0	0	0	0	CONTACT WITH BROWN SNAKE	Snake	Y	Hand/wrist	1	N	0	Y - IHT Mareeba	Y	Y	N
1577		21 Feb 2016	2	2016	21 Feb 2016	16	F	124	7.4	3.93	197	no comment	28	2.9	1.3	1.1	108	56		N	Y	N	N	N	not done	N	N	N	nad	nad	0	0	0	0	0	0	0	0	BITTEN / CRUSHED SNAKE NOS	Snake	Y	Hand/wrist	1	N	0	Y - IHT Mossman	Y	Y	N
1578		15 Oct 2014	10	2014	15 Oct 2014	26	F	134	11.6	7.32	278	no comment	28	2.5	0.9	0.9	185			N	N	N	N	N	not done	N	N	N	nad	nad	0	0	0	0	0	0	0	0	BITTEN / CRUSHED SNAKE NOS	Snake	Y	Hand/wrist	1	N	0	Y - IHT Mossman	Y	Y	N
1579		13 Oct 2018	10	2018	14 Oct 2018	45	F	124	10.4	7.38	227	no comment	25	2.7	1.0	1.0	109	80		N	N	N	N	N	NA	N	Nausea	N	nad	nad	0	0	0	0	0	0	0	0	BITTEN / CRUSHED SNAKE NOS	Snake	Y	Hand/wrist	1	N	0	Y - IHT Mossman	Y	Y	N
1580		05 Oct 2014	10	2014	06 Oct 2014	9	M	127	6.2	3.46	202	no comment	27	1.8	0.3	1.0	108	51		N	N	N	N	N	not done	N	bite to hand, nil else	N	nad	nad	0	0	0	0	0	0	0	0	BITTEN / CRUSHED SNAKE NOS	Snake	Y	Hand/wrist	1	N	0	Y - IHT Mossman	Y	Y	N
1581		10 Jan 2017	1	2017	10 Jan 2017	55	M	151	9.4	3.84	200	BFR no fragmented red cells	30	2.8	0.2	1.0	70	64		N	N	N	N	N	not done	N	Some stinging of the finger	N	nad	nad	0	0	0	0	0	0	0	0	BITTEN / CRUSHED SNAKE NOS	Snake	Y	Hand/wrist	1	N	0	Y - IHT Mossman	Y	Y	N
1582		30 Aug 2016	8	2016	30 Aug 2016	65	M	135	9.4	5.54	229	no comment	31	3.0		1.1	128	96		N	N	N	N	N	not done	N	N	N	nad	nad	0	0	0	0	0	0	0	0	BITTEN / CRUSHED SNAKE NOS	Snake	Y	Hand/wrist	1	N	0	Y - IHT Mossman	Y	Y	N
1583		15 Jul 2019	7	2019	16 Jul 2019	16	M	143	12.2	9.65	236	no comment	35	2.8	0.7	1.3	1660	82	13	N	Y	N	N	N	NA	N	N	N	nad	nad	0	0	0	0	0	0	0	0	CONTACT WITH BLACK SNAKE	Snake	Y	Hand/wrist	1	N	0	Y - IHT Mossman	Y	Y	N
1584		31 May 2019	5	2019	04 Jun 2018	47	M	135	12.2	9.81	218	no comment	31	2.0	35.8	1.0	439	81		N	N	N	N	N	NA	N	N	N	nad	nad	0	0	0	0	0	0	0	0	CONTACT WITH TAIPAN	Snake	Y	Hand/wrist	1	N	0	Y - IHT Mossman	Y	Y	N
1600		05 Apr 2015	4	2015	06 Apr 2015	47	M	132	7.4	7.4	225	no comment	22	3.0	0.3	1.0	253	63		N	Y	N	N	N	not done	N	wrist pain, nausea	N	nad	nad	0	0	0	0	0	0	0	0	BITTEN / CRUSHED SNAKE NOS	Snake	Y	Hand/wrist	1	Y	0	Y - IHT Mossman	Y	Y	N
1602		06 May 2018	5	2018	06 May 2018	39	F	132	8.2	5.68	219	no comment	33	3.2	1.1	1.0	136	42		N	N	N	N	N	NA	N	N	N	nad	nad	0	0	0	0	0	0	0	0	BITTEN / CRUSHED SNAKE NOS	Snake	Y	Hand/wrist	1	N	0	Y - IHT Mossman	Y	Y	N
1603		08 Jun 2015	6	2015	08 Jun 2015	67	F	137	16.8	12.06	337	no comment	26	3.0	0.9	1.0	155	63		N	N	N	N	Y	negative	N	mild paraesthesia	N	nad	nad	0	0	0	0	0	0	0	0	BITTEN / CRUSHED SNAKE NOS	Snake	Y	Hand/wrist	1	N	0	Y - IHT Pompuraaw	Y	Y	N
1608		14 Feb 2017	2	2017	14 Feb 2017	13	M	143	9.5	4.34	261	no comment	28	2.8	0.3	1.1	206	60		N	N	N	N	N	NA	N	N	N	nad	nad	0	0	0	0	0	0	0	0	BITTEN OR CRUSHED BY NONVENOMOUS SNAKE	Snake	Y	Hand/wrist	1	N	0	Y - IHT Tully	Y	Y	N
1610		21 Oct 2014	10	2014	21 Oct 2014	21	M	143	8.0	4.46	182	no comment	37	2.1	0.1	1.3	272	90		N	N	N	N	N	not done	N	N	N	nad	nad	0	0	0	0	0	0	0	0	BITTEN / CRUSHED SNAKE NOS	Snake	Y	Hand/wrist	1	N	0	Y - IHT Tully	Y	Y	N
1621		15 May 2018	5	2018	15 May 2018	29	M	140	9.1	5.61	241	no comment	29	2.2	0.4	1.0	290	65		N	N	N	N	N	NA	N	Nausea	N	nad	nad	0	0	0	0	0	0	0	0	BITTEN / CRUSHED SNAKE NOS	Snake	Y	Hand/wrist	1	N	0	Y - IHT Weipa	Y	Y	N
1630		26 Sep 2014	9	2014	27 Sep 2014	26	M	136	25.0	21.81	243	no comment	32	2.7	0.1	1.1	164	84		N	N	N	N	N	not done	N	bite, nil else	N	nad	nad	0	0	0	0	0	0	0	0	CONTACT WITH BLACK SNAKE	Snake	Y	Hand/wrist	1	N	0	Y - IHT Yarrabah	Y	Y	N
1631		08 Apr 2015	4	2015	08 Apr 2015	22	M	141	9.8	5.13	331	no comment	35	3.0	0.1	1.1	263	91		N	N	N	N	N	not done	N	N	N	nad	nad	0	0	0	0	0	0	0	0	CONTACT WITH DEATH ADDER	Snake	Y	Hand/wrist	1	N	0	Y - IHT Yarrabah	Y	Y	N
1632		16 May 2017	5	2017	17 May 2017	39	M	134	8.1	4.6	161	no comment	29	3.5	3.5	1.2	354	68		N	N	N	N	N	NA	N	N	N	nad	nad	0	0	0	0	0	0	0	0	CONTACT WITH DEATH ADDER	Snake	Y	Hand/wrist	1	N	0	Y - IHT Yarrabah	Y	Y	N
1633		10 Feb 2016	2	2016	10 Feb 2016	20	M	149	13.2	8.6	233	no comment	27	4.6	0.6	1.3	265	47		N	N	N	N	N	not done	N	N	N	nad	nad	0	0	0	0	0	0	0	0	CONTACT WITH UNSPECIFIED VENOMOUS SNAKE	Snake	Y	Hand/wrist	1	N	0	Y - IHT Yarrabah	Y	Y	N
1643		22 Sep 2018	9	2018	23 Sep 2018	36	M	143	12.6	9.58	293	no comment	37	2.0	79.3	1.2	368	90		N	Y	N	N	N	NA	N	Headache, pain	N	nad	nad	0	0	0	0	0	0	0	0	CONTACT WITH UNSPECIFIED VENOMOUS SNAKE	Snake	Y	Hand/wrist	1	N	0	Y - Lifeflight retrieval	Y	Y	N
1652		09 May 2017	5	2017	09 May 2017	39	F	138	5.8	3.11	218	no comment	27	3.0	0.8	1.1	72	57		N	N	N	N	N	NA	N	N	N	nad	nad	0	0	0	0	0	0	0	0	BITTEN / CRUSHED SNAKE NOS	Snake	Y	Hand/wrist	1	N	0	Y - RFDS	Y	Y	N
1660		24 Feb 2016	2	2016	25 Feb 2016	32	M	146	12.9	9.47	348	no comment	33	4.4	1.5	1.1	140	91		N	N	N	N	N	not done	N	aching pain in right lower foot.	N	nad	nad	0	0	0	0	0	0	0	0	BITTEN OR CRUSHED BY NONVENOMOUS SNAKE	Snake	Y	Hand/wrist	1	N	0	Y - RFDS	Y	Y	N
1668		21 Mar 2014	3	2014	21 Mar 2014	26	M	147	7.8	4.85	212	no comment	37	2.6	0.4	1.1	130	101		N	N	N	N	Y	Taipan	N	watched bits to fingers, nil else	N	nad	nad	0	0	0	0	0	0	0	0	BITTEN / CRUSHED SNAKE NOS	Snake	Y	Hand/wrist	1	N	0	Y - Weipa	Y	Y	N
1670		05 Jan 2018	1	2018	05 Jan 2018	79	F	136	6.4	3.84	295	no comment	25	2.6	0.5	1.1	72	78		N	N	N	N	N	NA	N	N	N	nad	nad	0	0	0	0	0	0	0	0	BITTEN OR CRUSHED BY NONVENOMOUS SNAKE	Snake	Y	Hand/wrist	1	N	0	Y - IHT Mossman	Y	Y	N
1671		23 Apr 2016	4	2016	23 Apr 2016	42	M	151	11.7	8.15	264	no comment	34	4.3	0.3	1.1	154	81		N	N	N	N	N	not done	N	N	N	nad	nad	0	0	0	0	0	0	0	0	BITTEN / CRUSHED SNAKE NOS	Snake	Y	Hand/wrist	1	N	0	N	N	N	N
1296	Taipan	03 Jun 2018	6	2018	01 Jun 2019	48	M	136	23.6	20.87	158	BFR no fragmented red cells	38	1.3	256.0	1.2	3110	187		N	N	N	N	Y	Taipan	N	Abdominal pain, nausea, vomiting	Y - taipan	N	Partial VICC + rhabdo	1	1	0	0	0	0	0	0	CONTACT WITH UNSPECIFIED VENOMOUS SNAKE	Snake	Y	Hand/wrist	1	N	0	N	N	N	N
1675		02 Feb 2019	2	2019	02 Feb 2019	55	F	117	7.3	4.61	282	BFR no fragmented red cells	40	5.1	1.0	1.3	89	51		N	N	N	N	N	NA	N	Myalgia, vomiting, lymphadenopathy	N	nad	nad	0	0	0	0	0	0	0	0	CONTACT WITH BLACK SNAKE	Snake	Y	Hand/wrist	1	N	0	Y - IHT Innisfail	Y	Y	N
1680	Taipan	23 Aug 2017	8	2017	25 Aug 2017	15	M	118	24.5	20.24	259	BFR no fragmented red cells	85	0.9	256.0	1.8	1160	78		N	N	N	N	Y	Taipan	N	Haematemesis, ptosis, drowsy	Y - taipan	N	Partial VICC, neurotoxicity	1	0	0	0	0	0	1	0	CONTACT WITH TAIPAN	Snake	Y	Hand/wrist	1	N	0	Y - RFDS	Y	Y	N
1471	Tiger	20 Dec 2013	12	2013	20 Dec 2013	23	M	149	11.6	8.2	173	no comment	46	1.0	37.0	1.6	90	74		N	N	N	N	Y	Black snake then tiger then taipan in that order (Mareeba)	N	headache, abdo pain, pain at bite, microscopic haematuria	Y	Y (hives/lower lip itch/swelling)	coagulopathy, VDK+	1	0	0	0	0	0	0	0	CONTACT WITH OTHER SPEC VENOMOUS SNAKE	Snake	Y	Hand/wrist	1	N	0	Y - IHT Mareeba	Y	Y	N
975		27 Apr 2016	4	2016	27 Apr 2016	53	F	133	7.5	4.29	209	no comment	25	3.5	0.3	1.0	50	69		N	N	N	N	N	not done	N	N	N	nad	nad	0	0	0	0	0	0	0	0	BITTEN / CRUSHED SNAKE NOS	Snake	Y	Head/neck	0	N	0	N	N	N	N
1377		20 Jul 2020	7	2020	20 Jul 2020	24	F	122	10.2	6.29	303	no comment	26	3.1	0.4	0.9	934	61		N	N	N	N	N	NA	N	Headache	N	nad	nad	0	0	0	0	0	0	0	0	BITTEN / CRUSHED SNAKE NOS	Snake	Y	Head/neck	0	N	0	Y - IHT Arukun	Y	Y	N
1661		25 Nov 2018	11	2018	26 Nov 2018	2	M	114	8.6	3.56	199	no comment	29	2.0		1.1	81	29		N	N	N	N	N	NA	N	N	N	nad	nad	0	0	0	0	0	0	0	0	BITTEN / CRUSHED SNAKE NOS	Snake	Y	Head/neck	0	N	0	Y - RFDS	Y	Y	N
961		31 Mar 2017	3	2017	01 Apr 2017	54	F					BFR no fragmented red cellsot done								N	N	N	N	N	NA	N	N	N	nad	nad	0	0	0	0	0	0	0	0	BITTEN OR CRUSHED BY NONVENOMOUS SNAKE	Snake	Y	Leg	1	N	0	N	N	N	N
1297		13 Nov 2015	11	2015	14 Nov 2015	2	F	142	14.0	3.26	313	BFR no fragmented red cells	31	2.4	0.2	1.0	224	51		N	N	N	N	N	not done	N	N	N	nad	nad	0	0	0	0	0	0	0	0	BITTEN / CRUSHED SNAKE NOS	Snake	Y	Leg	1	N	0	N	N	N	N
1298		16 May 2016	5	2016	16 May 2016	2	F	118	8.0	2.3	321	no comment	28	2.7	0.1	1.1	218	30		N	N	N	N	N	not done	N	N	N	nad	nad	0	0	0	0	0	0	0	0	BITTEN / CRUSHED SNAKE NOS	Snake	Y	Leg	1	N	0	N	N	N	N
1299		30 Oct 2017	10	2017	30 Oct 2017	5	F	119	11.8	9.1	442	no comment	34	2.1	0.3	1.2	133	40		N	N	N	N	N	NA	N	N	N	nad	nad	0	0	0	0	0	0	0	0	BITTEN / CRUSHED SNAKE NOS	Snake	Y	Leg	1	N	0	N	N	N	N
1300		27 Oct 2018	10	2018	28 Oct 2018	5	F	101	11.1	3.47	246	no comment	37	2.4	0.5	1.1	160	30		N	N	N	N	N	NA	N	N	N	nad	nad	0	0	0	0	0	0	0	0	BITTEN / CRUSHED SNAKE NOS	Snake	Y	Leg	1	N	0	N	N	N	N
1301		11 Oct 2017	10	2017	12 Oct 2017	7	F	128	9.3	6.01	274	no comment	33	2.4	0.4	1.2	273	59		N	N	N	N	N	N	N	N	N	nad	nad	0	0	0	0	0	0	0	0	BITTEN / CRUSHED SNAKE NOS	Snake	Y	Leg	1	N	0	N	N	N	N
1302		20 Apr 2019	4	2019	21 Apr 2019	8	F	127	8.1	4.21	360	BFR no fragmented red cells	36	2.4		1.2	168	48		N	N	N	N	N	NA	N	N	N	nad	nad	0	0	0	0	0	0	0	0	BITTEN / CRUSHED SNAKE NOS	Snake	Y	Leg	1	N	0	N	N	N	N
1303		31 Dec 2017	12	2017	01 Jan 2018	11	F	126	11.1	9.56	425	no comment	31	1.9	0.5	1.0	69	43		N	N	N	N	N	NA	N	N	N	nad	nad	0	0	0	0	0	0	0	0	BITTEN / CRUSHED SNAKE NOS	Snake	Y	Leg	1	N	0	N	N	N	N
1304		09 Sep 2019	9	2019	10 Sep 2019	11	F	121	6.9	3.6	322	no comment	32	2.4	0.4	1.1	146	49		N	Y	N	N	N	NA	N	Pain	N	nad	nad	0	0	0	0	0	0	0	0	BITTEN / CRUSHED SNAKE NOS	Snake	Y	Leg	1	N	0	N	N	N	N
1306		03 Aug 2016	8	2016	03 Aug 2016	22	F	135	5.5	2.52	177	BFR no fragmented red cells	28	3.3	0.6	1.0	120	73		N	N	N	N	N	not done	N	N	N	nad	nad	0	0	0	0	0	0	0	0	BITTEN / CRUSHED SNAKE NOS	Snake	Y	Leg	1	N	0	N	N	N	N
1307		27 Oct 2020	10	2020	28 Oct 2020	31	F	140	7.4	3.79	203	no comment	35	2.8	0.3	1.0	124	60		N	N	N	N	N	NA	N	N	N	nad	nad	0	0	0	0	0	0	0	0	BITTEN / CRUSHED SNAKE NOS	Snake	Y	Leg	1	N	0	N	N	N	N
1308		03 Dec 2016	12	2016	03 Dec 2016	54	F	132	10.4	5.04	294	no comment	24	2.6	0.4	1.0	150	87		N	N	N	N	N	not done	N	itchy, burning, nausea	N	nad	nad	0	0	0	0	0	0	0	0	BITTEN / CRUSHED SNAKE NOS	Snake	Y	Leg	1	N	0	N	N	N	N
1309		03 Oct 2020	10	2020	03 Oct 2020	55	F	167	9.9	4.93	164	no comment	32	3.5	0.6	1.1	296	65		N	N	N	N	N	NA	N	N	N	nad	nad	0	0	0	0	0	0	0	0	BITTEN / CRUSHED SNAKE NOS	Snake	Y	Leg	1	N	0	N	N	N	N
1310		01 Jul 2019	7	2019	02 Jul 2019	60	F	123	8.5	4.21	227	no comment	29	3.1	0.4	1.0	125	67		N	N	N	N	N	NA	N	Feeling weak	N	nad	nad	0	0	0	0	0	0	0	0	BITTEN / CRUSHED SNAKE NOS	Snake	Y	Leg	1	N	0	N	N	N	N
1311		04 May 2018	5	2018	05 May 2018	61	F	118	7.0	4.04	203	no comment	28	3.3	0.6	0.9	88	67		N	N	N	N	N	NA	N	N	N	nad	nad	0	0	0	0	0	0	0	0	BITTEN / CRUSHED SNAKE NOS	Snake	Y	Leg	1	N	0	N	N	N	N
1312		22 Jan 2019	1	2019	22 Jan 2019	64	F	138	7.9	3.85	188	no comment	25	2.0		1.0	101	63		N	N	N	N	N	NA	N	N	N	nad	nad	0	0	0	0	0	0	0	0	BITTEN / CRUSHED SNAKE NOS	Snake	Y	Leg	1	N	0	N	N	N	N
1313		31 Jul 2018	7	2018	01 Aug 2018	67	F	123	7.2	3.04	219	no comment	29	2.5	1.0	1.1	58	54		N	N	N	N	N	NA	N	N	N	nad	nad	0	0	0	0	0	0	0	0	BITTEN / CRUSHED SNAKE NOS	Snake	Y	Leg	1	N	0	N	N	N	N
1314		02 Nov 2014	11	2014	03 Nov 2014	4	M	119	8.9	6.36	282	BFR no fragmented red cells	29	3.4	1.5	1.0	171	29		N	N	N	N	N	not done	N	distressed, pain	N	nad	nad	0	0	0	0	0	0	0	0	BITTEN / CRUSHED SNAKE NOS	Snake	Y	Leg	1	N	0	N	N	N	N
1315		09 Mar 2017	3	2017	10 Mar 2017	6	M	128	8.8	4.44	281	no comment	32	2.5	0.4	1.1	119	45		N	N	N	N	N	NA	N	Pain	N	nad	nad	0	0	0	0	0	0	0	0	BITTEN / CRUSHED SNAKE NOS	Snake	Y	Leg	1	N	0	N	N	N	N
1316		28 May 2017	5	2017	28 May 2017	9	M	141	7.7	5.25	270	no comment	27	1.9	0.2	1.2	223	41		N	N	N	N	N	NA	N	N	N	nad	nad	0	0	0	0	0	0	0	0	BITTEN / CRUSHED SNAKE NOS	Snake	Y	Leg	1	N	0	N	N	N	N
1317		13 Feb 2020	2	2020	13 Feb 2020	10	M	124	3.5	1.26	207	BFR no fragmented red cells	30	1.8	0.3	1.1	192	50		N	N	N	N	N	NA	N	N	N	nad	nad	0	0	0	0	0	0	0	0	BITTEN / CRUSHED SNAKE NOS	Snake	Y	Leg	1	N	0	N	N	N	N
1318		02 May 2019	5	2019	03 May 2019	11	M	121	5.4	2.49	289	BFR no fragmented red cells	40	1.8		1.2	137	51	1	N	N	N	N	N	NA	N	N	N	nad	nad	0	0	0	0	0	0	0	0	BITTEN / CRUSHED SNAKE NOS	Snake	Y	Leg	1	N	0	N	N	N	N
1319		30 Oct 2014	10	2014	30 Oct 2014	12	M	121	10.8	5.83	205	BFR no fragmented red cells	33	2.0		1.2	268	60		N	N	N	N	N	not done	N	N	N	nad	nad	0	0	0	0	0	0	0	0	BITTEN / CRUSHED SNAKE NOS	Snake	Y	Leg	1	N	0	N	N	N	N
1320		28 Apr 2020	4	2020	29 Apr 2020	15	M	131	9.6	6.2	289	no comment	29	1.9	0.3	1.0	153	91		N	N	N	N	N	NA	N	Pain	N	nad	nad	0	0	0	0	0	0	0	0	BITTEN / CRUSHED SNAKE NOS	Snake	Y	Leg	1	N	0	N	N	N	N
1321		24 Jun 2018	6	2018	15 Mar 2018	19	M	138	7.7	4.81	246	no comment	27	1.9	6.0	1.1	65	71		N	N	N	N	N	NA	N	Pain, headache, nausea	N	nad	nad	0	0	0	0	0	0	0	0	BITTEN / CRUSHED SNAKE NOS	Snake	Y	Leg	1	N	0	N	N	N	N
1322		02 Mar 2020	3	2020	03 Mar 2020	26	M	158	8.8	4.64	230	no comment	28	2.0	0.1	1.0	151	175		N	N	N	N	N	NA	N	Fingers tingling	N	nad	nad	0	0	0	0	0	0	0	0	BITTEN / CRUSHED SNAKE NOS	Snake	Y	Leg	1	N	0	N	N	N	N
1323		16 Jul 2020	7	2020	17 Jul 2020	27	M	148	7.7	5.44	160	BFR no fragmented red cells	36	2.8	0.2	1.0	410	104		N	N	N	N	N	NA	N	Pain	N	nad	nad	0	0	0	0	0	0	0	0	BITTEN / CRUSHED SNAKE NOS	Snake	Y	Leg	1	N	0	N	N	N	N
1324		31 Oct 2020	10	2020	31 Oct 2020	27	M	139	8.0	5.58	225	no comment	31	2.0	0.3	1.1	147	96		N	N	N	N	N	NA	N	N	N	nad	nad	0	0	0	0	0	0	0	0	BITTEN / CRUSHED SNAKE NOS	Snake	Y	Leg	1	N	0	N	N	N	N
1325		02 Oct 2015	10	2015	03 Oct 2015	30	M	139	22.5	19.28	176	BFR no fragmented red cells	37	2.0		1.1	238	89		N	N	N	N	N	not done	N	N	N	nad	nad	0	0	0	0	0	0	0	0	BITTEN / CRUSHED SNAKE NOS	Snake	Y	Leg	1	N	0	N	N	N	N
1326		01 Jan 2019	1	2019	02 Jan 2019	33	M	145	9.5	4.49	240	BFR no fragmented red cells	27	2.9	0.3	0.9	148	96		N	N	N	N	N	NA	N	N	N	nad	nad	0	0	0	0	0	0	0	0	BITTEN / CRUSHED SNAKE NOS	Snake	Y	Leg	1	N	0	N	N	N	N
1327		25 Mar 2016	3	2016	25 Mar 2016	34	M	139	6.7	3.85	223	no comment	35	2.8		1.1	288	90		N	N	N	N	N	not done	N	N	N	nad	nad	0	0	0	0	0	0	0	0	BITTEN / CRUSHED SNAKE NOS	Snake	Y	Leg	1	N	0	N	N	N	N
1328		02 May 2014	5	2014	03 May 2014	37	M	150	8.3	3.55	233	no comment	34	2.3	0.3	1.0	184	72		N	N	N	N	N	not done	N	tender at bite site	N	nad	nad	0	0	0	0	0	0	0	0	BITTEN / CRUSHED SNAKE NOS	Snake	Y	Leg	1	N	0	N	N	N	N
1329		20 Feb 2017	2	2017	20 Feb 2017	43	M	146	8.8	4.01	208	no comment	29	4.0		1.1	665	124		N	N	N	N	Y	negative	N	N	N	nad	nad	0	0	0	0	0	0	0	0	BITTEN / CRUSHED SNAKE NOS	Snake	Y	Leg	1	N	0	N	N	N	N
1330		30 Jan 2018	1	2018	30 Jan 2018	48	M	139	7.2	4.25	202	no comment	28	1.7	0.1	1.0	67	85		N	N	N	N	N	NA	N	N	N	nad	nad	0	0	0	0	0	0	0	0	BITTEN / CRUSHED SNAKE NOS	Snake	Y	Leg	1	N	0	N	N	N	N
1331		30 Dec 2016	12	2016	31 Dec 2016	55	M	142	5.2	2.78	171	no comment	30	2.2	0.2	1.1	222	74		N	N	N	N	N	not done	N	N	N	nad	nad	0	0	0	0	0	0	0	0	BITTEN / CRUSHED SNAKE NOS	Snake	Y	Leg	1	N	0	N	N	N	N
1332		20 Feb 2014	2	2014	20 Feb 2014	56	M	146	9.6	5.96	220	no comment	27	5.2	0.7	1.1	507	72		N	N	N	N	N	not done	N	saw bite, minor pain	N	nad	nad	0	0	0	0	0	0	0	0	BITTEN / CRUSHED SNAKE NOS	Snake	Y	Leg	1	N	0	N	N	N	N
1333		20 Aug 2020	8	2020	21 Aug 2020	62	M	136	9.6	5.48	126	no comment	35	2.8	1.1	1.0	242	102		N	N	N	N	N	NA	N	Pain	N	nad	nad	0	0	0	0	0	0	0	0	BITTEN / CRUSHED SNAKE NOS	Snake	Y	Leg	1	N	0	N	N	N	N
1334		14 Mar 2020	3	2020	15 Mar 2020	63	M	150	7.5	4.7	126	no comment	44	2.9	1.8	3.3	217	105		N	N	N	N	N	NA	N	N	N	nad	nad	0	0	0	0	0	0	0	0	BITTEN / CRUSHED SNAKE NOS	Snake	Y	Leg	1	N	0	N	N	N	N
1335		25 Aug 2016	8	2016	26 Aug 2016	64	M	141	6.1	3.7	174	no comment	25	3.3	0.3	1.0	153	69		N	N	N	N	N	not done	N	N	N	nad	nad	0	0	0	0	0	0	0	0	BITTEN / CRUSHED SNAKE NOS	Snake	Y	Leg	1	N	0	N	N	N	N
1336		29 Mar 2016	3	2016	29 Mar 2016	74	M	141	10.0	8.8	225	no comment	23	2.5	0.3	1.0	78	57		N	N	N	N	N	not done	N	mild headache	N	nad	nad	0	0	0	0	0	0	0	0	BITTEN / CRUSHED SNAKE NOS	Snake	Y	Leg	1	N	0	N	N	N	N
1337		26 Mar 2018	3	2018	27 Mar 2018	7	F	142	9.8	4.17	235	no comment	30	2.6	0.8	1.1	251	40		N	N	N	N	N	NA	N	N	N	nad	nad	0	0	0	0	0	0	0	0	BITTEN OR CRUSHED BY NONVENOMOUS SNAKE	Snake	Y	Leg	1	N	0	N	N	N	N
1338		20 Oct 2018	10	2018	21 Oct 2018	10	F	123	6.9	4.22	274	no comment	38	2.5	0.1	1.3	106	36		N	N	N	N	N	NA	N	N	N	nad	nad	0	0	0	0	0	0	0	0	BITTEN OR CRUSHED BY NONVENOMOUS SNAKE	Snake	Y	Leg	1	N	0	N	N	N	N
1339		03 Mar 2019	3	2019	04 Mar 2019	7	M	120	7.3	2.99	310	no comment	36	1.9	0.3	1.1	85	33		N	N	N	N	N	NA	N	N	N	nad	nad	0	0	0	0	0	0	0	0	BITTEN OR CRUSHED BY NONVENOMOUS SNAKE	Snake	Y	Leg	1	N	0	N	N	N	N
1340		20 Mar 2016	3	2016	20 Mar 2016	18	M	153	6.8	3.67	231	no comment	31	3.5	0.1	1.1	177	94		N	N	N	N	N	not done	N	N	N	nad	nad	0	0	0	0	0	0	0	0	BITTEN OR CRUSHED BY NONVENOMOUS SNAKE	Snake	Y	Leg	1	N	0	N	N	N	N
1341		28 Jul 2017	7	2017	29 Jul 2017	25	M	140	4.3	2.3	174	no comment	28	2.5	0.8	1.1	245	85		N	N	N	N	N	NA	N	N	N	nad	nad	0	0	0	0	0	0	0	0	BITTEN OR CRUSHED BY NONVENOMOUS SNAKE	Snake	Y	Leg	1	N	0	N	N	N	N
1342		23 Aug 2018	8	2018	24 Aug 2018	53	M	138	7.8	5.97	225	no comment	29	2.4		1.0	419	108		N	N	N	N	N	NA	N	N	N	nad	nad	0	0	0	0	0	0	0	0	BITTEN OR CRUSHED BY NONVENOMOUS SNAKE	Snake	Y	Leg	1	N	0	N	N	N	N
1343		11 May 2020	5	2020	11 May 2020	61	M	148	3.9	2.13	248	no comment	29	2.4	0.4	1.0	84	78		N	N	N	N	N	NA	N	N	N	nad	nad	0	0	0	0	0	0	0	0	BITTEN OR CRUSHED BY NONVENOMOUS SNAKE	Snake	Y	Leg	1	N	0	N	N	N	N
1344		01 Jan 2017	1	2017	02 Jan 2017	15	F	124	13.0	7.5	250	no comment	28	3.9	0.2	1.1	74	73		N	Y	N	N	N	not done	N	N	N	nad	nad	0	0	0	0	0	0	0	0	CONTACT WITH BLACK SNAKE	Snake	Y	Leg	1	N	0	N	N	N	N
1345		18 Mar 2016	3	2016	19 Mar 2016	2	M	122	10.0	2.08	255	no comment	42	2.0	0.3	1.0	188	30		N	N	N	N	N	not done	N	N	N	nad	nad	0	0	0	0	0	0	0	0	CONTACT WITH BROWN SNAKE	Snake	Y	Leg	1	N	0	N	N	N	N
1346		04 Apr 2015	4	2015	04 Apr 2015	15	M	147	10.7	4.51	254	no comment	33	2.5	0.3	1.1	267	82		N	N	N	N	N	not done	N	lightheaded	N	nad	nad	0	0	0	0	0	0	0	0	CONTACT WITH BROWN SNAKE	Snake	Y	Leg	1	N	0	N	N	N	N
1347		24 Aug 2019	8	2019	25 Aug 2019	21	M	147	13.1	10.35	186	BFR no fragmented red cells	29	2.0	0.3	1.1	344	98		N	N	N	N	N	NA	N	Blurry vision	N	nad	nad	0	0	0	0	0	0	0	0	CONTACT WITH BROWN SNAKE	Snake	Y	Leg	1	N	0	N	N	N	N
1348		26 Nov 2018	11	2018	27 Nov 2018	61	M	129	5.8	3.46	102	BFR no fragmented red cells	24	2.2	0.4	1.0	110	76		N	N	N	N	N	NA	N	N	N	nad	nad	0	0	0	0	0	0	0	0	CONTACT WITH BROWN SNAKE	Snake	Y	Leg	1	N	0	N	N	N	N
1356		06 Oct 2020	10	2020	06 Oct 2020	41	M	144	7.9	3.96	197	no comment	36	2.6	0.3	0.9	95	67		N	N	N	N	N	NA	N	N	N	nad	nad	0	0	0	0	0	0	0	0	BITTEN / CRUSHED SNAKE NOS	Snake	Y	Leg	1	Y	0	N	N	N	N
1358		28 Nov 2018	11	2018	29 Nov 2018	22	M	150	9.5	5.56	237	no comment	30	2.2	0.3	1.1	406	107		N	N	N	N	Y	Brown snake	N	N	N	nad	nad	0	0	0	0	0	0	0	0	BITTEN / CRUSHED SNAKE NOS	Snake	Y	Leg	1	N	0	Y - DAMA ED	N	N	N
1367		31 Jul 2017	7	2017	01 Aug 2017	30	F	122	6.0	3.64	193	no comment	26	2.7	0.2	1.1	101	58		N	N	N	N	N	NA	N	Headache, nausea	N	nad	nad	0	0	0	0	0	0	0	0	BITTEN / CRUSHED SNAKE NOS	Snake	Y	Leg	1	N	0	Y - GP	Y	N	N
1370		30 Sep 2018	9	2018	30 Sep 2018	58	F	118	6.2	2.83	184	no comment	24	2.3	0.3	0.9	86	44		N	N	N	N	N	NA	N	N	N	nad	nad	0	0	0	0	0	0	0	0	BITTEN / CRUSHED SNAKE NOS	Snake	Y	Leg	1	N	0	Y - Careflight	Y	Y	N
1378		17 May 2016	5	2016	17 May 2016	5	F	115	11.6	6.86	344	no comment	34	3.1	0.2	1.1	164	29		N	N	N	N	N	not done	N	N	N	nad	nad	0	0	0	0	0	0	0	0	BITTEN / CRUSHED SNAKE NOS	Snake	Y	Leg	1	N	0	Y - IHT Arukun	Y	Y	N
1389		04 Dec 2017	12	2017	05 Dec 2017	6	M	146	5.4	1.93	314	BFR no fragmented red cells	33	2.1	0.1	1.1	86	48		N	N	N	N	N	NA	N	N	N	nad	nad	0	0	0	0	0	0	0	0	BITTEN / CRUSHED SNAKE NOS	Snake	Y	Leg	1	N	0	Y - IHT Babinda	Y	Y	N
1390		25 Oct 2020	10	2020	26 Oct 2020	40	M	152	11.4	6.36	240	no comment	32	2.0	0.3	1.0	322	122		N	N	N	N	N	NA	N	Nausea, diarrhoea, burning around bite site	N	nad	nad	0	0	0	0	0	0	0	0	BITTEN OR CRUSHED BY NONVENOMOUS SNAKE	Snake	Y	Leg	1	N	0	Y - IHT Babinda	Y	Y	N
1410		09 Aug 2020	8	2020	09 Aug 2020	10	F	125	4.4	2.16	239	no comment	35	2.4	0.4	1.2	228	44	1	N	N	N	N	N	NA	N	N	N	nad	nad	0	0	0	0	0	0	0	0	BITTEN / CRUSHED SNAKE NOS	Snake	Y	Leg	1	N	0	Y - IHT Cooktown	Y	Y	N
1411		07 Jul 2017	7	2017	07 Jul 2017	33	F	115	11.4	7.65	282	no comment	26	5.7	1.3	1.0	80	52		N	N	N	N	N	NA	N	N	N	nad	nad	0	0	0	0	0	0	0	0	BITTEN / CRUSHED SNAKE NOS	Snake	Y	Leg	1	N	0	Y - IHT Cooktown	Y	Y	N
1412		24 Apr 2020	4	2020	24 Apr 2020	10	M	130	7.9	3.97	294	BFR no fragmented red cells	33	3.2	0.4	1.1	197	47		N	N	N	N	N	NA	N	Pain	N	nad	nad	0	0	0	0	0	0	0	0	BITTEN / CRUSHED SNAKE NOS	Snake	Y	Leg	1	N	0	Y - IHT Cooktown	Y	Y	N
1413		22 Mar 2020	3	2020	22 Mar 2020	8	M	138	6.6	3.19	230	no comment	33	2.1	0.4	1.2	164	35		N	N	N	N	N	NA	N	Pain	N	nad	nad	0	0	0	0	0	0	0	0	BITTEN OR CRUSHED BY NONVENOMOUS SNAKE	Snake	Y	Leg	1	N	0	Y - IHT Cooktown	Y	Y	N
1416		23 Nov 2014	11	2014	24 Nov 2014	43	F	135	11.2	7.2	281	no comment	25	2.8		1.0	138	74		N	N	N	N	N	not done	N	N	N	nad	nad	0	0	0	0	0	0	0	0	BITTEN OR CRUSHED BY NONVENOMOUS SNAKE	Snake	Y	Leg	1	N	1	Y - IHT Cooktown	Y	Y	N
1419		31 Dec 2016	12	2016	31 Dec 2016	31	M	165	7.3	4.69	182	no comment	36	3.1	0.2	1.1	145	89		N	N	N	N	N	not done	N	N	N	nad	nad	0	0	0	0	0	0	0	0	BITTEN / CRUSHED SNAKE NOS	Snake	Y	Leg	1	N	0	Y - IHT Dimbulah	Y	Y	N
1429		10 Aug 2016	8	2016	10 Aug 2016	27	F	147	7.0	3.54	171	no comment	24	1.7	0.2	1.0	68	58		N	N	N	N	Y	negative	N	slight numbness & tingling around mouth/hyperventil	N	nad	nad	0	0	0	0	0	0	0	0	BITTEN / CRUSHED SNAKE NOS	Snake	Y	Leg	1	N	0	Y - IHT Lockhart River	Y	Y	N
1472		27 Dec 2016	12	2016	28 Dec 2016	62	F	144	7.7	5.01	257	no comment	26	3.7	0.2	1.0	119	96		N	N	N	N	N	not done	N	N	N	nad	nad	0	0	0	0	0	0	0	0	BITTEN / CRUSHED SNAKE NOS	Snake	Y	Leg	1	N	0	Y - IHT Mareeba	Y	Y	N
1473		16 Mar 2015	3	2015	16 Mar 2015	1	M	108	10.2	5.22	201	BFR no fragmented red cells	33	2.8	0.3	1.3	119	29	1	N	N	N	N	N	not done	N	N	N	nad	nad	0	0	0	0	0	0	0	0	BITTEN / CRUSHED SNAKE NOS	Snake	Y	Leg	1	N	0	Y - IHT Mareeba	Y	Y	N
1474		06 Sep 2019	9	2019	06 Sep 2019	15	M	148	9.2	5.49	195	no comment	33	2.7	0.8	1.1	206	80		N	N	N	N	N	NA	N	N	N	nad	nad	0	0	0	0	0	0	0	0	BITTEN / CRUSHED SNAKE NOS	Snake	Y	Leg	1	N	0	Y - IHT Mareeba	Y	Y	N
1475		30 Oct 2020	10	2020	30 Oct 2020	33	M	152	4.9	2.42	207	BFR no fragmented red cells	34	2.0	0.2	1.1	170	84		N	N	N	N	Y (Mareeba)	negative	N	N	N	nad	nad	0	0	0	0	0	0	0	0	BITTEN / CRUSHED SNAKE NOS	Snake	Y	Leg	1	N	0	Y - IHT Mareeba	Y	Y	N
1476		07 Sep 2020	9	2020	08 Sep 2020	43	M	156	8.5	4.88	197	no comment	41	2.7	0.6	1.0	634	94		N	N	N	N	N	NA	N	Tingling in hands	N	nad	nad	0	0	0	0	0	0	0	0	BITTEN / CRUSHED SNAKE NOS	Snake	Y	Leg	1	N	0	Y - IHT Mareeba	Y	Y	N
1477		08 Oct 2020	10	2020	09 Oct 2020	33	F	137	12.2	7.98	237	no comment	33	2.5	0.2	1.0	277	67		N	N	N	N	N	NA	N	Nausea / vomiting	N	nad	nad	0	0	0	0	0	0	0	0	CONTACT WITH BROWN SNAKE	Snake	Y	Leg	1	N	0	Y - IHT Mareeba	Y	Y	N
1478		03 Oct 2020	10	2020	04 Oct 2020	21	M	144	9.6	5.16	165	no comment	35	2.1	0.1	1.3	442	98		N	Y	N	N	N	NA	N	Headache, muscle pain	N	nad	nad	0	0	0	0	0	0	0	0	BITTEN OR CRUSHED BY NONVENOMOUS SNAKE	Snake	Y	Leg	1	Y	0	Y - IHT Mareeba	Y	Y	N
1507		21 Mar 2017	3	2017	21 Mar 2017	16	F	132	9.1	6.16	208	no comment	27	2.6	0.5	1.1	84	63		N	N	N	N	N	NA	N	Abdominal pain, headache	N	nad	nad	0	0	0	0	0	0	0	0	BITTEN / CRUSHED SNAKE NOS	Snake	Y	Leg	1	N	0	Y - IHT Mareeba	Y	Y	N
1508		29 Jun 2017	6	2017	30 Jun 2017	31	F	132	7.0	3.93	227	BFR no fragmented red cells	32	3.0	1.0	1.2	122	51		N	N	N	N	N	NA	N	N	N	nad	nad	0	0	0	0	0	0	0	0	BITTEN / CRUSHED SNAKE NOS	Snake	Y	Leg	1	N	0	Y - IHT Mareeba	Y	Y	N
1509		15 Mar 2018	3	2018	16 Mar 2018	77	F	120	8.9	4.08	237	no comment	26	2.8		1.0	120	89		N	N	N	N	N	NA	N	N	N	nad	nad	0	0	0	0	0	0	0	0	BITTEN / CRUSHED SNAKE NOS	Snake	Y	Leg	1	N	0	Y - IHT Mareeba	Y	Y	N
1510		23 Sep 2017	9	2017	23 Sep 2017	10	M	127	9.2	4.29	323	no comment	31	2.2	0.1	1.1	140	43		N	N	N	N	N	NA	N	Nausea	N	nad	nad	0	0	0	0	0	0	0	0	BITTEN / CRUSHED SNAKE NOS	Snake	Y	Leg	1	N	0	Y - IHT Mareeba	Y	Y	N
1511		10 Jan 2017	1	2017	10 Jan 2017	19	M	155	10.6	5.82	278	no comment	30	3.3	0.2	1.1	245	107		N	N	N	N	N	NA	N	Pain	N	nad	nad	0	0	0	0	0	0	0	0	BITTEN / CRUSHED SNAKE NOS	Snake	Y	Leg	1	N	0	Y - IHT Mareeba	Y	Y	N
1512		23 Jan 2018	1	2018	23 Jan 2018	24	M	145	8.4	6.02	208	no comment	27	2.0	0.3	1.1	330	103		N	N	N	N	N	NA	N	Nausea, light headed	N	nad	nad	0	0	0	0	0	0	0	0	BITTEN / CRUSHED SNAKE NOS	Snake	Y	Leg	1	N	0	Y - IHT Mareeba	Y	Y	N
1513		08 Nov 2018	11	2018	08 Nov 2018	36	M	143	8.9	5.49	202	no comment	27	2.0	0.1	1.0	236	82		N	N	N	N	N	NA	N	Light headed	N	nad	nad	0	0	0	0	0	0	0	0	BITTEN / CRUSHED SNAKE NOS	Snake	Y	Leg	1	N	0	Y - IHT Mareeba	Y	Y	N
1514		23 Nov 2018	11	2018	23 Nov 2018	66	M	139	9.8	6.15	157	BFR no fragmented red cells	25	2.9	1.4	1.0	377	81		N	N	N	N	N	NA	N	N	N	nad	nad	0	0	0	0	0	0	0	0	BITTEN OR CRUSHED BY NONVENOMOUS SNAKE	Snake	Y	Leg	1	N	0	Y - IHT Mareeba	Y	Y	N
1585		28 Oct 2014	10	2014	28 Oct 2014	27	F	119	9.3	4.93	248	no comment	26	3.1	0.8	1.1	93	63		N	N	N	N	N	not done	N	chest pain	N	nad	nad	0	0	0	0	0	0	0	0	BITTEN / CRUSHED SNAKE NOS	Snake	Y	Leg	1	N	0	Y - IHT Mossman	Y	Y	N
1586		20 Sep 2015	9	2015	20 Sep 2015	36	F	134	12.6	9.18	166	no comment	36	3.6	4.0	1.1	165	48		N	N	N	N	N	not done	N	felt 'funny and numb' afterwards	N	nad	nad	0	0	0	0	0	0	0	0	BITTEN / CRUSHED SNAKE NOS	Snake	Y	Leg	1	N	0	Y - IHT Mossman	Y	Y	N
1587		23 Nov 2018	11	2018	23 Nov 2018	41	F	127	11.1	6.41	225	no comment	25	2.4	0.7	1.0	193	86		N	N	N	N	N	NA	N	N	N	nad	nad	0	0	0	0	0	0	0	0	BITTEN / CRUSHED SNAKE NOS	Snake	Y	Leg	1	N	0	Y - IHT Mossman	Y	Y	N
1588		23 Feb 2016	2	2016	23 Feb 2016	53	F	119	7.0	3.49	270	no comment	26	2.7	0.2	1.0	66	65		N	N	N	N	N	not done	N	N	N	nad	nad	0	0	0	0	0	0	0	0	BITTEN / CRUSHED SNAKE NOS	Snake	Y	Leg	1	N	0	Y - IHT Mossman	Y	Y	N
1589		30 Oct 2015	10	2015	31 Oct 2015	63	F	110	7.1	2.15	221	BFR no fragmented red cells	28	2.0	0.3	1.1	56	89		N	N	N	N	N	not done	N	chest/abdo pain	N	nad	nad	0	0	0	0	0	0	0	0	BITTEN / CRUSHED SNAKE NOS	Snake	Y	Leg	1	N	0	Y - IHT Mossman	Y	Y	N
1590		07 Dec 2015	12	2015	08 Dec 2015	7	M	116	9.0	6.11	244	no comment	34	4.7	0.4	1.1	75	29		N	N	N	N	N	not done	N	N	N	nad	nad	0	0	0	0	0	0	0	0	BITTEN / CRUSHED SNAKE NOS	Snake	Y	Leg	1	N	0	Y - IHT Mossman	Y	Y	N
1591		06 Mar 2020	3	2020	06 Mar 2020	15	M	152	7.1	4.25	188	no comment	27	2.2	1.0	1.1	423	58		N	N	N	N	N	NA	N	N	N	nad	nad	0	0	0	0	0	0	0	0	BITTEN / CRUSHED SNAKE NOS	Snake	Y	Leg	1	N	0	Y - IHT Mossman	Y	Y	N
1592		11 Nov 2017	11	2017	11 Nov 2017	17	M	164	6.8	3.57	240	no comment	30	2.6	0.1	1.0	310	75		N	N	N	N	N	NA	N	N	N	nad	nad	0	0	0	0	0	0	0	0	BITTEN / CRUSHED SNAKE NOS	Snake	Y	Leg	1	N	0	Y - IHT Mossman	Y	Y	N
1593		02 Aug 2014	8	2014	02 Aug 2014	27	M	151	6.9	3.25	209	no comment	36	2.1		1.1	196	86		N	N	N	N	N	not done	N	N	N	nad	nad	0	0	0	0	0	0	0	0	BITTEN / CRUSHED SNAKE NOS	Snake	Y	Leg	1	N	0	Y - IHT Mossman	Y	Y	N
1594		24 Feb 2018	2	2018	24 Feb 2018	27	M	150	7.3	4.17	245	no comment	27	2.6	0.4	1.1	580	95		N	N	N	N	N	NA	N	N	N	nad	nad	0	0	0	0	0	0	0	0	BITTEN / CRUSHED SNAKE NOS	Snake	Y	Leg	1	N	0	Y - IHT Mossman	Y	Y	N
1595		29 Nov 2016	11	2016	29 Nov 2016	45	M	146	5.9	3.44	214	no comment	30	3.6	0.2	1.2	102	65		N	N	N	N	N	not done	N	N	N	nad	nad	0	0	0	0	0	0	0	0	BITTEN / CRUSHED SNAKE NOS	Snake	Y	Leg	1	N	0	Y - IHT Mossman	Y	Y	N
1596		29 Nov 2018	11	2018	30 Nov 2018	48	M	131	6.2	3.14	197	no comment	28	2.3	0.4	1.1	312	86		N	N	N	N	N	NA	N	Dizzy, nausea	N	nad	nad	0	0	0	0	0	0	0	0	BITTEN / CRUSHED SNAKE NOS	Snake	Y	Leg	1	N	0	Y - IHT Mossman	Y	Y	N
1597		26 Sep 2016	9	2016	27 Sep 2016	73	M	144	7.0	4.05	139	no comment	26	2.6	2.5	1.0	219	79		N	N	N	N	N	not done	N	pain at site	N	nad	nad	0	0	0	0	0	0	0	0	BITTEN / CRUSHED SNAKE NOS	Snake	Y	Leg	1	N	0	Y - IHT Mossman	Y	Y	N
1598		23 Oct 2020	10	2020	24 Oct 2020	60	F	124	6.6	3.4	251	no comment	38	2.4	0.4	1.1	106	64		N	N	N	N	N	NA	N	N	N	nad	nad	0	0	0	0	0	0	0	0	CONTACT WITH BROWN SNAKE	Snake	Y	Leg	1	N	0	Y - IHT Mossman	Y	Y	N
1604		04 Apr 2018	4	2018	04 Apr 2018	39	M	129	9.5	4.88	216	no comment	33	2.8	0.4	1.0	214	93		N	N	N	N	N	NA	N	N	N	nad	nad	0	0	0	0	0	0	0	0	BITTEN / CRUSHED SNAKE NOS	Snake	Y	Leg	1	N	0	Y - IHT Pompuraaw	Y	Y	N
1606		31 Aug 2019	8	2019	01 Sep 2019	42	F	130	7.1	4.91	230	BFR no fragmented red cells	24	2.4	0.3	1.0	306	66		N	N	N	N	N	NA	N	N	N	nad	nad	0	0	0	0	0	0	0	0	BITTEN / CRUSHED SNAKE NOS	Snake	Y	Leg	1	N	0	Y - IHT Pormpuraaw	Y	Y	N
1622		11 Sep 2017	9	2017	11 Sep 2017	16	M	138	8.7	6.29	265	no comment	51	1.6	0.4	1.1	255	64		N	N	N	N	N	NA	N	N	N	nad	nad	0	0	0	0	0	0	0	0	BITTEN / CRUSHED SNAKE NOS	Snake	Y	Leg	1	N	0	Y - IHT Weipa	Y	Y	N
1623		15 Oct 2018	10	2018	16 Oct 2018	20	M	148	8.7	4.39	173	no comment	27	1.9	0.1	1.0	100	82		N	N	N	N	N	NA	N	N	N	nad	nad	0	0	0	0	0	0	0	0	BITTEN / CRUSHED SNAKE NOS	Snake	Y	Leg	1	N	0	Y - IHT Weipa	Y	Y	N
1627		20 Nov 2017	11	2017	20 Nov 2017	4	M	124	6.8	3.48	270	no comment	38	2.0	0.6	1.1	92	33		N	N	N	N	N	NA	N	N	N	nad	nad	0	0	0	0	0	0	0	0	BITTEN / CRUSHED SNAKE NOS	Snake	Y	Leg	1	N	0	Y - IHT Wujal Wujal	Y	Y	N
1634		30 Jul 2017	7	2017	30 Jul 2017	30	M	151	12.6	9.48	305	no comment	25	2.0	0.4	1.1	248	92		N	N	N	N	N	NA	N	N	N	nad	nad	0	0	0	0	0	0	0	0	BITTEN / CRUSHED SNAKE NOS	Snake	Y	Leg	1	N	0	Y - IHT Yarrabah	Y	Y	N
1644		07 Aug 2018	8	2018	08 Aug 2018	18	M	152	10.1	7.82	227	no comment	26	2.1	1.0	1.1	294	82		N	N	N	N	N	NA	N	N	N	nad	nad	0	0	0	0	0	0	0	0	BITTEN / CRUSHED SNAKE NOS	Snake	Y	Leg	1	N	0	Y - Lifeflight retrieval	Y	Y	N
1653		17 Feb 2020	2	2020	18 Feb 2020	28	M	149	6.9	4.13	202	no comment	29	2.2	0.2	1.0	128	81		N	N	N	N	N	NA	N	Headache	N	nad	nad	0	0	0	0	0	0	0	0	BITTEN / CRUSHED SNAKE NOS	Snake	Y	Leg	1	N	0	Y - RFDS	Y	Y	N
1662		21 Aug 2018	8	2018	22 Aug 2018	53	F	122	5.7	3.04	227	no comment	23	2.3	0.5	1.0	144	77		N	N	N	N	N	NA	N	N	N	nad	nad	0	0	0	0	0	0	0	0	BITTEN / CRUSHED SNAKE NOS	Snake	Y	Leg	1	N	0	Y - RFDS	Y	Y	N
1663		22 Dec 2017	12	2017	22 Dec 2017	5	F	117	9.6	4.38	357	BFR no fragmented red cells	38	3.0		1.1	173	37		N	N	N	N	N	NA	N	Nausea	N	nad	nad	0	0	0	0	0	0	0	0	BITTEN / CRUSHED SNAKE NOS	Snake	Y	Leg	1	N	0	Y - RFDS; IHT Cooktown	Y	Y	N
1677	Taipan	06 Sep 2017	9	2017	08 Sep 2017	67	M	134	16.4	14.92	61	no comment	200	0.3	256.0	11.0	1840	71		N	N	N	N	Y	Taipan	N	Nausea, vomiting, haematuria, headache, diaphoresis, back pain, facial droop and diplopia	Y - taipan	N	EV with coagulopathy	1	0	0	0	0	0	0	0	CONTACT WITH TAIPAN	Snake	Y	Leg	1	N	0	Y - IHT Weipa	Y	Y	N
1681	Taipan	02 Oct 2015	10	2015	05 Oct 2015	62	F	132	14.6	13.36	244	BFR no fragmented red cells	29	2.7	33.7	1.2	243	61		N	Y	N	N	N	not done	N	ptosis, lateral nystagmus, dipolopia, slurred speech	Y (1 vial polyvalent AV)	Y (anadphylaxis)	neurotoxicity, elevated d-dimer	1	0	0	0	0	0	1	0	CONTACT WITH TAIPAN	Snake	Y	Leg	1	N	0	Y - IHT Mareeba	Y	Y	N
1687	Taipan	17 Oct 2014	10	2014	22 Oct 2014	39	M	125	11.9	9.9	147	no comment	200	1.1	37.0	11.0	2220	121	17	N	Y	N	N	Y	Taipan (PNG)	N	dizzy, haemoptysis, ptosis, dysphagia, febrile, resp arrest, dysphagia	Y (2 vials polyvalent AV)	Y (?related to resp arrest)	coagulopathy, VDK+, neurotoxicity	1	0	0	0	0	0	1	0	CONTACT WITH TAIPAN	Snake	Y	Leg	1	N	0	Y - IHT TI	Y	Y	N
1691	Taipan	04 May 2020	5	2020	21 May 2020	46	M	132	18.0	15.56	58	no comment	92	0.8	256.0	1.8	294	429		N	N	N	N	Y	negative	N	Nausea / vomiting, abdominal pain, headache, occular muscle paralysis, swallowing changes	Y - polyvalent	N	Partial VICC + MAHA	1	0	1	0	0	0	0	0	SNAKE VENOM	Snake	Y	Leg	1	N	1	Y - IHT Innisfail	Y	Y	N
1692	Taipan	05 Oct 2014	10	2014	23 Oct 2014	58	M	107	13.1	11.41	36	BFR no fragmented red cells	200	0.3	37.0	3.5	560	423		Y - 1 unit	Y	N	N	Y	Brown snake (brown, dugite, gwardar)	N	bite, local bleeding, haemoptysis, ptosis, altered speech	Y (1 vial brown snake AV)	N	coagulopathy, CK, renal failure	1	1	0	1	0	0	0	0	CONTACT WITH BROWN SNAKE	Snake	Y	Leg	1	N	0	Y - IHT Atherton	Y	Y	N
1693	Taipan	13 Jul 2018	7	2018	22 Aug 2018	69	M	145	17.4	15.71	74	BFR no fragmented red cells	60	0.8	256.0	1.7	3480	284		N	N	N	N	Y	Urine - taipan	Y	Nausea, myalgia, peri-oral tingling, collapse in ED	Y - taipan	Y - anadphylaxis requiring adrenadline infusion	Neurotoxicity, myotoxicity, VICC, likely MAHA	1	1	1	0	0	0	1	0	CONTACT WITH TAIPAN	Snake	Y	Leg	1	N	1	Y - IHT Cooktown	Y	Y	N
1349		28 Aug 2019	8	2019	29 Aug 2019	55	F	137	6.3	3.8	213	BFR no fragmented red cells	30	2.3	0.1	0.9	100	63		N	N	N	N	N	NA	N	N	N	nad	nad	0	0	0	0	0	0	0	0	BITTEN / CRUSHED SNAKE NOS	Snake	Y	Multiple	0	N	0	N	N	N	N
1350		08 Dec 2018	12	2018	09 Dec 2018	1	M	104	15.2	5.81	578	BFR no fragmented red cells	33	2.5	0.2	1.1	81	29		N	N	N	N	N	NA	N	N	N	nad	nad	0	0	0	0	0	0	0	0	BITTEN / CRUSHED SNAKE NOS	Snake	Y	Multiple	0	N	0	N	N	N	N
1391		16 Nov 2015	11	2015	16 Nov 2015	43	F	113	9.2	5.62	271	no comment	28	2.4	0.4	1.1	115	59		N	N	N	N	N	not done	N	pain at bite	N	nad	nad	0	0	0	0	0	0	0	0	BITTEN / CRUSHED SNAKE NOS	Snake	Y	Multiple	0	N	0	Y - IHT Babinda	Y	Y	N
1414		20 Oct 2018	10	2018	20 Oct 2018	30	F	130	7.6	4.51	247	no comment	27	2.2	0.1	1.0	176	71		N	N	N	N	N	NA	N	N	N	nad	nad	0	0	0	0	0	0	0	0	BITTEN / CRUSHED SNAKE NOS	Snake	Y	Multiple	0	N	0	Y - IHT Cooktown	Y	Y	N
1515		17 Feb 2017	2	2017	18 Feb 2017	42	F	134	10.7	7.04	408	no comment	27	2.6	0.5	1.1	312	84		N	N	N	N	N	NA	N	Pain, nausea, diplopia	N	nad	nad	0	0	0	0	0	0	0	0	BITTEN / CRUSHED SNAKE NOS	Snake	Y	Multiple	0	N	0	Y - IHT Mareeba	Y	Y	N
1516		22 Mar 2016	3	2016	23 Mar 2016	10	M	125	7.0	3.7	272	no comment	33	3.5		1.2	402	46		N	N	N	N	N	not done	N	N	N	nad	nad	0	0	0	0	0	0	0	0	BITTEN OR CRUSHED BY NONVENOMOUS SNAKE	Snake	Y	Multiple	0	N	0	Y - IHT Mareeba	Y	Y	N
1694		17 Mar 2015	3	2015	05 May 2015	57	M	143	10.4	7.79	315	no comment	28	3.0	1.0	1.2	678	166		N	N	N	N	N	not done	N	pain in hand, thigh, toe	N	nad	nad	0	0	0	0	0	0	0	0	BITTEN / CRUSHED SNAKE NOS	Snake	Y	Multiple	0	Y	0	N	N	N	N
1351		19 Dec 2016	12	2016	19 Dec 2016	72	M	142	6.3	2.69	169	no comment	30	2.6		1.0	110	86		N	N	N	N	N	not done	N	N	N	nad	nad	0	0	0	0	0	0	0	0	BITTEN OR CRUSHED BY NONVENOMOUS SNAKE	Snake	Y	Trunk	0	N	0	N	N	N	N
1599		05 Aug 2014	8	2014	05 Aug 2014	40	M	152	6.2	3.01	192	BFR no fragmented red cells	34	1.7	0.3	1.0	259	88	2.299999952	N	N	N	N	N	not done	N	minor pain, whoozy	N	nad	nad	0	0	0	0	0	0	0	0	CONTACT WITH BROWN SNAKE	Snake	Y	Trunk	0	N	0	Y - IHT Mossman	Y	Y	N
1635		09 Oct 2015	10	2015	09 Oct 2015	6	F	104	13.6	5.02	463	no comment	32	2.9		1.1	146	39		N	N	N	N	N	not done	N	N	N	nad	nad	0	0	0	0	0	0	0	0	BITTEN / CRUSHED SNAKE NOS	Snake	Y	Trunk	0	N	0	Y - IHT Yarrabah	Y	Y	N
1683	Taipan	19 Aug 2017	8	2017	22 Aug 2017	67	M	116	13.6	12	138	BFR no fragmented red cells	200	0.3	256.0	11.0	1530	130		N	N	N	N	N	NA	N	Diplopia, headache, nausea, bleeding fums, diaphoresis	Y - polyvalent	N	Coagulopathy, neurotoxicity	1	0	0	0	0	0	1	0	CONTACT WITH TAIPAN	Snake	Y	Trunk	0	N	0	N	N	N	N
1690	Taipan	11 Aug 2015	8	2015	19 Aug 2015	31	F	105	14.9	12.07	154	no comment	38	0.5	37.0	1.5	463	97		N	N	N	N	Y	Death Adder (Saibai)	Y - resp/weakness then GCS drop	drowsy, GCS 10, agitated, clutching at throat, incomprehansible speech, eyes open to voice, responding to commands, unable to swallow saliva, increased WOB, bleeding from venepuncture sites	Y (1 vial polyvalent AV)	N	neurotoxicity and coagulopathy	1	0	0	0	0	0	1	0	CONTACT WITH DEATH ADDER	Snake	Y	Trunk	0	N	1	Y - RFDS	Y	Y	N
[truncated: 72 more columns]
